# Supplementary material for: Full-Length Transcriptome and RNA-Seq Analyses Reveal the Mechanisms Underlying Waterlogging Tolerance in Kiwifruit (Actinidia valvata)
Source: Int J Mol Sci. 2022 Mar 17;23(6):3237. doi: 10.3390/ijms23063237 (PMC8951935; doi:10.3390/ijms23063237)
Supplement: Supplementary file 1 [file ijms-23-03237-s001.zip]

Archive with 12 entries (12 files):
- Additional file 1.tif
- Additional file 10.xls
- Additional file 11.xlsx
- Additional file 2.tif
- Additional file 3.tif
- Additional file 4.tif
- Additional file 5.tif
- Additional file 6.tif
- Additional file 7.xlsx
- Additional file 8.xls
- Additional file 9.xlsx
- Supplemental figure legends and table captions.pdf
