# Supplementary material for: Full-Length Transcriptome and RNA-Seq Analyses Reveal the Mechanisms Underlying Waterlogging Tolerance in Kiwifruit (Actinidia valvata)
Source: Int J Mol Sci. 2022 Mar 17;23(6):3237. doi: 10.3390/ijms23063237 (PMC8951935; doi:10.3390/ijms23063237)
Supplement: Supplementary file 1 [file ijms-23-03237-s001.zip › Additional file 7.xlsx]

## Sheet: Table S1
Table S1 Summary of the transcriptome data for KR5 (A. valvata) using PacBio Iso-Seq.
	Base (G)	Number	Mean_length	Min_length	Max_length	N50	N90
Polymerase Reads	25.41	584697	43453	——	——	70917	——
Subreads	24.59	11028129	2231	——	——	2788	——
CCS	——	495692	2831	50	14828	3204	——
FLNC	——	432640	2657	200	14260	3018	——
NFL	——	57814	——	——	——	——	——
Polished consensus	——	243663	2751	196	14260	3246	1776
LoRDEC correct	——	243663	2749	195	14283	3244	1774
CD-HIT correct	——	130236	3025	195	14283	3803	1926

## Sheet: Table S2
Table S2 Summary of reads sequenced from KR5 roots using Illumina RNA-Seq.
Sample	Raw Reads	Raw Bases (G)	Clean Reads	Clean Bases (G)	Error Rate (%)	Q20 (%)	Q30 (%)	GC Content (%)
W 0h_1_1	25275126	3.79	24445822	3.67	0.01	98.13	94.8	45.77
W 0h_1_2	25275126	3.79	24445822	3.67	0.03	91.89	82.5	46.07
W 0h_2_1	22848687	3.42	22411398	3.36	0.01	98.55	95.74	47.1
W 0h_2_2	22848687	3.42	22411398	3.36	0.02	94.61	88.13	47.26
W 0h_3_1	23426469	3.51	23002320	3.45	0.01	98.56	95.78	45.98
W 0h_3_2	23426469	3.51	23002320	3.45	0.02	95.19	89.26	46.09
W 12h_1_1	27149879	4.07	26687165	4	0.01	98.56	95.74	47.47
W 12h_1_2	27149879	4.07	26687165	4	0.02	95.23	89.24	47.6
W 12h_2_1	26949285	4.04	26431374	3.96	0.01	98.54	95.71	47.35
W 12h_2_2	26949285	4.04	26431374	3.96	0.02	94.72	88.31	47.52
W 12h_3_1	22396439	3.35	22037459	3.31	0.01	98.56	95.75	47.06
W 12h_3_2	22396439	3.35	22037459	3.31	0.02	95.58	90	47.14
W 24h_1_1	26652407	3.99	26201834	3.93	0.01	98.53	95.71	46.85
W 24h_1_2	26652407	3.99	26201834	3.93	0.02	95.48	89.82	46.93
W 24h_2_1	23672806	3.55	23243883	3.49	0.01	98.56	95.77	46.61
W 24h_2_2	23672806	3.55	23243883	3.49	0.02	95.27	89.42	46.72
W 24h_3_1	20517109	3.07	20017546	3	0.01	98.09	94.7	45.38
W 24h_3_2	20517109	3.07	20017546	3	0.03	93.05	84.67	45.58
W 72h_1_1	24439951	3.66	24027420	3.6	0.01	98.54	95.75	45.03
W 72h_1_2	24439951	3.66	24027420	3.6	0.02	95.8	90.48	45.09
W 72h_2_1	26004050	3.9	25339869	3.8	0.01	98.1	94.69	46.06
W 72h_2_2	26004050	3.9	25339869	3.8	0.03	92.55	83.65	46.33
W 72h_3_1	23734809	3.56	23175607	3.48	0.01	98.16	94.85	45.4
W 72h_3_2	23734809	3.56	23175607	3.48	0.02	93.26	85.06	45.59
W, waterlogging.
