# Supplementary material for: Full-Length Transcriptome and RNA-Seq Analyses Reveal the Mechanisms Underlying Waterlogging Tolerance in Kiwifruit (Actinidia valvata)
Source: Int J Mol Sci. 2022 Mar 17;23(6):3237. doi: 10.3390/ijms23063237 (PMC8951935; doi:10.3390/ijms23063237)
Supplement: Supplementary file 1 [file ijms-23-03237-s001.zip › Additional file 8.xls]

## Sheet: Table S3
Table S3 Changes in free amino acid contents in KR5 roots under waterlogging stress.
Family		Hours after waterlogging
	Free amino acid content (μg g-1 FW)	0	12	24	72
Glutamate family	Glutamate	80.48±1.56c	98.03±0.24a	91.04±1.61b	98.65±2.01a
	Arginine	45.24±0.30c	206.79±0.51a	142.46±5.00b	145.32±1.33b
	Proline	2.99±1.05b	4.72±0.01a	2.71±0.28b	3.37±0.10ab
	Histidine	5.01±0.94a	5.02±0.01a	6.53±2.92a	6.30±3.36a
Aspartate family	Aspartate	35.07±0.11a	7.87±0.02d	9.88±0.16c	11.23±0.32b
	Lysine	0.85±0.07c	2.04±0.01a	1.40±0.15b	1.94±0.05a
	Isoleucine	0.77±0.02b	1.45±0.00a	1.55±0.28a	1.70±0.01a
	Threonine	3.54±0.16c	5.41±0.01b	6.26±0.06a	5.99±0.52ab
Serine family	Serine	6.99±0.25d	14.12±0.04a	13.06±0.34c	13.56±0.05b
	Glycine	0.85±0.03b	1.18±0.00b	1.67±0.08b	3.58±0.77a
	Cysteine	13.08±0.08b	16.32±0.04a	11.48±0.30c	10.86±0.23d
Pyruvate family	Alanine	6.44±0.15d	76.66±0.19c	93.83±0.28b	139.54±3.95a
	Valine	3.55±0.13c	5.31±0.01a	4.52±0.33b	4.77±0.01b
	Leucine	8.45±0.41b	7.80±0.02b	8.11±2.72b	18.90±0.09a
Aromatic amino acid family	Tyrosine	6.66±0.63ab	8.20±0.02a	5.20±0.91bc	4.56±0.20c
	Phenylalanine	1.00±0.07b	1.22±0.00ab	1.04±0.16b	1.34±0.01a
Note: Data are expressed as averages ± SD. n = 3. Significant differences between treatments per amino acid at P < 0.05 are indicated by different letters (Duncan’s test).
