# Supplementary material for: Full-Length Transcriptome and RNA-Seq Analyses Reveal the Mechanisms Underlying Waterlogging Tolerance in Kiwifruit (Actinidia valvata)
Source: Int J Mol Sci. 2022 Mar 17;23(6):3237. doi: 10.3390/ijms23063237 (PMC8951935; doi:10.3390/ijms23063237)
Supplement: Supplementary file 1 [file ijms-23-03237-s001.zip › Additional file 9.xlsx]

## Sheet: Table S4
Table S4 Unigenes predicted to encode transcription factors (TFs).
TF_ID	TF Family	Type
i4_LQ_K_c57014/f1p20/4260	Alfin-like	TF
i5_LQ_K_c4341/f1p0/5310	Alfin-like	TF
i1_HQ_K_c28951/f2p0/1275	Alfin-like	TF
i1_HQ_K_c29399/f5p9/1110	Alfin-like	TF
i1_HQ_K_c88057/f3p0/1140	Alfin-like	TF
i1_HQ_K_c88527/f4p3/1078	Alfin-like	TF
i0_LQ_K_c18919/f1p2/884	Alfin-like	TF
i0_LQ_K_c6192/f1p0/443	Alfin-like	TF
i3_HQ_K_c18601/f2p0/3585	Alfin-like	TF
i1_LQ_K_c14134/f1p1/1217	Alfin-like	TF
i1_LQ_K_c16041/f1p0/1117	Alfin-like	TF
i1_LQ_K_c21674/f1p2/1160	Alfin-like	TF
i1_LQ_K_c43164/f1p2/1252	Alfin-like	TF
i1_LQ_K_c54867/f1p0/1343	Alfin-like	TF
i1_LQ_K_c66774/f1p1/1038	Alfin-like	TF
i1_LQ_K_c75650/f1p2/1690	Alfin-like	TF
i1_LQ_K_c79107/f1p3/1213	Alfin-like	TF
i1_LQ_K_c89847/f1p0/1083	Alfin-like	TF
i2_LQ_K_c7631/f1p3/2757	Alfin-like	TF
i2_LQ_K_c155672/f1p1/2775	Alfin-like	TF
i2_LQ_K_c44249/f1p4/2640	Alfin-like	TF
i2_LQ_K_c110712/f1p12/2795	Alfin-like	TF
i2_LQ_K_c78423/f1p2/2847	Alfin-like	TF
i3_LQ_K_c15412/f1p0/3308	Alfin-like	TF
i4_LQ_K_c19540/f1p18/4165	Alfin-like	TF
i4_LQ_K_c40812/f1p4/4277	Alfin-like	TF
i4_LQ_K_c47264/f1p0/4952	Alfin-like	TF
i4_LQ_K_c59023/f1p20/4781	Alfin-like	TF
i2_HQ_K_c39414/f3p0/2450	AP2/ERF-AP2	TF
i2_HQ_K_c84116/f2p0/2515	AP2/ERF-AP2	TF
i2_HQ_K_c9524/f3p0/2338	AP2/ERF-AP2	TF
i1_LQ_K_c11060/f1p2/1888	AP2/ERF-AP2	TF
i1_LQ_K_c22015/f1p1/1656	AP2/ERF-AP2	TF
i1_LQ_K_c24640/f1p3/1514	AP2/ERF-AP2	TF
i1_LQ_K_c26314/f1p14/1814	AP2/ERF-AP2	TF
i1_LQ_K_c42994/f1p16/1679	AP2/ERF-AP2	TF
i1_LQ_K_c55867/f1p1/1783	AP2/ERF-AP2	TF
i1_LQ_K_c59789/f1p1/1915	AP2/ERF-AP2	TF
i1_LQ_K_c60217/f1p5/1876	AP2/ERF-AP2	TF
i1_LQ_K_c76746/f1p0/1676	AP2/ERF-AP2	TF
i2_LQ_K_c134154/f1p0/2374	AP2/ERF-AP2	TF
i2_LQ_K_c135353/f1p0/2500	AP2/ERF-AP2	TF
i2_LQ_K_c4461/f1p0/2740	AP2/ERF-AP2	TF
i2_LQ_K_c158720/f1p0/2544	AP2/ERF-AP2	TF
i2_LQ_K_c158946/f1p3/2258	AP2/ERF-AP2	TF
i2_LQ_K_c24955/f1p0/2254	AP2/ERF-AP2	TF
i2_LQ_K_c27832/f1p0/2435	AP2/ERF-AP2	TF
i2_LQ_K_c29272/f1p0/2485	AP2/ERF-AP2	TF
i2_LQ_K_c30072/f1p0/2432	AP2/ERF-AP2	TF
i2_LQ_K_c44094/f1p1/2241	AP2/ERF-AP2	TF
i2_LQ_K_c56603/f1p0/2490	AP2/ERF-AP2	TF
i2_LQ_K_c57140/f1p0/2085	AP2/ERF-AP2	TF
i2_LQ_K_c62328/f1p0/2411	AP2/ERF-AP2	TF
i2_LQ_K_c104478/f1p0/2614	AP2/ERF-AP2	TF
i2_LQ_K_c105288/f1p0/2411	AP2/ERF-AP2	TF
i2_LQ_K_c105508/f1p0/2736	AP2/ERF-AP2	TF
i2_LQ_K_c110102/f1p0/2348	AP2/ERF-AP2	TF
i2_LQ_K_c38005/f1p0/2370	AP2/ERF-AP2	TF
i2_LQ_K_c67811/f1p0/2297	AP2/ERF-AP2	TF
i2_LQ_K_c83170/f1p0/2372	AP2/ERF-AP2	TF
i3_LQ_K_c31653/f1p0/3016	AP2/ERF-AP2	TF
i4_LQ_K_c48611/f1p0/4406	AP2/ERF-ERF	TF
i5_LQ_K_c11368/f1p4/5023	AP2/ERF-ERF	TF
i0_HQ_K_c1007/f4p0/922	AP2/ERF-ERF	TF
i0_HQ_K_c1135/f4p0/879	AP2/ERF-ERF	TF
i0_HQ_K_c13081/f2p2/792	AP2/ERF-ERF	TF
i0_HQ_K_c1360/f4p0/924	AP2/ERF-ERF	TF
i0_HQ_K_c13872/f2p3/881	AP2/ERF-ERF	TF
i0_HQ_K_c16955/f5p0/840	AP2/ERF-ERF	TF
i0_HQ_K_c1831/f2p0/837	AP2/ERF-ERF	TF
i0_HQ_K_c18370/f2p0/935	AP2/ERF-ERF	TF
i0_HQ_K_c18456/f2p0/764	AP2/ERF-ERF	TF
i0_HQ_K_c2341/f2p9/745	AP2/ERF-ERF	TF
i0_HQ_K_c28329/f2p0/953	AP2/ERF-ERF	TF
i0_HQ_K_c5352/f2p0/969	AP2/ERF-ERF	TF
i0_HQ_K_c864/f7p5/792	AP2/ERF-ERF	TF
i0_HQ_K_c9277/f2p25/733	AP2/ERF-ERF	TF
i1_HQ_K_c11397/f2p2/1727	AP2/ERF-ERF	TF
i1_HQ_K_c12164/f2p0/1837	AP2/ERF-ERF	TF
i1_HQ_K_c1273/f6p0/1941	AP2/ERF-ERF	TF
i1_HQ_K_c21874/f3p0/1522	AP2/ERF-ERF	TF
i1_HQ_K_c21982/f3p1/1196	AP2/ERF-ERF	TF
i1_HQ_K_c22086/f2p0/1265	AP2/ERF-ERF	TF
i1_HQ_K_c23008/f2p5/1511	AP2/ERF-ERF	TF
i1_HQ_K_c23619/f5p1/1624	AP2/ERF-ERF	TF
i1_HQ_K_c29567/f3p1/1057	AP2/ERF-ERF	TF
i1_HQ_K_c29588/f3p0/1242	AP2/ERF-ERF	TF
i1_HQ_K_c3500/f2p8/1290	AP2/ERF-ERF	TF
i1_HQ_K_c36309/f2p0/1472	AP2/ERF-ERF	TF
i1_HQ_K_c41173/f3p2/1588	AP2/ERF-ERF	TF
i1_HQ_K_c45645/f2p1/1027	AP2/ERF-ERF	TF
i1_HQ_K_c48840/f27p1/1557	AP2/ERF-ERF	TF
i1_HQ_K_c51201/f2p0/1247	AP2/ERF-ERF	TF
i1_HQ_K_c59833/f2p3/1739	AP2/ERF-ERF	TF
i1_HQ_K_c68003/f14p0/1110	AP2/ERF-ERF	TF
i1_HQ_K_c68060/f10p0/1148	AP2/ERF-ERF	TF
i1_HQ_K_c81301/f3p2/1048	AP2/ERF-ERF	TF
i1_HQ_K_c81521/f3p2/1118	AP2/ERF-ERF	TF
i1_HQ_K_c81739/f2p0/1048	AP2/ERF-ERF	TF
i1_HQ_K_c81809/f2p0/1095	AP2/ERF-ERF	TF
i1_HQ_K_c87531/f6p0/1200	AP2/ERF-ERF	TF
i1_HQ_K_c8819/f7p0/1150	AP2/ERF-ERF	TF
i1_HQ_K_c88539/f5p0/1094	AP2/ERF-ERF	TF
i1_HQ_K_c88560/f4p0/1107	AP2/ERF-ERF	TF
i1_HQ_K_c88762/f85p2/1925	AP2/ERF-ERF	TF
i1_HQ_K_c88780/f61p1/1967	AP2/ERF-ERF	TF
i1_HQ_K_c9441/f3p1/1514	AP2/ERF-ERF	TF
i1_HQ_K_c9739/f5p2/1404	AP2/ERF-ERF	TF
i2_HQ_K_c10991/f2p3/2306	AP2/ERF-ERF	TF
i2_HQ_K_c146924/f4p1/2109	AP2/ERF-ERF	TF
i2_HQ_K_c171734/f4p7/2108	AP2/ERF-ERF	TF
i2_HQ_K_c25027/f2p8/2540	AP2/ERF-ERF	TF
i2_HQ_K_c55665/f3p6/2705	AP2/ERF-ERF	TF
i0_LQ_K_c11389/f1p0/957	AP2/ERF-ERF	TF
i0_LQ_K_c11516/f1p1/867	AP2/ERF-ERF	TF
i0_LQ_K_c12142/f3p0/993	AP2/ERF-ERF	TF
i0_LQ_K_c12540/f1p37/934	AP2/ERF-ERF	TF
i0_LQ_K_c13170/f1p1/971	AP2/ERF-ERF	TF
i0_LQ_K_c13433/f2p0/935	AP2/ERF-ERF	TF
i0_LQ_K_c18834/f1p0/666	AP2/ERF-ERF	TF
i0_LQ_K_c19603/f1p3/758	AP2/ERF-ERF	TF
i0_LQ_K_c21850/f1p0/928	AP2/ERF-ERF	TF
i0_LQ_K_c23244/f1p0/788	AP2/ERF-ERF	TF
i0_LQ_K_c23331/f1p11/676	AP2/ERF-ERF	TF
i0_LQ_K_c23779/f1p0/966	AP2/ERF-ERF	TF
i0_LQ_K_c23983/f1p0/975	AP2/ERF-ERF	TF
i0_LQ_K_c25120/f1p3/997	AP2/ERF-ERF	TF
i0_LQ_K_c25499/f1p5/930	AP2/ERF-ERF	TF
i0_LQ_K_c25525/f1p3/584	AP2/ERF-ERF	TF
i0_LQ_K_c25932/f1p8/687	AP2/ERF-ERF	TF
i0_LQ_K_c26626/f1p0/620	AP2/ERF-ERF	TF
i0_LQ_K_c27481/f1p12/759	AP2/ERF-ERF	TF
i0_LQ_K_c28094/f1p0/483	AP2/ERF-ERF	TF
i0_LQ_K_c28648/f1p0/1003	AP2/ERF-ERF	TF
i0_LQ_K_c28689/f1p0/962	AP2/ERF-ERF	TF
i0_LQ_K_c28842/f1p0/841	AP2/ERF-ERF	TF
i0_LQ_K_c3715/f1p18/941	AP2/ERF-ERF	TF
i0_LQ_K_c4107/f1p0/580	AP2/ERF-ERF	TF
i0_LQ_K_c7087/f1p0/866	AP2/ERF-ERF	TF
i0_LQ_K_c8357/f1p0/926	AP2/ERF-ERF	TF
i0_LQ_K_c8519/f1p3/947	AP2/ERF-ERF	TF
i2_HQ_K_c124615/f2p0/2708	AP2/ERF-ERF	TF
i2_HQ_K_c124732/f2p0/2389	AP2/ERF-ERF	TF
i1_LQ_K_c10518/f1p2/1527	AP2/ERF-ERF	TF
i1_LQ_K_c11006/f1p0/1694	AP2/ERF-ERF	TF
i1_LQ_K_c11437/f1p5/1426	AP2/ERF-ERF	TF
i1_LQ_K_c11548/f1p2/1867	AP2/ERF-ERF	TF
i1_LQ_K_c11789/f1p0/1250	AP2/ERF-ERF	TF
i1_LQ_K_c12450/f1p0/1743	AP2/ERF-ERF	TF
i1_LQ_K_c13507/f1p0/1668	AP2/ERF-ERF	TF
i1_LQ_K_c14301/f1p0/1708	AP2/ERF-ERF	TF
i1_LQ_K_c15322/f1p6/1147	AP2/ERF-ERF	TF
i1_LQ_K_c16233/f1p1/1066	AP2/ERF-ERF	TF
i1_LQ_K_c19140/f1p0/1897	AP2/ERF-ERF	TF
i1_LQ_K_c19734/f2p0/1488	AP2/ERF-ERF	TF
i1_LQ_K_c20015/f1p2/1764	AP2/ERF-ERF	TF
i1_LQ_K_c20073/f1p0/1423	AP2/ERF-ERF	TF
i1_LQ_K_c20697/f1p5/1201	AP2/ERF-ERF	TF
i1_LQ_K_c21720/f1p1/1668	AP2/ERF-ERF	TF
i1_LQ_K_c22205/f1p0/1556	AP2/ERF-ERF	TF
i1_LQ_K_c23201/f1p7/1307	AP2/ERF-ERF	TF
i1_LQ_K_c23312/f1p11/1122	AP2/ERF-ERF	TF
i1_LQ_K_c25808/f1p0/1678	AP2/ERF-ERF	TF
i1_LQ_K_c26822/f1p0/1487	AP2/ERF-ERF	TF
i1_LQ_K_c27015/f1p3/1187	AP2/ERF-ERF	TF
i1_LQ_K_c27240/f1p0/1147	AP2/ERF-ERF	TF
i1_LQ_K_c27673/f1p0/1868	AP2/ERF-ERF	TF
i1_LQ_K_c27764/f1p1/1803	AP2/ERF-ERF	TF
i1_LQ_K_c28020/f1p4/1147	AP2/ERF-ERF	TF
i1_LQ_K_c2941/f1p0/1296	AP2/ERF-ERF	TF
i1_LQ_K_c30045/f1p1/1019	AP2/ERF-ERF	TF
i1_LQ_K_c30860/f1p0/1041	AP2/ERF-ERF	TF
i1_LQ_K_c30914/f1p0/1059	AP2/ERF-ERF	TF
i1_LQ_K_c3205/f1p0/1464	AP2/ERF-ERF	TF
i1_LQ_K_c34349/f1p0/1323	AP2/ERF-ERF	TF
i1_LQ_K_c34518/f1p0/1516	AP2/ERF-ERF	TF
i1_LQ_K_c34664/f1p1/1982	AP2/ERF-ERF	TF
i1_LQ_K_c34987/f1p2/1449	AP2/ERF-ERF	TF
i1_LQ_K_c3511/f1p5/1981	AP2/ERF-ERF	TF
i1_LQ_K_c36142/f1p3/1678	AP2/ERF-ERF	TF
i1_LQ_K_c37377/f1p0/1697	AP2/ERF-ERF	TF
i1_LQ_K_c37683/f1p0/1861	AP2/ERF-ERF	TF
i1_LQ_K_c39115/f1p0/1711	AP2/ERF-ERF	TF
i1_LQ_K_c39223/f1p2/1399	AP2/ERF-ERF	TF
i1_LQ_K_c39272/f1p0/1123	AP2/ERF-ERF	TF
i1_LQ_K_c40032/f1p0/1665	AP2/ERF-ERF	TF
i1_LQ_K_c40565/f2p0/1169	AP2/ERF-ERF	TF
i1_LQ_K_c4070/f1p2/1970	AP2/ERF-ERF	TF
i1_LQ_K_c40919/f1p2/1918	AP2/ERF-ERF	TF
i1_LQ_K_c41490/f1p0/1263	AP2/ERF-ERF	TF
i1_LQ_K_c42720/f1p0/1801	AP2/ERF-ERF	TF
i1_LQ_K_c44174/f1p3/1945	AP2/ERF-ERF	TF
i1_LQ_K_c44287/f1p1/1166	AP2/ERF-ERF	TF
i1_LQ_K_c4740/f1p2/1990	AP2/ERF-ERF	TF
i1_LQ_K_c47669/f1p0/1016	AP2/ERF-ERF	TF
i1_LQ_K_c47980/f1p0/1105	AP2/ERF-ERF	TF
i1_LQ_K_c48139/f1p0/1034	AP2/ERF-ERF	TF
i1_LQ_K_c5092/f1p1/1628	AP2/ERF-ERF	TF
i1_LQ_K_c51416/f1p0/1905	AP2/ERF-ERF	TF
i1_LQ_K_c52436/f1p0/1133	AP2/ERF-ERF	TF
i1_LQ_K_c52610/f1p0/1415	AP2/ERF-ERF	TF
i1_LQ_K_c53278/f1p0/1854	AP2/ERF-ERF	TF
i1_LQ_K_c54442/f1p0/1150	AP2/ERF-ERF	TF
i1_LQ_K_c55933/f1p0/1305	AP2/ERF-ERF	TF
i1_LQ_K_c55955/f1p0/1932	AP2/ERF-ERF	TF
i1_LQ_K_c5751/f1p4/1837	AP2/ERF-ERF	TF
i1_LQ_K_c7110/f1p1/1866	AP2/ERF-ERF	TF
i1_LQ_K_c7721/f1p1/1927	AP2/ERF-ERF	TF
i1_LQ_K_c7932/f1p0/1251	AP2/ERF-ERF	TF
i1_LQ_K_c8010/f1p1/1689	AP2/ERF-ERF	TF
i1_LQ_K_c53722/f1p1/1398	AP2/ERF-ERF	TF
i1_LQ_K_c53835/f1p0/1511	AP2/ERF-ERF	TF
i1_LQ_K_c56126/f1p0/1180	AP2/ERF-ERF	TF
i1_LQ_K_c58385/f1p1/1839	AP2/ERF-ERF	TF
i1_LQ_K_c59322/f1p0/1147	AP2/ERF-ERF	TF
i1_LQ_K_c60001/f1p1/1527	AP2/ERF-ERF	TF
i1_LQ_K_c60227/f1p3/1727	AP2/ERF-ERF	TF
i1_LQ_K_c60348/f1p0/1980	AP2/ERF-ERF	TF
i1_LQ_K_c64562/f1p3/1067	AP2/ERF-ERF	TF
i1_LQ_K_c64995/f1p1/1100	AP2/ERF-ERF	TF
i1_LQ_K_c65288/f1p112/1029	AP2/ERF-ERF	TF
i1_LQ_K_c67315/f2p1/1207	AP2/ERF-ERF	TF
i1_LQ_K_c70248/f1p0/1719	AP2/ERF-ERF	TF
i1_LQ_K_c71386/f1p0/1946	AP2/ERF-ERF	TF
i1_LQ_K_c71403/f1p1/1939	AP2/ERF-ERF	TF
i1_LQ_K_c71552/f1p1/1936	AP2/ERF-ERF	TF
i1_LQ_K_c72336/f1p0/1739	AP2/ERF-ERF	TF
i1_LQ_K_c74751/f1p2/1900	AP2/ERF-ERF	TF
i1_LQ_K_c77527/f1p2/1581	AP2/ERF-ERF	TF
i1_LQ_K_c78316/f1p0/1757	AP2/ERF-ERF	TF
i1_LQ_K_c78759/f1p3/1328	AP2/ERF-ERF	TF
i1_LQ_K_c79203/f1p0/1222	AP2/ERF-ERF	TF
i1_LQ_K_c79617/f1p0/1571	AP2/ERF-ERF	TF
i1_LQ_K_c80025/f1p0/1558	AP2/ERF-ERF	TF
i1_LQ_K_c81302/f3p0/1087	AP2/ERF-ERF	TF
i1_LQ_K_c83754/f1p0/1034	AP2/ERF-ERF	TF
i1_LQ_K_c85954/f1p1/1006	AP2/ERF-ERF	TF
i1_LQ_K_c86993/f12p1/1297	AP2/ERF-ERF	TF
i1_LQ_K_c89754/f1p2/1510	AP2/ERF-ERF	TF
i1_LQ_K_c92083/f1p1/1026	AP2/ERF-ERF	TF
i1_LQ_K_c95272/f1p0/1008	AP2/ERF-ERF	TF
i1_LQ_K_c96185/f1p0/1034	AP2/ERF-ERF	TF
i2_LQ_K_c131520/f1p9/2699	AP2/ERF-ERF	TF
i2_LQ_K_c13287/f1p7/2780	AP2/ERF-ERF	TF
i2_LQ_K_c132995/f1p4/2613	AP2/ERF-ERF	TF
i2_LQ_K_c14707/f1p0/2364	AP2/ERF-ERF	TF
i2_LQ_K_c20501/f1p1/2216	AP2/ERF-ERF	TF
i2_LQ_K_c23148/f1p0/2248	AP2/ERF-ERF	TF
i2_LQ_K_c4990/f1p7/2537	AP2/ERF-ERF	TF
i2_LQ_K_c9304/f1p0/2399	AP2/ERF-ERF	TF
i2_LQ_K_c155826/f1p1/2275	AP2/ERF-ERF	TF
i2_LQ_K_c183513/f1p7/2014	AP2/ERF-ERF	TF
i2_LQ_K_c25424/f1p0/2578	AP2/ERF-ERF	TF
i2_LQ_K_c26859/f1p0/2826	AP2/ERF-ERF	TF
i2_LQ_K_c27035/f1p7/2669	AP2/ERF-ERF	TF
i2_LQ_K_c27563/f1p7/2637	AP2/ERF-ERF	TF
i2_LQ_K_c31944/f1p1/2221	AP2/ERF-ERF	TF
i2_LQ_K_c32557/f1p1/2041	AP2/ERF-ERF	TF
i2_LQ_K_c34168/f1p7/2044	AP2/ERF-ERF	TF
i2_LQ_K_c36527/f1p0/2689	AP2/ERF-ERF	TF
i2_LQ_K_c42268/f1p0/2505	AP2/ERF-ERF	TF
i2_LQ_K_c43050/f1p0/2410	AP2/ERF-ERF	TF
i2_LQ_K_c46279/f1p0/2219	AP2/ERF-ERF	TF
i2_LQ_K_c60723/f1p0/2503	AP2/ERF-ERF	TF
i2_LQ_K_c61960/f1p0/2207	AP2/ERF-ERF	TF
i2_LQ_K_c63854/f1p0/2665	AP2/ERF-ERF	TF
i2_LQ_K_c64716/f1p1/2480	AP2/ERF-ERF	TF
i2_LQ_K_c67107/f1p8/2500	AP2/ERF-ERF	TF
i2_LQ_K_c67113/f1p0/2298	AP2/ERF-ERF	TF
i2_LQ_K_c70697/f1p1/2190	AP2/ERF-ERF	TF
i2_LQ_K_c72373/f1p0/2096	AP2/ERF-ERF	TF
i2_LQ_K_c101289/f1p9/2699	AP2/ERF-ERF	TF
i2_LQ_K_c102693/f1p0/2776	AP2/ERF-ERF	TF
i2_LQ_K_c103771/f1p0/2285	AP2/ERF-ERF	TF
i2_LQ_K_c113210/f1p0/2362	AP2/ERF-ERF	TF
i2_LQ_K_c119680/f1p5/2018	AP2/ERF-ERF	TF
i2_LQ_K_c129442/f1p0/2676	AP2/ERF-ERF	TF
i2_LQ_K_c130550/f1p0/2870	AP2/ERF-ERF	TF
i2_LQ_K_c151308/f1p0/2737	AP2/ERF-ERF	TF
i2_LQ_K_c152864/f1p0/2344	AP2/ERF-ERF	TF
i2_LQ_K_c160246/f1p0/2594	AP2/ERF-ERF	TF
i2_LQ_K_c16919/f1p6/1970	AP2/ERF-ERF	TF
i2_LQ_K_c79321/f1p4/2013	AP2/ERF-ERF	TF
i2_LQ_K_c95038/f1p0/2016	AP2/ERF-ERF	TF
i2_LQ_K_c95527/f1p0/2021	AP2/ERF-ERF	TF
i3_LQ_K_c10631/f1p1/3515	AP2/ERF-ERF	TF
i3_LQ_K_c12968/f1p0/3108	AP2/ERF-ERF	TF
i3_LQ_K_c15408/f1p1/3088	AP2/ERF-ERF	TF
i3_LQ_K_c19490/f1p6/3721	AP2/ERF-ERF	TF
i3_LQ_K_c20281/f1p2/3244	AP2/ERF-ERF	TF
i3_LQ_K_c23919/f1p0/3344	AP2/ERF-ERF	TF
i3_LQ_K_c24851/f1p2/3269	AP2/ERF-ERF	TF
i3_LQ_K_c27212/f1p0/3376	AP2/ERF-ERF	TF
i3_LQ_K_c30321/f1p0/3161	AP2/ERF-ERF	TF
i3_LQ_K_c35553/f1p0/3249	AP2/ERF-ERF	TF
i3_LQ_K_c37636/f1p2/3188	AP2/ERF-ERF	TF
i3_LQ_K_c38787/f1p2/3294	AP2/ERF-ERF	TF
i4_LQ_K_c12849/f1p1/4583	AP2/ERF-ERF	TF
i4_LQ_K_c15505/f1p2/4647	AP2/ERF-ERF	TF
i4_LQ_K_c20952/f1p2/4579	AP2/ERF-ERF	TF
i4_LQ_K_c24138/f1p4/4276	AP2/ERF-ERF	TF
i4_LQ_K_c8713/f1p0/4385	AP2/ERF-ERF	TF
i4_LQ_K_c33638/f1p0/4085	AP2/ERF-ERF	TF
i4_LQ_K_c34346/f1p0/4089	AP2/ERF-ERF	TF
i4_LQ_K_c34435/f1p0/4048	AP2/ERF-ERF	TF
i1_HQ_K_c18281/f3p0/1212	AP2/ERF-RAV	TF
i1_HQ_K_c22946/f2p3/1142	AP2/ERF-RAV	TF
i1_HQ_K_c6327/f2p0/1157	AP2/ERF-RAV	TF
i1_LQ_K_c13824/f1p0/1580	AP2/ERF-RAV	TF
i1_LQ_K_c40322/f1p0/1723	AP2/ERF-RAV	TF
i4_LQ_K_c57478/f1p0/4289	ARID	TR
i4_LQ_K_c57494/f1p1/4954	ARID	TR
i4_LQ_K_c61756/f1p1/4182	ARID	TR
i5_LQ_K_c3342/f1p6/5819	ARID	TR
i5_LQ_K_c6065/f1p0/5893	ARID	TR
i5_LQ_K_c6130/f1p1/5881	ARID	TR
i5_LQ_K_c7377/f1p0/5715	ARID	TR
i5_LQ_K_c7583/f1p1/5899	ARID	TR
i5_LQ_K_c8983/f1p2/5285	ARID	TR
i5_LQ_K_c9417/f1p0/5248	ARID	TR
i6_LQ_K_c1606/f1p0/6138	ARID	TR
i6_LQ_K_c1795/f1p2/6619	ARID	TR
i6_LQ_K_c1847/f1p0/6033	ARID	TR
i6_LQ_K_c666/f1p0/6373	ARID	TR
i6_LQ_K_c744/f1p0/6599	ARID	TR
i6_LQ_K_c767/f1p0/6539	ARID	TR
i6_LQ_K_c975/f1p0/6909	ARID	TR
i7_LQ_K_c454/f1p0/7394	ARID	TR
i2_HQ_K_c1074/f7p94/2885	ARID	TR
i2_HQ_K_c171592/f5p11/2061	ARID	TR
i2_HQ_K_c2796/f4p3/2633	ARID	TR
i2_HQ_K_c97327/f7p2/2429	ARID	TR
i2_HQ_K_c101397/f2p3/2489	ARID	TR
i3_HQ_K_c1632/f2p2/3882	ARID	TR
i4_HQ_K_c1651/f4p0/4328	ARID	TR
i4_HQ_K_c21496/f2p2/4200	ARID	TR
i4_HQ_K_c26822/f2p0/4432	ARID	TR
i4_HQ_K_c37281/f2p1/4250	ARID	TR
i4_HQ_K_c37313/f2p31/4349	ARID	TR
i4_HQ_K_c38227/f2p1/4421	ARID	TR
i4_HQ_K_c56232/f2p6/4678	ARID	TR
i5_HQ_K_c556/f3p2/5802	ARID	TR
i5_HQ_K_c930/f2p0/5153	ARID	TR
i6_HQ_K_c44/f2p0/6364	ARID	TR
i1_LQ_K_c23236/f1p6/1832	ARID	TR
i1_LQ_K_c24271/f1p0/1290	ARID	TR
i1_LQ_K_c42743/f1p5/1781	ARID	TR
i1_LQ_K_c53538/f1p5/1846	ARID	TR
i1_LQ_K_c86087/f1p7/1990	ARID	TR
i2_LQ_K_c134042/f1p11/2512	ARID	TR
i2_LQ_K_c151531/f1p1/2245	ARID	TR
i2_LQ_K_c156122/f1p0/2477	ARID	TR
i2_LQ_K_c6838/f1p1/3464	ARID	TR
i2_LQ_K_c142110/f1p11/2046	ARID	TR
i2_LQ_K_c151727/f1p2/2586	ARID	TR
i2_LQ_K_c175363/f1p1/3438	ARID	TR
i2_LQ_K_c185647/f1p13/2144	ARID	TR
i2_LQ_K_c19585/f1p2/2464	ARID	TR
i2_LQ_K_c37551/f1p1/2681	ARID	TR
i2_LQ_K_c42561/f1p3/2825	ARID	TR
i2_LQ_K_c42577/f1p5/2026	ARID	TR
i2_LQ_K_c47422/f1p3/2248	ARID	TR
i2_LQ_K_c5508/f1p1/2472	ARID	TR
i2_LQ_K_c55846/f1p12/2380	ARID	TR
i2_LQ_K_c56814/f1p2/2670	ARID	TR
i2_LQ_K_c104038/f1p133/3178	ARID	TR
i2_LQ_K_c104321/f1p94/2714	ARID	TR
i2_LQ_K_c106712/f1p130/2451	ARID	TR
i2_LQ_K_c107504/f1p0/2733	ARID	TR
i2_LQ_K_c113113/f1p5/2283	ARID	TR
i2_LQ_K_c118716/f1p11/2068	ARID	TR
i2_LQ_K_c14175/f1p5/2080	ARID	TR
i2_LQ_K_c67780/f1p5/2518	ARID	TR
i2_LQ_K_c94476/f1p11/2072	ARID	TR
i3_LQ_K_c14013/f1p54/3300	ARID	TR
i3_LQ_K_c14818/f1p1/3247	ARID	TR
i3_LQ_K_c15750/f1p0/3044	ARID	TR
i3_LQ_K_c15800/f1p0/3071	ARID	TR
i3_LQ_K_c19160/f1p0/3276	ARID	TR
i3_LQ_K_c21698/f1p2/3770	ARID	TR
i3_LQ_K_c22023/f1p6/3300	ARID	TR
i3_LQ_K_c22166/f1p0/3406	ARID	TR
i3_LQ_K_c26386/f1p14/3631	ARID	TR
i3_LQ_K_c26993/f1p1/3118	ARID	TR
i3_LQ_K_c27579/f1p0/3241	ARID	TR
i3_LQ_K_c27729/f1p16/3415	ARID	TR
i3_LQ_K_c29692/f1p0/3096	ARID	TR
i3_LQ_K_c35212/f1p24/3060	ARID	TR
i3_LQ_K_c4010/f1p0/3499	ARID	TR
i3_LQ_K_c29369/f1p1/4013	ARID	TR
i3_LQ_K_c30294/f1p39/3906	ARID	TR
i3_LQ_K_c30298/f1p0/3201	ARID	TR
i3_LQ_K_c36200/f1p3/3713	ARID	TR
i3_LQ_K_c37099/f1p0/3115	ARID	TR
i3_LQ_K_c44848/f1p0/3114	ARID	TR
i3_LQ_K_c46205/f1p0/3004	ARID	TR
i4_LQ_K_c2994/f1p1/4741	ARID	TR
i4_LQ_K_c4744/f1p0/4117	ARID	TR
i4_LQ_K_c25490/f1p0/4664	ARID	TR
i4_LQ_K_c25714/f1p64/4242	ARID	TR
i4_LQ_K_c26219/f1p0/4235	ARID	TR
i4_LQ_K_c26928/f1p0/4929	ARID	TR
i4_LQ_K_c28404/f1p2/4391	ARID	TR
i4_LQ_K_c28614/f1p0/4200	ARID	TR
i4_LQ_K_c28898/f1p0/4226	ARID	TR
i4_LQ_K_c31890/f1p0/4358	ARID	TR
i4_LQ_K_c38694/f1p2/4300	ARID	TR
i4_LQ_K_c40443/f1p0/4417	ARID	TR
i4_LQ_K_c41087/f1p1/4212	ARID	TR
i4_LQ_K_c43371/f1p0/4160	ARID	TR
i4_LQ_K_c46524/f1p1/4658	ARID	TR
i4_LQ_K_c58992/f1p0/4426	AUX/IAA	TR
i4_LQ_K_c59906/f1p4/4400	AUX/IAA	TR
i4_LQ_K_c60777/f1p12/4535	AUX/IAA	TR
i4_LQ_K_c61324/f1p0/4495	AUX/IAA	TR
i4_LQ_K_c62377/f1p0/4249	AUX/IAA	TR
i4_LQ_K_c62568/f1p0/4413	AUX/IAA	TR
i4_LQ_K_c63203/f1p0/4767	AUX/IAA	TR
i5_LQ_K_c10669/f1p0/5057	AUX/IAA	TR
i5_LQ_K_c4879/f1p0/5246	AUX/IAA	TR
i5_LQ_K_c6704/f1p0/5865	AUX/IAA	TR
i5_LQ_K_c9752/f1p0/5847	AUX/IAA	TR
i6_LQ_K_c1370/f1p0/6112	AUX/IAA	TR
i6_LQ_K_c1600/f1p5/6388	AUX/IAA	TR
i7_LQ_K_c358/f1p0/7259	AUX/IAA	TR
i0_HQ_K_c18331/f2p0/713	AUX/IAA	TR
i0_HQ_K_c1883/f6p196/868	AUX/IAA	TR
i0_HQ_K_c2365/f2p5/900	AUX/IAA	TR
i0_HQ_K_c33317/f13p0/976	AUX/IAA	TR
i0_HQ_K_c6687/f2p1/985	AUX/IAA	TR
i1_HQ_K_c10848/f3p3/1510	AUX/IAA	TR
i1_HQ_K_c12053/f3p1/1968	AUX/IAA	TR
i1_HQ_K_c12822/f3p15/1594	AUX/IAA	TR
i1_HQ_K_c13563/f2p3/1457	AUX/IAA	TR
i1_HQ_K_c14641/f4p0/1346	AUX/IAA	TR
i1_HQ_K_c14646/f2p3/1410	AUX/IAA	TR
i1_HQ_K_c1643/f5p9/1623	AUX/IAA	TR
i1_HQ_K_c17714/f4p0/1390	AUX/IAA	TR
i1_HQ_K_c1960/f3p0/1327	AUX/IAA	TR
i1_HQ_K_c22405/f3p0/1301	AUX/IAA	TR
i1_HQ_K_c25664/f2p11/1751	AUX/IAA	TR
i1_HQ_K_c3507/f3p5/1731	AUX/IAA	TR
i1_HQ_K_c45273/f3p3/1031	AUX/IAA	TR
i1_HQ_K_c47002/f3p2/1663	AUX/IAA	TR
i1_HQ_K_c51857/f2p2/1699	AUX/IAA	TR
i1_HQ_K_c5334/f3p0/1623	AUX/IAA	TR
i1_HQ_K_c56067/f2p5/1622	AUX/IAA	TR
i1_HQ_K_c57072/f2p0/1633	AUX/IAA	TR
i1_HQ_K_c67532/f2p1/1252	AUX/IAA	TR
i1_HQ_K_c69820/f2p1/1779	AUX/IAA	TR
i1_HQ_K_c79801/f2p1/1714	AUX/IAA	TR
i1_HQ_K_c86732/f11p3/1725	AUX/IAA	TR
i1_HQ_K_c86752/f8p8/1708	AUX/IAA	TR
i1_HQ_K_c87371/f37p1/1658	AUX/IAA	TR
i1_HQ_K_c87648/f3p14/1211	AUX/IAA	TR
i1_HQ_K_c87749/f6p0/1284	AUX/IAA	TR
i2_HQ_K_c146999/f3p2/2172	AUX/IAA	TR
i0_LQ_K_c19336/f1p0/939	AUX/IAA	TR
i0_LQ_K_c21210/f1p0/863	AUX/IAA	TR
i0_LQ_K_c22130/f1p0/533	AUX/IAA	TR
i0_LQ_K_c23868/f1p0/957	AUX/IAA	TR
i0_LQ_K_c2544/f2p0/719	AUX/IAA	TR
i0_LQ_K_c27080/f1p0/891	AUX/IAA	TR
i0_LQ_K_c28432/f1p0/457	AUX/IAA	TR
i0_LQ_K_c28707/f1p0/866	AUX/IAA	TR
i0_LQ_K_c4245/f1p5/875	AUX/IAA	TR
i0_LQ_K_c9931/f1p48/949	AUX/IAA	TR
i3_HQ_K_c2221/f2p1/3294	AUX/IAA	TR
i3_HQ_K_c24901/f3p5/3854	AUX/IAA	TR
i3_HQ_K_c6288/f2p6/3510	AUX/IAA	TR
i4_HQ_K_c21367/f2p0/4134	AUX/IAA	TR
i4_HQ_K_c31235/f2p0/4498	AUX/IAA	TR
i1_LQ_K_c10212/f1p8/1790	AUX/IAA	TR
i1_LQ_K_c13864/f1p0/1997	AUX/IAA	TR
i1_LQ_K_c14292/f1p1/1400	AUX/IAA	TR
i1_LQ_K_c15452/f1p1/1141	AUX/IAA	TR
i1_LQ_K_c15615/f1p1/1113	AUX/IAA	TR
i1_LQ_K_c20045/f1p0/1323	AUX/IAA	TR
i1_LQ_K_c20212/f1p3/1120	AUX/IAA	TR
i1_LQ_K_c21305/f1p3/1698	AUX/IAA	TR
i1_LQ_K_c22456/f1p16/1901	AUX/IAA	TR
i1_LQ_K_c23454/f1p1/1715	AUX/IAA	TR
i1_LQ_K_c24026/f1p0/1305	AUX/IAA	TR
i1_LQ_K_c24090/f1p1/1991	AUX/IAA	TR
i1_LQ_K_c24346/f1p0/1621	AUX/IAA	TR
i1_LQ_K_c26455/f1p1/1850	AUX/IAA	TR
i1_LQ_K_c28076/f2p0/1592	AUX/IAA	TR
i1_LQ_K_c28983/f1p2/1810	AUX/IAA	TR
i1_LQ_K_c30288/f1p0/1119	AUX/IAA	TR
i1_LQ_K_c34819/f1p0/1943	AUX/IAA	TR
i1_LQ_K_c34981/f1p2/1841	AUX/IAA	TR
i1_LQ_K_c35711/f1p1/1731	AUX/IAA	TR
i1_LQ_K_c36146/f1p0/1838	AUX/IAA	TR
i1_LQ_K_c38741/f1p2/1322	AUX/IAA	TR
i1_LQ_K_c39711/f1p4/1366	AUX/IAA	TR
i1_LQ_K_c41719/f1p2/1875	AUX/IAA	TR
i1_LQ_K_c41962/f1p3/1626	AUX/IAA	TR
i1_LQ_K_c41979/f1p4/1735	AUX/IAA	TR
i1_LQ_K_c42799/f1p0/1140	AUX/IAA	TR
i1_LQ_K_c43598/f1p1/1587	AUX/IAA	TR
i1_LQ_K_c47133/f1p0/1015	AUX/IAA	TR
i1_LQ_K_c47943/f1p0/1114	AUX/IAA	TR
i1_LQ_K_c52536/f1p3/1397	AUX/IAA	TR
i1_LQ_K_c52857/f1p1/1146	AUX/IAA	TR
i1_LQ_K_c54072/f1p0/1636	AUX/IAA	TR
i1_LQ_K_c7347/f1p5/1633	AUX/IAA	TR
i1_LQ_K_c7546/f1p2/1806	AUX/IAA	TR
i1_LQ_K_c9338/f1p2/1611	AUX/IAA	TR
i1_LQ_K_c9405/f1p2/1367	AUX/IAA	TR
i1_LQ_K_c53450/f1p3/1808	AUX/IAA	TR
i1_LQ_K_c58910/f1p2/1134	AUX/IAA	TR
i1_LQ_K_c70061/f1p0/1292	AUX/IAA	TR
i1_LQ_K_c70217/f1p2/1828	AUX/IAA	TR
i1_LQ_K_c70986/f1p1/1431	AUX/IAA	TR
i1_LQ_K_c72106/f1p4/1847	AUX/IAA	TR
i1_LQ_K_c72758/f1p1/1588	AUX/IAA	TR
i1_LQ_K_c74521/f1p1/1222	AUX/IAA	TR
i1_LQ_K_c77512/f1p0/1273	AUX/IAA	TR
i1_LQ_K_c77818/f1p19/1995	AUX/IAA	TR
i1_LQ_K_c77917/f1p3/1683	AUX/IAA	TR
i1_LQ_K_c80139/f1p6/1213	AUX/IAA	TR
i1_LQ_K_c96295/f1p1/1009	AUX/IAA	TR
i2_LQ_K_c12478/f1p1/2635	AUX/IAA	TR
i2_LQ_K_c12861/f1p5/2241	AUX/IAA	TR
i2_LQ_K_c132287/f1p6/3291	AUX/IAA	TR
i2_LQ_K_c24688/f1p1/2418	AUX/IAA	TR
i2_LQ_K_c157074/f1p14/2094	AUX/IAA	TR
i2_LQ_K_c158271/f1p0/2498	AUX/IAA	TR
i2_LQ_K_c31998/f1p1/2032	AUX/IAA	TR
i2_LQ_K_c33576/f1p25/2087	AUX/IAA	TR
i2_LQ_K_c40399/f1p1/2221	AUX/IAA	TR
i2_LQ_K_c45050/f1p0/2288	AUX/IAA	TR
i2_LQ_K_c45408/f1p17/2980	AUX/IAA	TR
i2_LQ_K_c47839/f1p0/2402	AUX/IAA	TR
i2_LQ_K_c59923/f1p0/2404	AUX/IAA	TR
i2_LQ_K_c61939/f1p1/2520	AUX/IAA	TR
i2_LQ_K_c102951/f1p7/2695	AUX/IAA	TR
i2_LQ_K_c107233/f1p5/2416	AUX/IAA	TR
i2_LQ_K_c110783/f1p0/2844	AUX/IAA	TR
i2_LQ_K_c111215/f1p0/2525	AUX/IAA	TR
i2_LQ_K_c111223/f1p0/2600	AUX/IAA	TR
i2_LQ_K_c121021/f1p2/2019	AUX/IAA	TR
i2_LQ_K_c133599/f1p140/2640	AUX/IAA	TR
i2_LQ_K_c71078/f1p0/2027	AUX/IAA	TR
i2_LQ_K_c78946/f1p5/2846	AUX/IAA	TR
i2_LQ_K_c79806/f1p0/2626	AUX/IAA	TR
i2_LQ_K_c80563/f1p5/2806	AUX/IAA	TR
i2_LQ_K_c82642/f1p4/2839	AUX/IAA	TR
i2_LQ_K_c84343/f1p3/2408	AUX/IAA	TR
i2_LQ_K_c87461/f1p0/2189	AUX/IAA	TR
i2_LQ_K_c94968/f1p3/2070	AUX/IAA	TR
i3_LQ_K_c4991/f1p2/3225	AUX/IAA	TR
i3_LQ_K_c7996/f1p4/3697	AUX/IAA	TR
i3_LQ_K_c11558/f1p1/3961	AUX/IAA	TR
i3_LQ_K_c14931/f1p2/3583	AUX/IAA	TR
i3_LQ_K_c21767/f1p0/3058	AUX/IAA	TR
i3_LQ_K_c23054/f1p0/3950	AUX/IAA	TR
i3_LQ_K_c25299/f1p3/3524	AUX/IAA	TR
i3_LQ_K_c35096/f1p0/3727	AUX/IAA	TR
i3_LQ_K_c35307/f1p0/3982	AUX/IAA	TR
i3_LQ_K_c35596/f1p0/3293	AUX/IAA	TR
i3_LQ_K_c37584/f1p8/3341	AUX/IAA	TR
i4_LQ_K_c20013/f1p0/4330	AUX/IAA	TR
i4_LQ_K_c21765/f1p17/4170	AUX/IAA	TR
i4_LQ_K_c24029/f1p3/5035	AUX/IAA	TR
i4_LQ_K_c4625/f1p0/4129	AUX/IAA	TR
i4_LQ_K_c5029/f1p0/4291	AUX/IAA	TR
i4_LQ_K_c20687/f1p2/4862	AUX/IAA	TR
i4_LQ_K_c23760/f1p0/4854	AUX/IAA	TR
i4_LQ_K_c26103/f1p37/4305	AUX/IAA	TR
i4_LQ_K_c26561/f1p2/4525	AUX/IAA	TR
i4_LQ_K_c33109/f1p0/4079	AUX/IAA	TR
i4_LQ_K_c37628/f1p0/4312	AUX/IAA	TR
i4_LQ_K_c42338/f1p9/4257	AUX/IAA	TR
i4_LQ_K_c42414/f1p3/4189	AUX/IAA	TR
i4_LQ_K_c42929/f1p0/4333	AUX/IAA	TR
i4_LQ_K_c47612/f1p0/4395	AUX/IAA	TR
i4_LQ_K_c53351/f1p0/4037	AUX/IAA	TR
i4_LQ_K_c58512/f1p2/4395	B3	TF
i4_LQ_K_c58704/f1p0/4294	B3	TF
i4_LQ_K_c60648/f1p2/4382	B3	TF
i4_LQ_K_c61228/f1p21/4617	B3	TF
i4_LQ_K_c61315/f1p0/4327	B3	TF
i4_LQ_K_c62624/f1p0/4192	B3	TF
i4_LQ_K_c63730/f1p0/4509	B3	TF
i4_LQ_K_c67178/f1p0/4037	B3	TF
i5_LQ_K_c5039/f1p5/5155	B3	TF
i6_LQ_K_c169/f1p0/6065	B3	TF
i8_LQ_K_c21/f1p0/8471	B3	TF
i1_HQ_K_c10024/f2p0/1654	B3	TF
i1_HQ_K_c12753/f5p1/1630	B3	TF
i1_HQ_K_c18114/f2p0/1925	B3	TF
i1_HQ_K_c39971/f2p0/1948	B3	TF
i1_HQ_K_c6178/f3p7/1541	B3	TF
i1_HQ_K_c866/f4p0/1587	B3	TF
i2_HQ_K_c22250/f4p2/2680	B3	TF
i2_HQ_K_c56595/f3p11/3135	B3	TF
i0_LQ_K_c11834/f1p0/660	B3	TF
i0_LQ_K_c3791/f1p37/810	B3	TF
i0_LQ_K_c5322/f1p0/972	B3	TF
i1_LQ_K_c3824/f1p0/1550	B3	TF
i3_HQ_K_c10249/f2p0/3689	B3	TF
i3_HQ_K_c12346/f2p1/3536	B3	TF
i3_HQ_K_c34792/f2p0/3269	B3	TF
i3_HQ_K_c40254/f2p1/3319	B3	TF
i3_HQ_K_c43615/f2p1/3103	B3	TF
i3_HQ_K_c6806/f2p1/3835	B3	TF
i4_HQ_K_c37343/f2p3/4651	B3	TF
i4_HQ_K_c6064/f3p0/4260	B3	TF
i1_LQ_K_c10510/f1p5/1445	B3	TF
i1_LQ_K_c11042/f1p0/1618	B3	TF
i1_LQ_K_c11759/f1p1/1722	B3	TF
i1_LQ_K_c12221/f1p2/1820	B3	TF
i1_LQ_K_c14264/f1p0/1823	B3	TF
i1_LQ_K_c20631/f1p0/1843	B3	TF
i1_LQ_K_c22889/f1p1/1904	B3	TF
i1_LQ_K_c25565/f1p0/1440	B3	TF
i1_LQ_K_c25853/f1p4/1421	B3	TF
i1_LQ_K_c27429/f1p0/1827	B3	TF
i1_LQ_K_c3724/f1p1/1954	B3	TF
i1_LQ_K_c37333/f1p2/1638	B3	TF
i1_LQ_K_c54522/f1p0/1819	B3	TF
i1_LQ_K_c57561/f1p1/1367	B3	TF
i1_LQ_K_c7987/f1p0/1616	B3	TF
i1_LQ_K_c61441/f1p0/1408	B3	TF
i1_LQ_K_c75105/f1p0/1454	B3	TF
i1_LQ_K_c79168/f1p7/1862	B3	TF
i2_LQ_K_c12734/f1p1/2771	B3	TF
i2_LQ_K_c12968/f1p0/2464	B3	TF
i2_LQ_K_c133989/f1p12/2675	B3	TF
i2_LQ_K_c134356/f1p0/2120	B3	TF
i2_LQ_K_c134432/f1p2/2804	B3	TF
i2_LQ_K_c143496/f1p3/2148	B3	TF
i2_LQ_K_c14765/f1p4/2969	B3	TF
i2_LQ_K_c151292/f1p2/2869	B3	TF
i2_LQ_K_c153734/f1p8/3001	B3	TF
i2_LQ_K_c22875/f1p1/2306	B3	TF
i2_LQ_K_c4002/f1p0/2181	B3	TF
i2_LQ_K_c45161/f1p9/3697	B3	TF
i2_LQ_K_c5040/f1p7/2675	B3	TF
i2_LQ_K_c7184/f1p4/2977	B3	TF
i2_LQ_K_c8431/f1p0/2108	B3	TF
i2_LQ_K_c115223/f1p0/2063	B3	TF
i2_LQ_K_c157740/f1p1/2937	B3	TF
i2_LQ_K_c173503/f1p10/2669	B3	TF
i2_LQ_K_c21659/f1p2/2771	B3	TF
i2_LQ_K_c26906/f1p0/2770	B3	TF
i2_LQ_K_c27425/f1p0/2279	B3	TF
i2_LQ_K_c29326/f2p2/2764	B3	TF
i2_LQ_K_c37557/f1p1/2910	B3	TF
i2_LQ_K_c37765/f1p0/2304	B3	TF
i2_LQ_K_c38233/f1p0/2315	B3	TF
i2_LQ_K_c41770/f1p1/2509	B3	TF
i2_LQ_K_c45855/f1p2/2901	B3	TF
i2_LQ_K_c47031/f1p3/2313	B3	TF
i2_LQ_K_c47350/f1p0/2654	B3	TF
i2_LQ_K_c57254/f1p1/2926	B3	TF
i2_LQ_K_c60221/f1p0/2475	B3	TF
i2_LQ_K_c63299/f1p5/3747	B3	TF
i2_LQ_K_c65634/f1p1/2962	B3	TF
i2_LQ_K_c66362/f1p0/2810	B3	TF
i2_LQ_K_c70535/f1p0/2035	B3	TF
i2_LQ_K_c104622/f1p4/2985	B3	TF
i2_LQ_K_c107332/f1p1/2522	B3	TF
i2_LQ_K_c107561/f1p0/2223	B3	TF
i2_LQ_K_c107801/f1p10/2977	B3	TF
i2_LQ_K_c108541/f1p1/2661	B3	TF
i2_LQ_K_c108936/f1p6/2612	B3	TF
i2_LQ_K_c112518/f1p6/2968	B3	TF
i2_LQ_K_c127082/f1p0/2265	B3	TF
i2_LQ_K_c156913/f1p0/2265	B3	TF
i2_LQ_K_c3363/f1p0/2369	B3	TF
i2_LQ_K_c80950/f1p0/2358	B3	TF
i2_LQ_K_c81825/f1p3/2802	B3	TF
i2_LQ_K_c85638/f1p0/2785	B3	TF
i2_LQ_K_c93933/f1p0/2048	B3	TF
i3_LQ_K_c2264/f1p2/3075	B3	TF
i3_LQ_K_c2480/f1p0/3341	B3	TF
i3_LQ_K_c3637/f1p0/3552	B3	TF
i3_LQ_K_c6611/f1p1/3909	B3	TF
i3_LQ_K_c10008/f2p35/3393	B3	TF
i3_LQ_K_c10741/f1p0/3298	B3	TF
i3_LQ_K_c11169/f1p0/3751	B3	TF
i3_LQ_K_c12025/f1p0/3132	B3	TF
i3_LQ_K_c15331/f1p1/3186	B3	TF
i3_LQ_K_c16028/f1p0/3013	B3	TF
i3_LQ_K_c16734/f1p0/3052	B3	TF
i3_LQ_K_c18732/f2p0/3299	B3	TF
i3_LQ_K_c20258/f1p0/3055	B3	TF
i3_LQ_K_c22225/f1p0/3856	B3	TF
i3_LQ_K_c22339/f1p10/3079	B3	TF
i3_LQ_K_c22866/f1p9/3359	B3	TF
i3_LQ_K_c24439/f1p1/3726	B3	TF
i3_LQ_K_c24826/f1p0/3241	B3	TF
i3_LQ_K_c25201/f1p1/3161	B3	TF
i3_LQ_K_c25355/f1p0/3231	B3	TF
i3_LQ_K_c25385/f1p13/3049	B3	TF
i3_LQ_K_c26000/f1p24/3632	B3	TF
i3_LQ_K_c26494/f1p0/3403	B3	TF
i3_LQ_K_c26794/f1p2/3357	B3	TF
i3_LQ_K_c27273/f1p10/3369	B3	TF
i3_LQ_K_c28008/f1p17/3610	B3	TF
i3_LQ_K_c28694/f1p2/3350	B3	TF
i3_LQ_K_c28802/f1p2/3162	B3	TF
i3_LQ_K_c29249/f1p0/3185	B3	TF
i3_LQ_K_c31580/f1p0/3029	B3	TF
i3_LQ_K_c35072/f1p0/3080	B3	TF
i3_LQ_K_c4097/f1p0/3257	B3	TF
i3_LQ_K_c4193/f1p5/3464	B3	TF
i3_LQ_K_c4376/f1p3/3456	B3	TF
i3_LQ_K_c5348/f1p0/3613	B3	TF
i3_LQ_K_c5819/f1p7/3623	B3	TF
i3_LQ_K_c7788/f1p1/3459	B3	TF
i3_LQ_K_c8191/f1p0/3737	B3	TF
i3_LQ_K_c8195/f1p0/3237	B3	TF
i3_LQ_K_c28157/f1p5/3697	B3	TF
i3_LQ_K_c30268/f1p5/3109	B3	TF
i3_LQ_K_c30356/f1p1/3493	B3	TF
i3_LQ_K_c30523/f1p1/3498	B3	TF
i3_LQ_K_c32456/f1p0/3046	B3	TF
i3_LQ_K_c34935/f1p1/3614	B3	TF
i3_LQ_K_c34985/f1p7/3166	B3	TF
i3_LQ_K_c35934/f1p2/3126	B3	TF
i3_LQ_K_c36199/f1p0/3326	B3	TF
i3_LQ_K_c37423/f1p0/3808	B3	TF
i3_LQ_K_c37456/f1p2/3144	B3	TF
i3_LQ_K_c37646/f1p0/3079	B3	TF
i3_LQ_K_c37986/f1p0/3252	B3	TF
i3_LQ_K_c38811/f1p0/3394	B3	TF
i3_LQ_K_c39599/f1p0/3376	B3	TF
i3_LQ_K_c39900/f1p2/3279	B3	TF
i3_LQ_K_c46154/f1p12/3009	B3	TF
i4_LQ_K_c10936/f1p1/4319	B3	TF
i4_LQ_K_c11881/f1p1/4679	B3	TF
i4_LQ_K_c14633/f1p0/4531	B3	TF
i4_LQ_K_c20099/f1p6/4228	B3	TF
i4_LQ_K_c23107/f1p2/4402	B3	TF
i4_LQ_K_c2314/f1p3/4507	B3	TF
i4_LQ_K_c24186/f1p8/4838	B3	TF
i4_LQ_K_c24359/f1p0/4267	B3	TF
i4_LQ_K_c2444/f1p38/4287	B3	TF
i4_LQ_K_c4186/f1p3/4226	B3	TF
i4_LQ_K_c5305/f1p1/4631	B3	TF
i4_LQ_K_c5411/f1p0/4154	B3	TF
i4_LQ_K_c7556/f1p12/4123	B3	TF
i4_LQ_K_c7834/f1p13/4879	B3	TF
i4_LQ_K_c7912/f1p3/4716	B3	TF
i4_LQ_K_c9278/f1p0/4133	B3	TF
i4_LQ_K_c26865/f1p2/4373	B3	TF
i4_LQ_K_c27560/f1p0/4866	B3	TF
i4_LQ_K_c29301/f1p0/4895	B3	TF
i4_LQ_K_c34658/f1p0/4093	B3	TF
i4_LQ_K_c42247/f1p2/4313	B3	TF
i4_LQ_K_c43056/f1p2/4109	B3	TF
i4_LQ_K_c43571/f1p2/4266	B3	TF
i4_LQ_K_c44059/f1p2/4425	B3	TF
i4_LQ_K_c45504/f1p1/4197	B3	TF
i4_LQ_K_c45764/f1p3/4232	B3	TF
i4_LQ_K_c45868/f1p1/4227	B3	TF
i4_LQ_K_c52223/f1p0/4074	B3	TF
i4_LQ_K_c56194/f1p14/4192	B3	TF
i4_LQ_K_c56381/f1p0/4647	B3	TF
i4_LQ_K_c57942/f1p2/4780	B3	TF
i4_LQ_K_c59429/f1p5/4522	B3-ARF	TF
i4_LQ_K_c59905/f1p3/4245	B3-ARF	TF
i4_LQ_K_c60913/f1p0/4137	B3-ARF	TF
i4_LQ_K_c62137/f1p0/4388	B3-ARF	TF
i4_LQ_K_c62172/f1p0/4366	B3-ARF	TF
i4_LQ_K_c63804/f1p0/4316	B3-ARF	TF
i4_LQ_K_c64002/f1p0/4901	B3-ARF	TF
i4_LQ_K_c66001/f1p1/4118	B3-ARF	TF
i4_LQ_K_c66397/f1p0/4027	B3-ARF	TF
i4_LQ_K_c67911/f1p35/4228	B3-ARF	TF
i4_LQ_K_c69851/f1p4/4550	B3-ARF	TF
i4_LQ_K_c70462/f1p8/4189	B3-ARF	TF
i4_LQ_K_c72196/f1p0/4024	B3-ARF	TF
i4_LQ_K_c72350/f1p3/4001	B3-ARF	TF
i4_LQ_K_c72563/f1p0/4004	B3-ARF	TF
i5_LQ_K_c4960/f1p36/5570	B3-ARF	TF
i5_LQ_K_c6424/f1p2/5371	B3-ARF	TF
i5_LQ_K_c8244/f1p0/5061	B3-ARF	TF
i5_LQ_K_c8258/f1p0/5863	B3-ARF	TF
i6_LQ_K_c1395/f1p0/6512	B3-ARF	TF
i6_LQ_K_c384/f1p2/6498	B3-ARF	TF
i6_LQ_K_c710/f1p0/6708	B3-ARF	TF
i7_LQ_K_c345/f1p0/7181	B3-ARF	TF
i7_LQ_K_c524/f1p0/7339	B3-ARF	TF
i8_LQ_K_c83/f1p0/8262	B3-ARF	TF
i9_LQ_K_c40/f1p4/9729	B3-ARF	TF
i2_HQ_K_c12805/f9p5/2658	B3-ARF	TF
i2_HQ_K_c147899/f39p6/2753	B3-ARF	TF
i2_HQ_K_c15046/f3p8/2843	B3-ARF	TF
i2_HQ_K_c171070/f5p9/3689	B3-ARF	TF
i2_HQ_K_c172317/f10p0/2707	B3-ARF	TF
i2_HQ_K_c172490/f94p3/2819	B3-ARF	TF
i2_HQ_K_c23099/f4p7/2572	B3-ARF	TF
i2_HQ_K_c26408/f16p1/2928	B3-ARF	TF
i2_HQ_K_c36330/f2p1/2975	B3-ARF	TF
i2_HQ_K_c3819/f5p0/2783	B3-ARF	TF
i2_HQ_K_c45257/f3p1/2800	B3-ARF	TF
i2_HQ_K_c45431/f4p0/2610	B3-ARF	TF
i2_HQ_K_c4647/f3p2/2871	B3-ARF	TF
i2_HQ_K_c5315/f2p0/2765	B3-ARF	TF
i2_HQ_K_c53247/f8p5/2731	B3-ARF	TF
i2_HQ_K_c55936/f2p6/3204	B3-ARF	TF
i2_HQ_K_c66637/f2p0/2835	B3-ARF	TF
i2_HQ_K_c77212/f2p6/3088	B3-ARF	TF
i2_HQ_K_c84400/f2p0/2954	B3-ARF	TF
i2_HQ_K_c41299/f2p1/2829	B3-ARF	TF
i3_HQ_K_c15514/f2p0/3278	B3-ARF	TF
i3_HQ_K_c1732/f2p0/4000	B3-ARF	TF
i3_HQ_K_c17583/f4p0/3262	B3-ARF	TF
i3_HQ_K_c17586/f5p0/3171	B3-ARF	TF
i3_HQ_K_c18877/f2p0/3447	B3-ARF	TF
i3_HQ_K_c1894/f3p1/3180	B3-ARF	TF
i3_HQ_K_c1967/f8p4/3645	B3-ARF	TF
i3_HQ_K_c22390/f2p0/3263	B3-ARF	TF
i3_HQ_K_c2382/f3p0/3094	B3-ARF	TF
i3_HQ_K_c28776/f2p2/3127	B3-ARF	TF
i3_HQ_K_c3149/f2p58/3370	B3-ARF	TF
i3_HQ_K_c3254/f2p1/3352	B3-ARF	TF
i3_HQ_K_c33868/f3p2/3201	B3-ARF	TF
i3_HQ_K_c43318/f4p0/3161	B3-ARF	TF
i3_HQ_K_c43349/f3p0/3353	B3-ARF	TF
i3_HQ_K_c43902/f5p0/3109	B3-ARF	TF
i3_HQ_K_c43919/f33p5/3292	B3-ARF	TF
i3_HQ_K_c46044/f9p0/3475	B3-ARF	TF
i3_HQ_K_c499/f14p0/3619	B3-ARF	TF
i3_HQ_K_c5166/f2p24/3815	B3-ARF	TF
i3_HQ_K_c8101/f2p0/3138	B3-ARF	TF
i3_HQ_K_c872/f3p0/3423	B3-ARF	TF
i4_HQ_K_c10421/f6p5/4385	B3-ARF	TF
i4_HQ_K_c1733/f2p11/4348	B3-ARF	TF
i4_HQ_K_c17824/f6p0/4279	B3-ARF	TF
i4_HQ_K_c21232/f3p0/4448	B3-ARF	TF
i4_HQ_K_c23089/f2p1/4135	B3-ARF	TF
i4_HQ_K_c29114/f2p1/4619	B3-ARF	TF
i4_HQ_K_c30099/f2p7/4328	B3-ARF	TF
i4_HQ_K_c3388/f4p3/4268	B3-ARF	TF
i4_HQ_K_c34820/f10p0/4296	B3-ARF	TF
i4_HQ_K_c37238/f2p11/4548	B3-ARF	TF
i4_HQ_K_c40434/f2p2/4140	B3-ARF	TF
i4_HQ_K_c45587/f2p3/4255	B3-ARF	TF
i4_HQ_K_c4851/f3p2/4388	B3-ARF	TF
i4_HQ_K_c53758/f5p0/4088	B3-ARF	TF
i4_HQ_K_c5945/f6p0/4256	B3-ARF	TF
i4_HQ_K_c68870/f3p0/4075	B3-ARF	TF
i4_HQ_K_c69121/f50p0/4555	B3-ARF	TF
i4_HQ_K_c69186/f98p0/4414	B3-ARF	TF
i4_HQ_K_c760/f17p0/4383	B3-ARF	TF
i4_HQ_K_c9804/f2p2/4395	B3-ARF	TF
i2_LQ_K_c10095/f1p9/2658	B3-ARF	TF
i2_LQ_K_c11793/f1p2/3021	B3-ARF	TF
i2_LQ_K_c12028/f1p5/2785	B3-ARF	TF
i2_LQ_K_c12947/f1p7/2984	B3-ARF	TF
i2_LQ_K_c13166/f1p1/2549	B3-ARF	TF
i2_LQ_K_c133397/f1p1/2875	B3-ARF	TF
i2_LQ_K_c133635/f1p6/2937	B3-ARF	TF
i2_LQ_K_c134650/f1p0/2184	B3-ARF	TF
i2_LQ_K_c136637/f1p4/2862	B3-ARF	TF
i2_LQ_K_c14288/f1p4/2580	B3-ARF	TF
i2_LQ_K_c14650/f3p4/2766	B3-ARF	TF
i2_LQ_K_c151538/f1p26/2047	B3-ARF	TF
i2_LQ_K_c15357/f1p1/2752	B3-ARF	TF
i2_LQ_K_c19175/f1p4/2946	B3-ARF	TF
i2_LQ_K_c4542/f1p1/2633	B3-ARF	TF
i2_LQ_K_c4910/f1p2/2825	B3-ARF	TF
i2_LQ_K_c5152/f1p1/2276	B3-ARF	TF
i2_LQ_K_c137350/f1p23/2097	B3-ARF	TF
i2_LQ_K_c142469/f1p0/2072	B3-ARF	TF
i2_LQ_K_c14741/f1p0/2725	B3-ARF	TF
i2_LQ_K_c155054/f1p1/2920	B3-ARF	TF
i2_LQ_K_c160405/f1p4/2913	B3-ARF	TF
i2_LQ_K_c161270/f1p4/2940	B3-ARF	TF
i2_LQ_K_c180390/f1p0/2655	B3-ARF	TF
i2_LQ_K_c20792/f1p5/2841	B3-ARF	TF
i2_LQ_K_c20897/f1p10/3004	B3-ARF	TF
i2_LQ_K_c24549/f1p25/2785	B3-ARF	TF
i2_LQ_K_c25164/f1p11/2732	B3-ARF	TF
i2_LQ_K_c25739/f1p4/2340	B3-ARF	TF
i2_LQ_K_c26954/f1p15/2745	B3-ARF	TF
i2_LQ_K_c28908/f1p18/2819	B3-ARF	TF
i2_LQ_K_c30398/f1p1/2884	B3-ARF	TF
i2_LQ_K_c38097/f1p3/2379	B3-ARF	TF
i2_LQ_K_c38889/f1p3/2827	B3-ARF	TF
i2_LQ_K_c39804/f1p2/2855	B3-ARF	TF
i2_LQ_K_c41601/f1p9/2699	B3-ARF	TF
i2_LQ_K_c44106/f1p2/2785	B3-ARF	TF
i2_LQ_K_c46774/f1p1/2840	B3-ARF	TF
i2_LQ_K_c48295/f1p3/3061	B3-ARF	TF
i2_LQ_K_c56271/f1p12/3078	B3-ARF	TF
i2_LQ_K_c58846/f1p3/2603	B3-ARF	TF
i2_LQ_K_c58908/f1p7/2876	B3-ARF	TF
i2_LQ_K_c59472/f1p4/2794	B3-ARF	TF
i2_LQ_K_c59866/f1p1/2984	B3-ARF	TF
i2_LQ_K_c63091/f1p1/2921	B3-ARF	TF
i2_LQ_K_c63127/f1p1/2296	B3-ARF	TF
i2_LQ_K_c65881/f1p3/2720	B3-ARF	TF
i2_LQ_K_c78716/f1p4/2868	B3-ARF	TF
i2_LQ_K_c102560/f1p29/3178	B3-ARF	TF
i2_LQ_K_c104817/f1p0/2566	B3-ARF	TF
i2_LQ_K_c106263/f1p4/2763	B3-ARF	TF
i2_LQ_K_c113299/f1p0/2330	B3-ARF	TF
i2_LQ_K_c129153/f1p7/2715	B3-ARF	TF
i2_LQ_K_c156385/f1p4/2998	B3-ARF	TF
i2_LQ_K_c157950/f1p3/2557	B3-ARF	TF
i2_LQ_K_c40120/f3p9/2775	B3-ARF	TF
i2_LQ_K_c41080/f1p0/2900	B3-ARF	TF
i2_LQ_K_c67950/f1p5/2841	B3-ARF	TF
i2_LQ_K_c78043/f1p10/2308	B3-ARF	TF
i2_LQ_K_c79942/f1p25/2600	B3-ARF	TF
i2_LQ_K_c80977/f2p8/2920	B3-ARF	TF
i2_LQ_K_c84683/f1p0/2550	B3-ARF	TF
i2_LQ_K_c85219/f1p29/2968	B3-ARF	TF
i2_LQ_K_c86769/f1p1/2362	B3-ARF	TF
i2_LQ_K_c87599/f1p1/3016	B3-ARF	TF
i3_LQ_K_c4942/f1p5/3280	B3-ARF	TF
i3_LQ_K_c5026/f1p0/3824	B3-ARF	TF
i3_LQ_K_c5200/f1p2/3209	B3-ARF	TF
i3_LQ_K_c10003/f2p1/3574	B3-ARF	TF
i3_LQ_K_c10531/f1p4/3269	B3-ARF	TF
i3_LQ_K_c10955/f1p1/3354	B3-ARF	TF
i3_LQ_K_c11489/f1p0/3779	B3-ARF	TF
i3_LQ_K_c11662/f1p1/3320	B3-ARF	TF
i3_LQ_K_c11991/f1p1/3644	B3-ARF	TF
i3_LQ_K_c12138/f1p2/3176	B3-ARF	TF
i3_LQ_K_c12861/f1p5/3172	B3-ARF	TF
i3_LQ_K_c13164/f1p0/3708	B3-ARF	TF
i3_LQ_K_c13940/f1p8/3581	B3-ARF	TF
i3_LQ_K_c16886/f1p0/3044	B3-ARF	TF
i3_LQ_K_c17017/f1p8/3019	B3-ARF	TF
i3_LQ_K_c18638/f2p0/3291	B3-ARF	TF
i3_LQ_K_c18814/f3p4/3136	B3-ARF	TF
i3_LQ_K_c19731/f1p1/3501	B3-ARF	TF
i3_LQ_K_c19890/f1p3/3677	B3-ARF	TF
i3_LQ_K_c20165/f1p0/3229	B3-ARF	TF
i3_LQ_K_c20910/f1p6/3304	B3-ARF	TF
i3_LQ_K_c21388/f1p14/3573	B3-ARF	TF
i3_LQ_K_c21501/f1p0/3110	B3-ARF	TF
i3_LQ_K_c21518/f1p1/3228	B3-ARF	TF
i3_LQ_K_c21751/f1p54/3263	B3-ARF	TF
i3_LQ_K_c21920/f1p0/3196	B3-ARF	TF
i3_LQ_K_c22259/f1p0/3410	B3-ARF	TF
i3_LQ_K_c22302/f1p1/3603	B3-ARF	TF
i3_LQ_K_c23622/f1p0/3193	B3-ARF	TF
i3_LQ_K_c23854/f1p2/3724	B3-ARF	TF
i3_LQ_K_c24464/f1p0/3310	B3-ARF	TF
i3_LQ_K_c24490/f1p1/3884	B3-ARF	TF
i3_LQ_K_c24556/f1p5/3566	B3-ARF	TF
i3_LQ_K_c24727/f1p0/3938	B3-ARF	TF
i3_LQ_K_c24763/f1p23/3466	B3-ARF	TF
i3_LQ_K_c24799/f1p2/3145	B3-ARF	TF
i3_LQ_K_c24834/f1p1/3152	B3-ARF	TF
i3_LQ_K_c25072/f1p1/3100	B3-ARF	TF
i3_LQ_K_c26486/f1p1/3957	B3-ARF	TF
i3_LQ_K_c2771/f1p0/3934	B3-ARF	TF
i3_LQ_K_c28224/f1p0/3413	B3-ARF	TF
i3_LQ_K_c28958/f1p0/3442	B3-ARF	TF
i3_LQ_K_c29047/f1p0/3709	B3-ARF	TF
i3_LQ_K_c29092/f1p11/3183	B3-ARF	TF
i3_LQ_K_c35121/f1p0/3071	B3-ARF	TF
i3_LQ_K_c4180/f1p0/3304	B3-ARF	TF
i3_LQ_K_c4268/f1p0/3175	B3-ARF	TF
i3_LQ_K_c4794/f1p2/3296	B3-ARF	TF
i3_LQ_K_c4840/f1p0/3859	B3-ARF	TF
i3_LQ_K_c6399/f1p2/3583	B3-ARF	TF
i3_LQ_K_c6993/f1p0/3199	B3-ARF	TF
i3_LQ_K_c7262/f1p2/3581	B3-ARF	TF
i3_LQ_K_c7383/f1p3/3929	B3-ARF	TF
i3_LQ_K_c7509/f1p0/3240	B3-ARF	TF
i3_LQ_K_c7820/f1p2/3179	B3-ARF	TF
i3_LQ_K_c8154/f1p0/3495	B3-ARF	TF
i3_LQ_K_c8465/f1p0/3177	B3-ARF	TF
i3_LQ_K_c8835/f1p2/3258	B3-ARF	TF
i3_LQ_K_c8881/f1p30/3380	B3-ARF	TF
i3_LQ_K_c9530/f1p0/3581	B3-ARF	TF
i3_LQ_K_c9676/f1p0/3077	B3-ARF	TF
i3_LQ_K_c28095/f1p1/3123	B3-ARF	TF
i3_LQ_K_c29391/f1p0/3212	B3-ARF	TF
i3_LQ_K_c30114/f1p1/4012	B3-ARF	TF
i3_LQ_K_c30573/f1p0/3656	B3-ARF	TF
i3_LQ_K_c32800/f1p0/3030	B3-ARF	TF
i3_LQ_K_c33350/f1p0/3053	B3-ARF	TF
i3_LQ_K_c34398/f1p0/3294	B3-ARF	TF
i3_LQ_K_c34999/f1p0/3783	B3-ARF	TF
i3_LQ_K_c36180/f1p0/3985	B3-ARF	TF
i3_LQ_K_c37122/f1p0/3366	B3-ARF	TF
i3_LQ_K_c37209/f1p0/3943	B3-ARF	TF
i3_LQ_K_c37734/f1p4/3465	B3-ARF	TF
i3_LQ_K_c38196/f1p6/3697	B3-ARF	TF
i3_LQ_K_c38793/f1p10/3121	B3-ARF	TF
i3_LQ_K_c38903/f1p0/3099	B3-ARF	TF
i3_LQ_K_c39291/f1p1/3703	B3-ARF	TF
i3_LQ_K_c39535/f1p0/3391	B3-ARF	TF
i3_LQ_K_c40345/f1p0/3333	B3-ARF	TF
i3_LQ_K_c42989/f1p0/3025	B3-ARF	TF
i3_LQ_K_c45354/f1p6/3054	B3-ARF	TF
i3_LQ_K_c46269/f1p6/3031	B3-ARF	TF
i4_LQ_K_c10085/f1p26/4839	B3-ARF	TF
i4_LQ_K_c10169/f1p5/4548	B3-ARF	TF
i4_LQ_K_c11083/f1p2/4453	B3-ARF	TF
i4_LQ_K_c11271/f1p0/4702	B3-ARF	TF
i4_LQ_K_c11635/f1p9/4524	B3-ARF	TF
i4_LQ_K_c11852/f1p0/4344	B3-ARF	TF
i4_LQ_K_c12105/f1p0/4265	B3-ARF	TF
i4_LQ_K_c12217/f1p7/4645	B3-ARF	TF
i4_LQ_K_c12505/f1p3/4577	B3-ARF	TF
i4_LQ_K_c12729/f1p3/4577	B3-ARF	TF
i4_LQ_K_c13097/f1p1/4421	B3-ARF	TF
i4_LQ_K_c13551/f1p0/4223	B3-ARF	TF
i4_LQ_K_c13840/f1p0/4399	B3-ARF	TF
i4_LQ_K_c14184/f1p62/4745	B3-ARF	TF
i4_LQ_K_c14701/f1p7/4244	B3-ARF	TF
i4_LQ_K_c15415/f1p6/4579	B3-ARF	TF
i4_LQ_K_c16211/f1p0/4057	B3-ARF	TF
i4_LQ_K_c16223/f1p4/4068	B3-ARF	TF
i4_LQ_K_c16372/f1p0/4056	B3-ARF	TF
i4_LQ_K_c16932/f1p0/4033	B3-ARF	TF
i4_LQ_K_c17775/f1p0/4325	B3-ARF	TF
i4_LQ_K_c19725/f1p7/4244	B3-ARF	TF
i4_LQ_K_c20382/f1p0/4201	B3-ARF	TF
i4_LQ_K_c21504/f1p3/4199	B3-ARF	TF
i4_LQ_K_c21579/f1p2/4990	B3-ARF	TF
i4_LQ_K_c21781/f1p1/4702	B3-ARF	TF
i4_LQ_K_c23000/f1p4/4639	B3-ARF	TF
i4_LQ_K_c24299/f1p2/4663	B3-ARF	TF
i4_LQ_K_c2478/f1p0/4241	B3-ARF	TF
i4_LQ_K_c2693/f1p0/4279	B3-ARF	TF
i4_LQ_K_c2820/f1p0/4414	B3-ARF	TF
i4_LQ_K_c4795/f1p1/4221	B3-ARF	TF
i4_LQ_K_c6745/f1p2/4139	B3-ARF	TF
i4_LQ_K_c8167/f1p0/4452	B3-ARF	TF
i4_LQ_K_c8246/f1p3/4365	B3-ARF	TF
i4_LQ_K_c8565/f1p0/4425	B3-ARF	TF
i4_LQ_K_c9543/f1p1/4308	B3-ARF	TF
i4_LQ_K_c9751/f1p7/4744	B3-ARF	TF
i4_LQ_K_c23602/f1p4/4295	B3-ARF	TF
i4_LQ_K_c24580/f1p4/4263	B3-ARF	TF
i4_LQ_K_c24719/f1p8/4285	B3-ARF	TF
i4_LQ_K_c24851/f1p5/4377	B3-ARF	TF
i4_LQ_K_c25081/f1p1/4482	B3-ARF	TF
i4_LQ_K_c27566/f1p1/4163	B3-ARF	TF
i4_LQ_K_c27765/f1p1/4289	B3-ARF	TF
i4_LQ_K_c27794/f1p0/4382	B3-ARF	TF
i4_LQ_K_c27954/f1p1/4234	B3-ARF	TF
i4_LQ_K_c29904/f1p3/4680	B3-ARF	TF
i4_LQ_K_c30246/f1p6/4582	B3-ARF	TF
i4_LQ_K_c30255/f1p0/4553	B3-ARF	TF
i4_LQ_K_c30368/f1p0/4149	B3-ARF	TF
i4_LQ_K_c30700/f1p0/4475	B3-ARF	TF
i4_LQ_K_c31188/f1p0/4305	B3-ARF	TF
i4_LQ_K_c31317/f1p0/4969	B3-ARF	TF
i4_LQ_K_c31447/f1p0/4232	B3-ARF	TF
i4_LQ_K_c31843/f1p0/4882	B3-ARF	TF
i4_LQ_K_c33270/f1p5/4070	B3-ARF	TF
i4_LQ_K_c33461/f1p0/4075	B3-ARF	TF
i4_LQ_K_c38028/f1p0/4228	B3-ARF	TF
i4_LQ_K_c38679/f1p1/4182	B3-ARF	TF
i4_LQ_K_c39053/f1p0/4745	B3-ARF	TF
i4_LQ_K_c39785/f1p8/4230	B3-ARF	TF
i4_LQ_K_c40747/f1p10/4493	B3-ARF	TF
i4_LQ_K_c40757/f1p4/4234	B3-ARF	TF
i4_LQ_K_c41058/f1p0/4845	B3-ARF	TF
i4_LQ_K_c41144/f1p0/4174	B3-ARF	TF
i4_LQ_K_c41371/f1p3/4112	B3-ARF	TF
i4_LQ_K_c42656/f1p3/4390	B3-ARF	TF
i4_LQ_K_c42780/f1p0/4377	B3-ARF	TF
i4_LQ_K_c43617/f1p2/4186	B3-ARF	TF
i4_LQ_K_c43669/f1p1/4968	B3-ARF	TF
i4_LQ_K_c43753/f1p8/4358	B3-ARF	TF
i4_LQ_K_c43824/f1p4/4749	B3-ARF	TF
i4_LQ_K_c44106/f1p2/4460	B3-ARF	TF
i4_LQ_K_c45070/f1p11/4402	B3-ARF	TF
i4_LQ_K_c45180/f1p2/4343	B3-ARF	TF
i4_LQ_K_c45536/f1p0/4214	B3-ARF	TF
i4_LQ_K_c46534/f1p30/4362	B3-ARF	TF
i4_LQ_K_c46970/f1p0/4395	B3-ARF	TF
i4_LQ_K_c47162/f1p0/4798	B3-ARF	TF
i4_LQ_K_c47638/f1p7/4494	B3-ARF	TF
i4_LQ_K_c47829/f1p2/4496	B3-ARF	TF
i4_LQ_K_c48199/f1p35/4483	B3-ARF	TF
i4_LQ_K_c53394/f1p1/4036	B3-ARF	TF
i4_LQ_K_c56553/f1p2/4825	B3-ARF	TF
i4_LQ_K_c57817/f1p5/4502	B3-ARF	TF
i4_LQ_K_c59202/f1p1/4201	B3-ARF	TF
i4_LQ_K_c59247/f1p0/4421	B3-ARF	TF
i4_LQ_K_c57289/f1p0/4836	BBR-BPC	TF
i4_LQ_K_c58840/f1p1/4357	BBR-BPC	TF
i4_LQ_K_c58996/f1p1/4528	BBR-BPC	TF
i4_LQ_K_c61581/f1p0/4871	BBR-BPC	TF
i5_LQ_K_c2631/f1p1/5911	BBR-BPC	TF
i5_LQ_K_c7981/f1p1/5560	BBR-BPC	TF
i6_LQ_K_c939/f1p0/6470	BBR-BPC	TF
i1_HQ_K_c13728/f2p0/1399	BBR-BPC	TF
i1_HQ_K_c14912/f4p0/1516	BBR-BPC	TF
i1_HQ_K_c17631/f8p1/1705	BBR-BPC	TF
i1_HQ_K_c2316/f4p6/1621	BBR-BPC	TF
i1_HQ_K_c24267/f2p0/1403	BBR-BPC	TF
i1_HQ_K_c24774/f2p3/1887	BBR-BPC	TF
i1_HQ_K_c27450/f2p18/1871	BBR-BPC	TF
i1_HQ_K_c33843/f2p3/1929	BBR-BPC	TF
i1_HQ_K_c49937/f4p3/1751	BBR-BPC	TF
i1_HQ_K_c8694/f5p8/1834	BBR-BPC	TF
i1_HQ_K_c9450/f2p0/1524	BBR-BPC	TF
i2_HQ_K_c1129/f5p1/2829	BBR-BPC	TF
i0_LQ_K_c10371/f1p0/682	BBR-BPC	TF
i0_LQ_K_c27631/f1p1/399	BBR-BPC	TF
i4_HQ_K_c1823/f3p1/4578	BBR-BPC	TF
i4_HQ_K_c1874/f5p7/4439	BBR-BPC	TF
i4_HQ_K_c24127/f2p0/4818	BBR-BPC	TF
i1_LQ_K_c16192/f1p1/1034	BBR-BPC	TF
i1_LQ_K_c19129/f1p0/1546	BBR-BPC	TF
i1_LQ_K_c27541/f1p0/1678	BBR-BPC	TF
i1_LQ_K_c28413/f1p0/1766	BBR-BPC	TF
i1_LQ_K_c34711/f1p3/1857	BBR-BPC	TF
i1_LQ_K_c35921/f1p4/1566	BBR-BPC	TF
i1_LQ_K_c35949/f1p0/1389	BBR-BPC	TF
i1_LQ_K_c38123/f1p2/1361	BBR-BPC	TF
i1_LQ_K_c51436/f1p1/1735	BBR-BPC	TF
i1_LQ_K_c5234/f1p5/1915	BBR-BPC	TF
i1_LQ_K_c52754/f1p0/1711	BBR-BPC	TF
i1_LQ_K_c8513/f1p0/1570	BBR-BPC	TF
i1_LQ_K_c8841/f1p2/1618	BBR-BPC	TF
i1_LQ_K_c58356/f1p0/1519	BBR-BPC	TF
i1_LQ_K_c58464/f1p0/1682	BBR-BPC	TF
i1_LQ_K_c61483/f1p1/1463	BBR-BPC	TF
i1_LQ_K_c76684/f1p0/1788	BBR-BPC	TF
i1_LQ_K_c78013/f1p3/1679	BBR-BPC	TF
i2_LQ_K_c134113/f1p14/2711	BBR-BPC	TF
i2_LQ_K_c13723/f1p14/2917	BBR-BPC	TF
i2_LQ_K_c39934/f1p5/2262	BBR-BPC	TF
i2_LQ_K_c151780/f1p15/2584	BBR-BPC	TF
i2_LQ_K_c183727/f1p12/2022	BBR-BPC	TF
i2_LQ_K_c184854/f1p4/2007	BBR-BPC	TF
i2_LQ_K_c23108/f1p12/2922	BBR-BPC	TF
i2_LQ_K_c38002/f1p1/2842	BBR-BPC	TF
i2_LQ_K_c50416/f1p12/2056	BBR-BPC	TF
i2_LQ_K_c5589/f1p12/2571	BBR-BPC	TF
i2_LQ_K_c57273/f1p11/2920	BBR-BPC	TF
i2_LQ_K_c58462/f1p7/2916	BBR-BPC	TF
i2_LQ_K_c60950/f1p8/2524	BBR-BPC	TF
i2_LQ_K_c62425/f1p38/2630	BBR-BPC	TF
i2_LQ_K_c106331/f1p7/2976	BBR-BPC	TF
i2_LQ_K_c106804/f1p0/2600	BBR-BPC	TF
i2_LQ_K_c107218/f1p7/2628	BBR-BPC	TF
i2_LQ_K_c93592/f1p11/1979	BBR-BPC	TF
i3_LQ_K_c14436/f1p1/3641	BBR-BPC	TF
i3_LQ_K_c14610/f1p0/3649	BBR-BPC	TF
i3_LQ_K_c24332/f1p0/3666	BBR-BPC	TF
i3_LQ_K_c26894/f1p0/3687	BBR-BPC	TF
i3_LQ_K_c29076/f1p1/3483	BBR-BPC	TF
i3_LQ_K_c38590/f1p0/3682	BBR-BPC	TF
i4_LQ_K_c10324/f1p21/4679	BBR-BPC	TF
i4_LQ_K_c6994/f1p118/4758	BBR-BPC	TF
i4_LQ_K_c20633/f1p0/4501	BBR-BPC	TF
i4_LQ_K_c31537/f1p0/4344	BBR-BPC	TF
i4_LQ_K_c39479/f1p1/4567	BBR-BPC	TF
i4_LQ_K_c39762/f1p0/4809	BBR-BPC	TF
i4_LQ_K_c43116/f1p3/4351	BBR-BPC	TF
i4_LQ_K_c45695/f1p0/4599	BBR-BPC	TF
i4_LQ_K_c63110/f1p0/4846	BES1	TF
i1_HQ_K_c22876/f2p12/1442	BES1	TF
i1_HQ_K_c25672/f2p0/1548	BES1	TF
i2_HQ_K_c106021/f2p1/2205	BES1	TF
i2_HQ_K_c22635/f5p1/2266	BES1	TF
i2_HQ_K_c43190/f2p3/2902	BES1	TF
i2_HQ_K_c55632/f2p3/2985	BES1	TF
i3_HQ_K_c772/f7p0/3111	BES1	TF
i1_LQ_K_c18492/f1p0/1415	BES1	TF
i1_LQ_K_c19320/f1p0/1253	BES1	TF
i1_LQ_K_c26570/f1p1/1652	BES1	TF
i1_LQ_K_c43770/f1p0/1810	BES1	TF
i1_LQ_K_c73981/f1p0/1622	BES1	TF
i2_LQ_K_c24005/f1p3/3349	BES1	TF
i2_LQ_K_c7059/f1p3/3125	BES1	TF
i2_LQ_K_c7652/f1p0/2326	BES1	TF
i2_LQ_K_c155313/f1p0/2348	BES1	TF
i2_LQ_K_c25846/f1p0/2663	BES1	TF
i2_LQ_K_c26450/f1p1/2326	BES1	TF
i2_LQ_K_c4756/f2p1/2278	BES1	TF
i2_LQ_K_c59441/f1p3/2833	BES1	TF
i2_LQ_K_c64568/f1p1/2692	BES1	TF
i2_LQ_K_c100850/f1p1/2294	BES1	TF
i2_LQ_K_c107040/f1p1/2362	BES1	TF
i2_LQ_K_c130483/f1p0/2444	BES1	TF
i2_LQ_K_c84292/f1p0/2119	BES1	TF
i2_LQ_K_c91945/f1p1/2051	BES1	TF
i3_LQ_K_c3697/f1p2/3642	BES1	TF
i3_LQ_K_c16666/f1p0/3014	BES1	TF
i3_LQ_K_c19817/f1p1/3401	BES1	TF
i3_LQ_K_c24612/f1p0/3217	BES1	TF
i3_LQ_K_c28484/f1p2/3284	BES1	TF
i3_LQ_K_c6237/f1p2/3850	BES1	TF
i3_LQ_K_c7112/f1p1/3901	BES1	TF
i3_LQ_K_c32567/f1p0/3021	BES1	TF
i3_LQ_K_c39636/f1p0/3243	BES1	TF
i4_LQ_K_c19982/f1p5/4409	BES1	TF
i4_LQ_K_c31028/f1p0/4768	BES1	TF
i4_LQ_K_c47391/f1p5/4402	BES1	TF
i4_LQ_K_c49449/f1p1/4481	BES1	TF
i4_LQ_K_c48588/f1p0/4829	bHLH	TF
i4_LQ_K_c57106/f1p27/4122	bHLH	TF
i4_LQ_K_c60016/f1p0/4575	bHLH	TF
i4_LQ_K_c72413/f1p0/4014	bHLH	TF
i5_LQ_K_c2565/f1p2/5297	bHLH	TF
i5_LQ_K_c3793/f1p0/5535	bHLH	TF
i5_LQ_K_c9488/f1p0/5810	bHLH	TF
i5_LQ_K_c9787/f1p0/5182	bHLH	TF
i0_HQ_K_c2217/f4p1/998	bHLH	TF
i0_HQ_K_c2490/f3p11/868	bHLH	TF
i1_HQ_K_c10488/f2p2/1395	bHLH	TF
i1_HQ_K_c13403/f3p0/1664	bHLH	TF
i1_HQ_K_c15196/f2p0/1140	bHLH	TF
i1_HQ_K_c1736/f4p1/1567	bHLH	TF
i1_HQ_K_c17600/f2p7/1995	bHLH	TF
i1_HQ_K_c24031/f3p1/1706	bHLH	TF
i1_HQ_K_c24429/f2p15/1196	bHLH	TF
i1_HQ_K_c32225/f8p0/1854	bHLH	TF
i1_HQ_K_c33719/f4p1/1440	bHLH	TF
i1_HQ_K_c36647/f2p3/1301	bHLH	TF
i1_HQ_K_c37412/f2p7/1594	bHLH	TF
i1_HQ_K_c40071/f2p0/1747	bHLH	TF
i1_HQ_K_c40906/f2p3/1574	bHLH	TF
i1_HQ_K_c42848/f2p0/1581	bHLH	TF
i1_HQ_K_c4741/f2p7/1564	bHLH	TF
i1_HQ_K_c53756/f2p0/1541	bHLH	TF
i1_HQ_K_c57872/f3p0/1658	bHLH	TF
i1_HQ_K_c67451/f13p0/1799	bHLH	TF
i1_HQ_K_c69610/f2p0/1898	bHLH	TF
i1_HQ_K_c7223/f2p5/1437	bHLH	TF
i1_HQ_K_c8003/f3p0/1198	bHLH	TF
i1_HQ_K_c81465/f3p0/1070	bHLH	TF
i1_HQ_K_c8342/f5p3/1767	bHLH	TF
i2_HQ_K_c11856/f7p3/2239	bHLH	TF
i2_HQ_K_c1194/f5p0/2262	bHLH	TF
i2_HQ_K_c12979/f2p0/2436	bHLH	TF
i2_HQ_K_c12995/f6p4/2289	bHLH	TF
i2_HQ_K_c13686/f2p0/2749	bHLH	TF
i2_HQ_K_c147384/f3p0/2264	bHLH	TF
i2_HQ_K_c149761/f2p2/2854	bHLH	TF
i2_HQ_K_c170256/f10p2/2435	bHLH	TF
i2_HQ_K_c170283/f5p3/2478	bHLH	TF
i2_HQ_K_c170678/f2p2/2397	bHLH	TF
i2_HQ_K_c171216/f5p3/2189	bHLH	TF
i2_HQ_K_c171647/f9p0/2460	bHLH	TF
i2_HQ_K_c18647/f2p4/2160	bHLH	TF
i2_HQ_K_c1897/f3p1/2663	bHLH	TF
i2_HQ_K_c19728/f8p3/2200	bHLH	TF
i2_HQ_K_c20693/f2p0/2423	bHLH	TF
i2_HQ_K_c22069/f2p3/2280	bHLH	TF
i2_HQ_K_c22550/f2p2/2415	bHLH	TF
i2_HQ_K_c2283/f5p1/2767	bHLH	TF
i2_HQ_K_c23355/f2p1/2298	bHLH	TF
i2_HQ_K_c26308/f3p1/2351	bHLH	TF
i2_HQ_K_c28928/f3p1/2520	bHLH	TF
i2_HQ_K_c29133/f4p2/2167	bHLH	TF
i2_HQ_K_c35319/f31p0/2540	bHLH	TF
i2_HQ_K_c37520/f2p1/2287	bHLH	TF
i2_HQ_K_c38202/f3p0/2593	bHLH	TF
i2_HQ_K_c5101/f2p0/2362	bHLH	TF
i2_HQ_K_c53754/f24p3/2278	bHLH	TF
i2_HQ_K_c56593/f2p0/2476	bHLH	TF
i2_HQ_K_c59058/f2p0/2255	bHLH	TF
i2_HQ_K_c6033/f3p0/2560	bHLH	TF
i2_HQ_K_c60417/f3p0/2667	bHLH	TF
i2_HQ_K_c62867/f2p4/2128	bHLH	TF
i2_HQ_K_c67281/f2p1/2206	bHLH	TF
i2_HQ_K_c69372/f2p2/2050	bHLH	TF
i2_HQ_K_c74653/f10p3/2198	bHLH	TF
i2_HQ_K_c74915/f14p3/2364	bHLH	TF
i2_HQ_K_c85479/f2p2/2565	bHLH	TF
i2_HQ_K_c97348/f3p1/2592	bHLH	TF
i0_LQ_K_c12308/f1p0/823	bHLH	TF
i0_LQ_K_c13852/f1p3/909	bHLH	TF
i0_LQ_K_c24233/f1p0/826	bHLH	TF
i0_LQ_K_c29057/f1p2/944	bHLH	TF
i0_LQ_K_c2908/f1p7/978	bHLH	TF
i0_LQ_K_c3415/f1p1/717	bHLH	TF
i0_LQ_K_c3610/f1p10/875	bHLH	TF
i0_LQ_K_c5136/f1p25/952	bHLH	TF
i0_LQ_K_c7644/f1p0/682	bHLH	TF
i0_LQ_K_c8261/f1p0/675	bHLH	TF
i2_HQ_K_c124613/f3p1/2719	bHLH	TF
i3_HQ_K_c1993/f2p1/3276	bHLH	TF
i3_HQ_K_c6305/f2p3/3465	bHLH	TF
i4_HQ_K_c53754/f15p2/4466	bHLH	TF
i4_HQ_K_c53853/f5p1/4488	bHLH	TF
i4_HQ_K_c5898/f3p2/4479	bHLH	TF
i4_HQ_K_c8960/f4p0/4462	bHLH	TF
i1_LQ_K_c10053/f1p0/1518	bHLH	TF
i1_LQ_K_c10432/f1p1/1261	bHLH	TF
i1_LQ_K_c10628/f1p1/1451	bHLH	TF
i1_LQ_K_c11612/f1p2/1276	bHLH	TF
i1_LQ_K_c12430/f1p3/1431	bHLH	TF
i1_LQ_K_c13585/f1p0/1783	bHLH	TF
i1_LQ_K_c13897/f1p0/1435	bHLH	TF
i1_LQ_K_c13996/f1p2/1773	bHLH	TF
i1_LQ_K_c14250/f1p0/1288	bHLH	TF
i1_LQ_K_c14567/f1p2/1723	bHLH	TF
i1_LQ_K_c18715/f1p0/1869	bHLH	TF
i1_LQ_K_c18723/f1p0/1722	bHLH	TF
i1_LQ_K_c19643/f1p0/1765	bHLH	TF
i1_LQ_K_c19747/f1p0/1650	bHLH	TF
i1_LQ_K_c19759/f1p1/1518	bHLH	TF
i1_LQ_K_c20425/f1p0/1894	bHLH	TF
i1_LQ_K_c21241/f1p2/1979	bHLH	TF
i1_LQ_K_c21499/f1p0/1317	bHLH	TF
i1_LQ_K_c21556/f1p0/1685	bHLH	TF
i1_LQ_K_c22122/f1p2/1877	bHLH	TF
i1_LQ_K_c22307/f1p11/1148	bHLH	TF
i1_LQ_K_c22351/f1p1/1318	bHLH	TF
i1_LQ_K_c23366/f1p0/1168	bHLH	TF
i1_LQ_K_c23555/f1p20/1121	bHLH	TF
i1_LQ_K_c24044/f1p1/1662	bHLH	TF
i1_LQ_K_c24160/f1p7/1887	bHLH	TF
i1_LQ_K_c24387/f1p3/1455	bHLH	TF
i1_LQ_K_c25514/f1p2/1172	bHLH	TF
i1_LQ_K_c27871/f1p3/1309	bHLH	TF
i1_LQ_K_c28501/f1p3/1796	bHLH	TF
i1_LQ_K_c30286/f1p0/1079	bHLH	TF
i1_LQ_K_c34261/f1p0/1372	bHLH	TF
i1_LQ_K_c34480/f1p0/1814	bHLH	TF
i1_LQ_K_c34970/f1p0/1232	bHLH	TF
i1_LQ_K_c36387/f1p2/1651	bHLH	TF
i1_LQ_K_c3652/f1p0/1365	bHLH	TF
i1_LQ_K_c38000/f1p0/1744	bHLH	TF
i1_LQ_K_c38589/f1p3/1966	bHLH	TF
i1_LQ_K_c39026/f1p8/1649	bHLH	TF
i1_LQ_K_c39793/f1p4/1558	bHLH	TF
i1_LQ_K_c39879/f1p3/1915	bHLH	TF
i1_LQ_K_c40133/f1p0/1914	bHLH	TF
i1_LQ_K_c40730/f1p1/1491	bHLH	TF
i1_LQ_K_c41786/f1p0/1534	bHLH	TF
i1_LQ_K_c42728/f1p0/1739	bHLH	TF
i1_LQ_K_c42771/f1p0/1180	bHLH	TF
i1_LQ_K_c43113/f1p0/1498	bHLH	TF
i1_LQ_K_c43203/f1p5/1174	bHLH	TF
i1_LQ_K_c44070/f1p2/1547	bHLH	TF
i1_LQ_K_c4477/f1p0/1359	bHLH	TF
i1_LQ_K_c4805/f1p3/1604	bHLH	TF
i1_LQ_K_c4836/f1p0/1595	bHLH	TF
i1_LQ_K_c51879/f1p2/1794	bHLH	TF
i1_LQ_K_c53913/f1p0/1877	bHLH	TF
i1_LQ_K_c54488/f1p0/1745	bHLH	TF
i1_LQ_K_c5464/f1p11/1337	bHLH	TF
i1_LQ_K_c5522/f1p3/1960	bHLH	TF
i1_LQ_K_c55889/f1p0/1251	bHLH	TF
i1_LQ_K_c6363/f1p1/1541	bHLH	TF
i1_LQ_K_c6406/f1p0/1533	bHLH	TF
i1_LQ_K_c6939/f1p0/1227	bHLH	TF
i1_LQ_K_c8279/f1p45/1853	bHLH	TF
i1_LQ_K_c8467/f1p1/1970	bHLH	TF
i1_LQ_K_c9513/f1p0/1423	bHLH	TF
i1_LQ_K_c9589/f1p20/1918	bHLH	TF
i1_LQ_K_c53742/f1p3/1934	bHLH	TF
i1_LQ_K_c55387/f1p1/1936	bHLH	TF
i1_LQ_K_c55415/f1p0/1483	bHLH	TF
i1_LQ_K_c56818/f1p1/1391	bHLH	TF
i1_LQ_K_c56990/f1p0/1723	bHLH	TF
i1_LQ_K_c57787/f1p0/1276	bHLH	TF
i1_LQ_K_c58125/f1p3/1892	bHLH	TF
i1_LQ_K_c60170/f1p1/1959	bHLH	TF
i1_LQ_K_c60401/f1p0/1819	bHLH	TF
i1_LQ_K_c60726/f1p1/1502	bHLH	TF
i1_LQ_K_c60841/f1p0/1792	bHLH	TF
i1_LQ_K_c70220/f1p1/1199	bHLH	TF
i1_LQ_K_c70527/f1p0/1732	bHLH	TF
i1_LQ_K_c70772/f1p2/1553	bHLH	TF
i1_LQ_K_c70955/f1p0/1882	bHLH	TF
i1_LQ_K_c71267/f1p3/1355	bHLH	TF
i1_LQ_K_c72443/f1p0/1220	bHLH	TF
i1_LQ_K_c74074/f1p1/1927	bHLH	TF
i1_LQ_K_c74085/f1p1/1593	bHLH	TF
i1_LQ_K_c76767/f1p0/1971	bHLH	TF
i1_LQ_K_c77062/f1p0/1345	bHLH	TF
i1_LQ_K_c77103/f1p0/1137	bHLH	TF
i1_LQ_K_c77249/f1p0/1957	bHLH	TF
i1_LQ_K_c78508/f1p0/1506	bHLH	TF
i1_LQ_K_c79751/f1p1/1173	bHLH	TF
i1_LQ_K_c83750/f1p0/1109	bHLH	TF
i1_LQ_K_c96290/f1p0/1009	bHLH	TF
i2_LQ_K_c10016/f1p4/2206	bHLH	TF
i2_LQ_K_c10916/f1p0/2645	bHLH	TF
i2_LQ_K_c11142/f1p1/2730	bHLH	TF
i2_LQ_K_c12500/f1p1/2318	bHLH	TF
i2_LQ_K_c13071/f1p0/2190	bHLH	TF
i2_LQ_K_c13248/f1p0/2102	bHLH	TF
i2_LQ_K_c133633/f1p1/3060	bHLH	TF
i2_LQ_K_c134571/f1p0/2757	bHLH	TF
i2_LQ_K_c135716/f1p2/2098	bHLH	TF
i2_LQ_K_c13696/f1p3/2651	bHLH	TF
i2_LQ_K_c14394/f1p1/2754	bHLH	TF
i2_LQ_K_c15369/f1p0/2380	bHLH	TF
i2_LQ_K_c15451/f1p0/2201	bHLH	TF
i2_LQ_K_c157542/f1p1/2602	bHLH	TF
i2_LQ_K_c18903/f1p1/2300	bHLH	TF
i2_LQ_K_c19420/f1p4/3021	bHLH	TF
i2_LQ_K_c1966/f4p3/2438	bHLH	TF
i2_LQ_K_c19884/f1p3/2211	bHLH	TF
i2_LQ_K_c22160/f1p48/2526	bHLH	TF
i2_LQ_K_c24234/f1p18/2774	bHLH	TF
i2_LQ_K_c24806/f1p2/2768	bHLH	TF
i2_LQ_K_c31062/f1p2/2203	bHLH	TF
i2_LQ_K_c3141/f1p0/2233	bHLH	TF
i2_LQ_K_c3902/f1p1/2519	bHLH	TF
i2_LQ_K_c4467/f1p0/2746	bHLH	TF
i2_LQ_K_c4965/f1p0/2295	bHLH	TF
i2_LQ_K_c6429/f1p2/2427	bHLH	TF
i2_LQ_K_c9089/f1p1/2777	bHLH	TF
i2_LQ_K_c111251/f1p0/2217	bHLH	TF
i2_LQ_K_c135857/f1p7/2679	bHLH	TF
i2_LQ_K_c156302/f1p2/2187	bHLH	TF
i2_LQ_K_c157140/f1p1/2658	bHLH	TF
i2_LQ_K_c159467/f1p0/2663	bHLH	TF
i2_LQ_K_c165923/f1p0/2076	bHLH	TF
i2_LQ_K_c16714/f1p0/2080	bHLH	TF
i2_LQ_K_c169834/f1p1/2052	bHLH	TF
i2_LQ_K_c176952/f1p2/2620	bHLH	TF
i2_LQ_K_c185192/f1p2/2011	bHLH	TF
i2_LQ_K_c186068/f1p0/2037	bHLH	TF
i2_LQ_K_c186080/f1p0/2004	bHLH	TF
i2_LQ_K_c20933/f1p4/1808	bHLH	TF
i2_LQ_K_c23247/f1p3/2254	bHLH	TF
i2_LQ_K_c23586/f1p1/2339	bHLH	TF
i2_LQ_K_c26083/f1p0/2501	bHLH	TF
i2_LQ_K_c26098/f1p0/2618	bHLH	TF
i2_LQ_K_c26978/f1p2/2761	bHLH	TF
i2_LQ_K_c28010/f1p0/2124	bHLH	TF
i2_LQ_K_c28736/f1p0/2247	bHLH	TF
i2_LQ_K_c28841/f1p1/2244	bHLH	TF
i2_LQ_K_c30459/f1p4/2292	bHLH	TF
i2_LQ_K_c32044/f1p0/2086	bHLH	TF
i2_LQ_K_c36681/f1p1/2829	bHLH	TF
i2_LQ_K_c36882/f1p1/2679	bHLH	TF
i2_LQ_K_c37727/f1p0/2787	bHLH	TF
i2_LQ_K_c37800/f1p2/2629	bHLH	TF
i2_LQ_K_c38086/f1p0/2239	bHLH	TF
i2_LQ_K_c38544/f1p0/2944	bHLH	TF
i2_LQ_K_c39875/f1p0/2444	bHLH	TF
i2_LQ_K_c42486/f1p1/2424	bHLH	TF
i2_LQ_K_c42839/f1p5/2416	bHLH	TF
i2_LQ_K_c43989/f1p1/2600	bHLH	TF
i2_LQ_K_c44151/f1p1/2716	bHLH	TF
i2_LQ_K_c44243/f1p13/2351	bHLH	TF
i2_LQ_K_c46804/f1p0/2183	bHLH	TF
i2_LQ_K_c47375/f1p0/2478	bHLH	TF
i2_LQ_K_c55870/f1p2/2115	bHLH	TF
i2_LQ_K_c56331/f1p0/2262	bHLH	TF
i2_LQ_K_c56605/f1p0/2324	bHLH	TF
i2_LQ_K_c56765/f1p1/2313	bHLH	TF
i2_LQ_K_c58046/f1p0/2083	bHLH	TF
i2_LQ_K_c62022/f1p0/2572	bHLH	TF
i2_LQ_K_c62746/f1p0/2659	bHLH	TF
i2_LQ_K_c64286/f1p0/2376	bHLH	TF
i2_LQ_K_c65326/f1p2/2268	bHLH	TF
i2_LQ_K_c100407/f2p1/2451	bHLH	TF
i2_LQ_K_c100812/f1p3/2360	bHLH	TF
i2_LQ_K_c101333/f1p1/2750	bHLH	TF
i2_LQ_K_c101428/f1p2/3014	bHLH	TF
i2_LQ_K_c101430/f1p0/2792	bHLH	TF
i2_LQ_K_c102244/f1p2/2743	bHLH	TF
i2_LQ_K_c102413/f1p0/2570	bHLH	TF
i2_LQ_K_c102482/f1p1/2865	bHLH	TF
i2_LQ_K_c102724/f1p2/2853	bHLH	TF
i2_LQ_K_c105065/f1p1/2342	bHLH	TF
i2_LQ_K_c106775/f1p1/2844	bHLH	TF
i2_LQ_K_c107782/f1p1/2358	bHLH	TF
i2_LQ_K_c107819/f1p0/2135	bHLH	TF
i2_LQ_K_c109377/f1p8/3624	bHLH	TF
i2_LQ_K_c109718/f1p2/2422	bHLH	TF
i2_LQ_K_c110096/f1p3/2492	bHLH	TF
i2_LQ_K_c112151/f1p1/2576	bHLH	TF
i2_LQ_K_c112399/f1p0/2357	bHLH	TF
i2_LQ_K_c113093/f1p1/2412	bHLH	TF
i2_LQ_K_c120164/f1p1/2024	bHLH	TF
i2_LQ_K_c125583/f1p1/2373	bHLH	TF
i2_LQ_K_c125589/f1p2/2482	bHLH	TF
i2_LQ_K_c125753/f1p2/2358	bHLH	TF
i2_LQ_K_c126302/f1p47/2526	bHLH	TF
i2_LQ_K_c126507/f1p1/2520	bHLH	TF
i2_LQ_K_c127775/f1p0/2655	bHLH	TF
i2_LQ_K_c127947/f1p1/2292	bHLH	TF
i2_LQ_K_c129067/f1p1/2631	bHLH	TF
i2_LQ_K_c129983/f1p0/2402	bHLH	TF
i2_LQ_K_c130525/f1p0/2300	bHLH	TF
i2_LQ_K_c135046/f1p5/2520	bHLH	TF
i2_LQ_K_c143985/f1p3/2055	bHLH	TF
i2_LQ_K_c16033/f1p0/2023	bHLH	TF
i2_LQ_K_c174335/f1p0/2068	bHLH	TF
i2_LQ_K_c24707/f1p0/2128	bHLH	TF
i2_LQ_K_c28254/f1p3/2569	bHLH	TF
i2_LQ_K_c32420/f1p0/2085	bHLH	TF
i2_LQ_K_c39209/f1p3/2145	bHLH	TF
i2_LQ_K_c39886/f1p2/2528	bHLH	TF
i2_LQ_K_c40937/f1p1/2576	bHLH	TF
i2_LQ_K_c46703/f1p2/2663	bHLH	TF
i2_LQ_K_c46803/f1p1/2508	bHLH	TF
i2_LQ_K_c47603/f1p1/2312	bHLH	TF
i2_LQ_K_c64375/f1p14/2103	bHLH	TF
i2_LQ_K_c78121/f1p2/2838	bHLH	TF
i2_LQ_K_c78407/f1p2/2459	bHLH	TF
i2_LQ_K_c81249/f1p0/2124	bHLH	TF
i2_LQ_K_c83066/f1p4/2125	bHLH	TF
i2_LQ_K_c83473/f1p0/2322	bHLH	TF
i2_LQ_K_c83987/f1p2/2463	bHLH	TF
i2_LQ_K_c84776/f1p1/2215	bHLH	TF
i2_LQ_K_c85566/f1p3/2074	bHLH	TF
i2_LQ_K_c85621/f1p0/2763	bHLH	TF
i2_LQ_K_c85799/f1p0/2145	bHLH	TF
i2_LQ_K_c85879/f1p1/2515	bHLH	TF
i2_LQ_K_c86370/f1p0/2814	bHLH	TF
i2_LQ_K_c87605/f1p1/2350	bHLH	TF
i2_LQ_K_c88025/f1p2/2955	bHLH	TF
i2_LQ_K_c89140/f1p0/2142	bHLH	TF
i2_LQ_K_c94593/f1p2/2024	bHLH	TF
i2_LQ_K_c97284/f1p1/2355	bHLH	TF
i3_LQ_K_c13550/f1p0/3921	bHLH	TF
i3_LQ_K_c13700/f1p0/3488	bHLH	TF
i3_LQ_K_c14330/f1p6/3257	bHLH	TF
i3_LQ_K_c15153/f1p3/3806	bHLH	TF
i3_LQ_K_c16433/f1p1/3029	bHLH	TF
i3_LQ_K_c21304/f1p0/3699	bHLH	TF
i3_LQ_K_c23243/f1p1/3592	bHLH	TF
i3_LQ_K_c23390/f1p1/3632	bHLH	TF
i3_LQ_K_c24979/f1p5/3085	bHLH	TF
i3_LQ_K_c26463/f1p7/3935	bHLH	TF
i3_LQ_K_c28681/f1p4/3366	bHLH	TF
i3_LQ_K_c31853/f1p0/3012	bHLH	TF
i3_LQ_K_c35456/f1p0/3580	bHLH	TF
i3_LQ_K_c36681/f1p1/3169	bHLH	TF
i3_LQ_K_c36785/f1p3/3929	bHLH	TF
i3_LQ_K_c3950/f1p2/3383	bHLH	TF
i3_LQ_K_c6405/f1p0/3897	bHLH	TF
i3_LQ_K_c7603/f1p0/3730	bHLH	TF
i3_LQ_K_c8311/f1p4/3106	bHLH	TF
i3_LQ_K_c9488/f1p0/3088	bHLH	TF
i3_LQ_K_c9490/f1p1/3366	bHLH	TF
i3_LQ_K_c9906/f1p2/3798	bHLH	TF
i3_LQ_K_c30550/f1p3/3712	bHLH	TF
i3_LQ_K_c32740/f1p0/3067	bHLH	TF
i3_LQ_K_c35654/f1p0/3393	bHLH	TF
i3_LQ_K_c39534/f1p1/3977	bHLH	TF
i3_LQ_K_c42192/f1p0/3015	bHLH	TF
i4_LQ_K_c10637/f1p1/4785	bHLH	TF
i4_LQ_K_c10982/f1p3/4793	bHLH	TF
i4_LQ_K_c11654/f1p0/4273	bHLH	TF
i4_LQ_K_c11925/f1p0/4436	bHLH	TF
i4_LQ_K_c12904/f1p0/4621	bHLH	TF
i4_LQ_K_c13297/f1p2/4620	bHLH	TF
i4_LQ_K_c14828/f1p0/4845	bHLH	TF
i4_LQ_K_c14915/f1p0/4455	bHLH	TF
i4_LQ_K_c15828/f1p0/4048	bHLH	TF
i4_LQ_K_c16273/f1p0/4065	bHLH	TF
i4_LQ_K_c19700/f1p3/4407	bHLH	TF
i4_LQ_K_c1980/f1p0/4142	bHLH	TF
i4_LQ_K_c20411/f1p4/4243	bHLH	TF
i4_LQ_K_c2975/f1p36/4300	bHLH	TF
i4_LQ_K_c6433/f1p2/4133	bHLH	TF
i4_LQ_K_c6789/f1p3/4397	bHLH	TF
i4_LQ_K_c22308/f1p4/4418	bHLH	TF
i4_LQ_K_c24838/f1p14/4348	bHLH	TF
i4_LQ_K_c25257/f1p6/4471	bHLH	TF
i4_LQ_K_c25606/f1p3/4589	bHLH	TF
i4_LQ_K_c26707/f1p0/4334	bHLH	TF
i4_LQ_K_c27414/f1p4/4800	bHLH	TF
i4_LQ_K_c27585/f1p1/4335	bHLH	TF
i4_LQ_K_c30554/f1p0/4684	bHLH	TF
i4_LQ_K_c31175/f1p0/4274	bHLH	TF
i4_LQ_K_c31759/f1p0/4163	bHLH	TF
i4_LQ_K_c31874/f1p0/4184	bHLH	TF
i4_LQ_K_c34234/f1p1/4052	bHLH	TF
i4_LQ_K_c38659/f1p2/4450	bHLH	TF
i4_LQ_K_c38984/f1p0/4392	bHLH	TF
i4_LQ_K_c42441/f1p0/4735	bHLH	TF
i4_LQ_K_c46517/f1p0/4455	bHLH	TF
i4_LQ_K_c47022/f1p2/4705	bHLH	TF
i4_LQ_K_c47585/f1p0/4548	bHLH	TF
i4_LQ_K_c47836/f1p0/4520	bHLH	TF
i4_LQ_K_c48099/f1p1/4735	bHLH	TF
i4_LQ_K_c49609/f1p1/4111	bHLH	TF
i4_LQ_K_c49715/f1p0/4363	bHLH	TF
i4_LQ_K_c51718/f1p0/4113	bHLH	TF
i4_LQ_K_c58232/f1p0/4452	bHLH	TF
i2_HQ_K_c20820/f2p0/2368	BSD	TF
i2_HQ_K_c36662/f2p0/2124	BSD	TF
i2_LQ_K_c6406/f1p0/2313	BSD	TF
i2_LQ_K_c160993/f1p0/2467	BSD	TF
i2_LQ_K_c58892/f1p0/2808	BSD	TF
i2_LQ_K_c70208/f1p0/2017	BSD	TF
i2_LQ_K_c83768/f1p0/2393	BSD	TF
i3_LQ_K_c28350/f1p1/3200	BSD	TF
i4_LQ_K_c48639/f1p0/4483	bZIP	TF
i4_LQ_K_c51185/f1p1/4058	bZIP	TF
i4_LQ_K_c57096/f1p2/4446	bZIP	TF
i4_LQ_K_c57271/f1p1/4535	bZIP	TF
i4_LQ_K_c60130/f1p3/4227	bZIP	TF
i4_LQ_K_c60373/f1p0/4846	bZIP	TF
i4_LQ_K_c61235/f1p5/4287	bZIP	TF
i4_LQ_K_c61896/f1p0/4622	bZIP	TF
i4_LQ_K_c62633/f1p0/4435	bZIP	TF
i4_LQ_K_c65415/f1p0/4101	bZIP	TF
i4_LQ_K_c65434/f1p0/4062	bZIP	TF
i4_LQ_K_c67306/f1p0/4118	bZIP	TF
i5_LQ_K_c11232/f1p0/5031	bZIP	TF
i5_LQ_K_c1537/f1p0/5069	bZIP	TF
i5_LQ_K_c1611/f1p0/5461	bZIP	TF
i5_LQ_K_c2397/f1p0/5657	bZIP	TF
i5_LQ_K_c3609/f1p15/5416	bZIP	TF
i5_LQ_K_c5059/f1p5/5373	bZIP	TF
i5_LQ_K_c5646/f1p16/5203	bZIP	TF
i5_LQ_K_c6768/f1p0/5730	bZIP	TF
i5_LQ_K_c8465/f1p0/5098	bZIP	TF
i5_LQ_K_c9496/f1p1/5219	bZIP	TF
i5_LQ_K_c9578/f1p1/5089	bZIP	TF
i6_LQ_K_c555/f1p0/6132	bZIP	TF
i6_LQ_K_c796/f1p0/6451	bZIP	TF
i1_HQ_K_c10561/f2p1/1513	bZIP	TF
i1_HQ_K_c11675/f2p0/1700	bZIP	TF
i1_HQ_K_c11969/f3p1/1218	bZIP	TF
i1_HQ_K_c12041/f8p7/1399	bZIP	TF
i1_HQ_K_c1241/f3p4/1948	bZIP	TF
i1_HQ_K_c14172/f3p4/1934	bZIP	TF
i1_HQ_K_c14647/f2p3/1423	bZIP	TF
i1_HQ_K_c18254/f2p0/1428	bZIP	TF
i1_HQ_K_c18916/f6p3/1677	bZIP	TF
i1_HQ_K_c2030/f7p3/1650	bZIP	TF
i1_HQ_K_c2080/f3p1/1432	bZIP	TF
i1_HQ_K_c20910/f2p7/1722	bZIP	TF
i1_HQ_K_c2096/f4p11/1339	bZIP	TF
i1_HQ_K_c2439/f4p5/1961	bZIP	TF
i1_HQ_K_c27637/f2p12/1832	bZIP	TF
i1_HQ_K_c2935/f2p4/1949	bZIP	TF
i1_HQ_K_c33880/f3p2/1302	bZIP	TF
i1_HQ_K_c4205/f2p14/1654	bZIP	TF
i1_HQ_K_c44326/f3p1/1445	bZIP	TF
i1_HQ_K_c57150/f3p0/1452	bZIP	TF
i1_HQ_K_c6013/f3p1/1702	bZIP	TF
i1_HQ_K_c6864/f5p2/1840	bZIP	TF
i1_HQ_K_c69674/f2p0/1352	bZIP	TF
i1_HQ_K_c87404/f3p1/1947	bZIP	TF
i1_HQ_K_c87611/f2p4/1800	bZIP	TF
i1_HQ_K_c88281/f2p0/1748	bZIP	TF
i1_HQ_K_c8974/f4p0/1709	bZIP	TF
i1_HQ_K_c9649/f3p1/1918	bZIP	TF
i2_HQ_K_c133488/f2p4/2161	bZIP	TF
i2_HQ_K_c14007/f3p2/2175	bZIP	TF
i2_HQ_K_c162153/f6p7/2062	bZIP	TF
i2_HQ_K_c162525/f4p8/2054	bZIP	TF
i2_HQ_K_c163087/f2p4/2142	bZIP	TF
i2_HQ_K_c171095/f3p2/2554	bZIP	TF
i2_HQ_K_c171174/f3p8/2087	bZIP	TF
i2_HQ_K_c21649/f7p3/2568	bZIP	TF
i2_HQ_K_c2211/f6p6/2507	bZIP	TF
i2_HQ_K_c24642/f3p3/2717	bZIP	TF
i2_HQ_K_c27787/f6p6/2383	bZIP	TF
i2_HQ_K_c29417/f5p5/2702	bZIP	TF
i2_HQ_K_c34611/f2p4/2000	bZIP	TF
i2_HQ_K_c39717/f2p2/2465	bZIP	TF
i2_HQ_K_c40372/f3p8/2087	bZIP	TF
i2_HQ_K_c44156/f2p7/2958	bZIP	TF
i2_HQ_K_c44318/f2p6/2386	bZIP	TF
i2_HQ_K_c829/f18p5/2674	bZIP	TF
i2_HQ_K_c83609/f2p5/2685	bZIP	TF
i0_LQ_K_c14390/f1p0/760	bZIP	TF
i0_LQ_K_c16333/f1p2/402	bZIP	TF
i0_LQ_K_c18502/f2p0/788	bZIP	TF
i0_LQ_K_c22461/f1p0/711	bZIP	TF
i0_LQ_K_c22678/f1p3/709	bZIP	TF
i0_LQ_K_c25974/f1p0/971	bZIP	TF
i0_LQ_K_c27216/f1p1/749	bZIP	TF
i0_LQ_K_c8404/f1p4/590	bZIP	TF
i1_LQ_K_c1593/f2p9/1771	bZIP	TF
i1_LQ_K_c3774/f1p1/1397	bZIP	TF
i2_HQ_K_c91555/f2p4/1983	bZIP	TF
i3_HQ_K_c14843/f2p3/3980	bZIP	TF
i3_HQ_K_c19121/f2p0/3719	bZIP	TF
i3_HQ_K_c29364/f2p2/3340	bZIP	TF
i3_HQ_K_c43769/f2p2/3058	bZIP	TF
i3_HQ_K_c5008/f3p0/3180	bZIP	TF
i3_HQ_K_c6095/f2p2/3274	bZIP	TF
i4_HQ_K_c13907/f3p1/4435	bZIP	TF
i4_HQ_K_c25244/f2p1/4656	bZIP	TF
i4_HQ_K_c30310/f2p0/4860	bZIP	TF
i4_HQ_K_c35583/f2p0/4124	bZIP	TF
i4_HQ_K_c65362/f2p1/4045	bZIP	TF
i4_HQ_K_c68898/f3p0/4184	bZIP	TF
i0_LQ_K_c29448/f1p0/953	bZIP	TF
i1_LQ_K_c10358/f1p5/1734	bZIP	TF
i1_LQ_K_c11555/f1p0/1233	bZIP	TF
i1_LQ_K_c12044/f1p2/1862	bZIP	TF
i1_LQ_K_c12391/f1p1/1664	bZIP	TF
i1_LQ_K_c12528/f1p1/1467	bZIP	TF
i1_LQ_K_c13509/f1p28/1674	bZIP	TF
i1_LQ_K_c13529/f1p35/1820	bZIP	TF
i1_LQ_K_c14459/f1p0/1928	bZIP	TF
i1_LQ_K_c15949/f1p0/1073	bZIP	TF
i1_LQ_K_c19556/f1p2/1942	bZIP	TF
i1_LQ_K_c20094/f1p48/1302	bZIP	TF
i1_LQ_K_c20498/f1p1/1647	bZIP	TF
i1_LQ_K_c20797/f1p5/1595	bZIP	TF
i1_LQ_K_c20818/f1p0/1227	bZIP	TF
i1_LQ_K_c20841/f1p0/1198	bZIP	TF
i1_LQ_K_c23360/f2p1/1599	bZIP	TF
i1_LQ_K_c24085/f1p11/1672	bZIP	TF
i1_LQ_K_c24286/f2p1/1867	bZIP	TF
i1_LQ_K_c26556/f1p8/1768	bZIP	TF
i1_LQ_K_c26809/f1p1/1901	bZIP	TF
i1_LQ_K_c27175/f1p2/1365	bZIP	TF
i1_LQ_K_c27278/f1p2/1614	bZIP	TF
i1_LQ_K_c27526/f1p1/1707	bZIP	TF
i1_LQ_K_c27915/f1p7/1688	bZIP	TF
i1_LQ_K_c28340/f1p1/1591	bZIP	TF
i1_LQ_K_c28544/f1p0/1533	bZIP	TF
i1_LQ_K_c31512/f1p3/1033	bZIP	TF
i1_LQ_K_c34531/f1p3/1847	bZIP	TF
i1_LQ_K_c35174/f1p0/1997	bZIP	TF
i1_LQ_K_c35533/f1p0/1146	bZIP	TF
i1_LQ_K_c35628/f1p0/1838	bZIP	TF
i1_LQ_K_c35933/f1p3/2052	bZIP	TF
i1_LQ_K_c38291/f1p25/1713	bZIP	TF
i1_LQ_K_c38984/f1p1/1918	bZIP	TF
i1_LQ_K_c40037/f1p3/1197	bZIP	TF
i1_LQ_K_c41027/f1p3/1564	bZIP	TF
i1_LQ_K_c42365/f1p1/1596	bZIP	TF
i1_LQ_K_c43244/f1p15/1845	bZIP	TF
i1_LQ_K_c44099/f1p0/1324	bZIP	TF
i1_LQ_K_c44356/f1p4/1557	bZIP	TF
i1_LQ_K_c44373/f2p1/1720	bZIP	TF
i1_LQ_K_c44418/f1p3/1328	bZIP	TF
i1_LQ_K_c46880/f1p4/1072	bZIP	TF
i1_LQ_K_c51249/f2p1/1669	bZIP	TF
i1_LQ_K_c51689/f1p22/1848	bZIP	TF
i1_LQ_K_c54140/f1p0/1289	bZIP	TF
i1_LQ_K_c54189/f1p1/1631	bZIP	TF
i1_LQ_K_c55589/f1p0/1501	bZIP	TF
i1_LQ_K_c55810/f1p1/1704	bZIP	TF
i1_LQ_K_c57172/f1p2/1163	bZIP	TF
i1_LQ_K_c57213/f1p7/1836	bZIP	TF
i1_LQ_K_c57683/f1p10/1892	bZIP	TF
i1_LQ_K_c5852/f1p0/1471	bZIP	TF
i1_LQ_K_c6081/f1p0/1779	bZIP	TF
i1_LQ_K_c7045/f1p4/1478	bZIP	TF
i1_LQ_K_c7504/f1p12/1833	bZIP	TF
i1_LQ_K_c7882/f1p31/1898	bZIP	TF
i1_LQ_K_c7985/f1p0/1454	bZIP	TF
i1_LQ_K_c8188/f1p2/1917	bZIP	TF
i1_LQ_K_c9320/f1p2/1407	bZIP	TF
i1_LQ_K_c58345/f1p0/1425	bZIP	TF
i1_LQ_K_c58538/f1p0/1411	bZIP	TF
i1_LQ_K_c58976/f1p0/1357	bZIP	TF
i1_LQ_K_c59919/f1p4/1524	bZIP	TF
i1_LQ_K_c60154/f1p25/1943	bZIP	TF
i1_LQ_K_c61512/f1p1/1602	bZIP	TF
i1_LQ_K_c65167/f1p3/1635	bZIP	TF
i1_LQ_K_c72139/f1p2/1804	bZIP	TF
i1_LQ_K_c72163/f1p1/1640	bZIP	TF
i1_LQ_K_c73372/f1p2/1928	bZIP	TF
i1_LQ_K_c73901/f1p1/1944	bZIP	TF
i1_LQ_K_c75357/f1p1/1739	bZIP	TF
i1_LQ_K_c75752/f1p0/1837	bZIP	TF
i1_LQ_K_c76612/f1p0/1595	bZIP	TF
i1_LQ_K_c77358/f1p3/1872	bZIP	TF
i1_LQ_K_c77373/f1p0/1184	bZIP	TF
i1_LQ_K_c77572/f1p0/1831	bZIP	TF
i1_LQ_K_c78433/f1p0/1254	bZIP	TF
i1_LQ_K_c78451/f1p5/1666	bZIP	TF
i1_LQ_K_c78935/f1p3/1732	bZIP	TF
i1_LQ_K_c79129/f1p3/1946	bZIP	TF
i1_LQ_K_c82985/f1p1/1872	bZIP	TF
i1_LQ_K_c85066/f1p0/1049	bZIP	TF
i1_LQ_K_c88822/f1p0/1805	bZIP	TF
i1_LQ_K_c95804/f1p0/999	bZIP	TF
i2_LQ_K_c10790/f1p6/2319	bZIP	TF
i2_LQ_K_c11769/f1p7/2611	bZIP	TF
i2_LQ_K_c131670/f1p1/2236	bZIP	TF
i2_LQ_K_c132496/f1p4/2242	bZIP	TF
i2_LQ_K_c132894/f1p0/2482	bZIP	TF
i2_LQ_K_c134948/f1p0/2163	bZIP	TF
i2_LQ_K_c141070/f1p1/2031	bZIP	TF
i2_LQ_K_c141697/f1p3/1969	bZIP	TF
i2_LQ_K_c15284/f1p5/2909	bZIP	TF
i2_LQ_K_c16085/f1p4/2096	bZIP	TF
i2_LQ_K_c16592/f1p2/2420	bZIP	TF
i2_LQ_K_c19752/f1p4/2144	bZIP	TF
i2_LQ_K_c21514/f1p5/2472	bZIP	TF
i2_LQ_K_c2741/f1p5/2603	bZIP	TF
i2_LQ_K_c4141/f1p0/2549	bZIP	TF
i2_LQ_K_c6437/f1p2/2214	bZIP	TF
i2_LQ_K_c9684/f1p0/2201	bZIP	TF
i2_LQ_K_c146012/f1p8/2029	bZIP	TF
i2_LQ_K_c155323/f1p7/2530	bZIP	TF
i2_LQ_K_c156306/f1p2/2281	bZIP	TF
i2_LQ_K_c158561/f1p5/2519	bZIP	TF
i2_LQ_K_c183725/f1p3/1960	bZIP	TF
i2_LQ_K_c184003/f1p8/2781	bZIP	TF
i2_LQ_K_c184411/f1p0/2006	bZIP	TF
i2_LQ_K_c24132/f1p4/2731	bZIP	TF
i2_LQ_K_c24300/f1p4/2309	bZIP	TF
i2_LQ_K_c25932/f1p8/2082	bZIP	TF
i2_LQ_K_c27618/f1p4/2228	bZIP	TF
i2_LQ_K_c29122/f1p7/2622	bZIP	TF
i2_LQ_K_c34130/f1p1/2066	bZIP	TF
i2_LQ_K_c38588/f1p2/2285	bZIP	TF
i2_LQ_K_c39006/f1p5/2424	bZIP	TF
i2_LQ_K_c41761/f1p3/2106	bZIP	TF
i2_LQ_K_c44332/f1p1/2761	bZIP	TF
i2_LQ_K_c46484/f1p5/2283	bZIP	TF
i2_LQ_K_c47825/f1p1/2720	bZIP	TF
i2_LQ_K_c47856/f1p6/2892	bZIP	TF
i2_LQ_K_c55798/f1p2/2378	bZIP	TF
i2_LQ_K_c57704/f1p3/2363	bZIP	TF
i2_LQ_K_c58319/f1p8/2743	bZIP	TF
i2_LQ_K_c60626/f1p4/1986	bZIP	TF
i2_LQ_K_c60755/f1p1/2179	bZIP	TF
i2_LQ_K_c60991/f1p3/2117	bZIP	TF
i2_LQ_K_c62200/f1p6/2920	bZIP	TF
i2_LQ_K_c66935/f1p5/2412	bZIP	TF
i2_LQ_K_c67485/f1p4/2746	bZIP	TF
i2_LQ_K_c69339/f1p4/2177	bZIP	TF
i2_LQ_K_c102514/f1p8/2884	bZIP	TF
i2_LQ_K_c103263/f1p5/2485	bZIP	TF
i2_LQ_K_c104661/f1p0/2808	bZIP	TF
i2_LQ_K_c108766/f1p3/2130	bZIP	TF
i2_LQ_K_c115851/f1p4/2063	bZIP	TF
i2_LQ_K_c119326/f1p2/2059	bZIP	TF
i2_LQ_K_c119596/f1p5/2057	bZIP	TF
i2_LQ_K_c121234/f1p4/2047	bZIP	TF
i2_LQ_K_c129637/f1p5/2035	bZIP	TF
i2_LQ_K_c151985/f1p2/2507	bZIP	TF
i2_LQ_K_c16257/f1p2/2063	bZIP	TF
i2_LQ_K_c41783/f1p4/1991	bZIP	TF
i2_LQ_K_c77629/f1p2/2443	bZIP	TF
i2_LQ_K_c79480/f1p4/2279	bZIP	TF
i2_LQ_K_c80848/f1p6/2836	bZIP	TF
i2_LQ_K_c81312/f1p0/2114	bZIP	TF
i2_LQ_K_c81807/f1p5/2703	bZIP	TF
i2_LQ_K_c82046/f1p6/2153	bZIP	TF
i2_LQ_K_c83422/f1p12/2282	bZIP	TF
i2_LQ_K_c85330/f1p4/1975	bZIP	TF
i2_LQ_K_c86033/f1p5/2775	bZIP	TF
i2_LQ_K_c87540/f1p4/2120	bZIP	TF
i2_LQ_K_c89612/f1p6/2740	bZIP	TF
i2_LQ_K_c92864/f1p5/2055	bZIP	TF
i3_LQ_K_c2540/f1p1/3072	bZIP	TF
i3_LQ_K_c2559/f1p8/3161	bZIP	TF
i3_LQ_K_c10813/f1p0/3367	bZIP	TF
i3_LQ_K_c15772/f1p6/3040	bZIP	TF
i3_LQ_K_c15848/f1p0/3054	bZIP	TF
i3_LQ_K_c16686/f1p0/3019	bZIP	TF
i3_LQ_K_c19409/f1p5/3285	bZIP	TF
i3_LQ_K_c20359/f1p1/3664	bZIP	TF
i3_LQ_K_c20614/f1p0/3337	bZIP	TF
i3_LQ_K_c24648/f1p1/3164	bZIP	TF
i3_LQ_K_c2807/f1p3/3362	bZIP	TF
i3_LQ_K_c28089/f1p0/3867	bZIP	TF
i3_LQ_K_c29038/f1p1/3270	bZIP	TF
i3_LQ_K_c29557/f1p1/3920	bZIP	TF
i3_LQ_K_c35192/f1p0/3778	bZIP	TF
i3_LQ_K_c36710/f1p2/3865	bZIP	TF
i3_LQ_K_c7608/f1p1/3340	bZIP	TF
i3_LQ_K_c7778/f1p4/3074	bZIP	TF
i3_LQ_K_c33035/f1p0/3030	bZIP	TF
i3_LQ_K_c35910/f1p0/3973	bZIP	TF
i3_LQ_K_c35911/f1p49/3985	bZIP	TF
i3_LQ_K_c36238/f1p1/3099	bZIP	TF
i3_LQ_K_c38429/f1p5/3635	bZIP	TF
i3_LQ_K_c38996/f1p3/3194	bZIP	TF
i3_LQ_K_c42356/f1p13/3028	bZIP	TF
i3_LQ_K_c45266/f1p1/3164	bZIP	TF
i4_LQ_K_c10071/f1p118/4793	bZIP	TF
i4_LQ_K_c10074/f1p2/4148	bZIP	TF
i4_LQ_K_c11108/f1p1/4324	bZIP	TF
i4_LQ_K_c11723/f1p2/4562	bZIP	TF
i4_LQ_K_c13663/f1p0/4850	bZIP	TF
i4_LQ_K_c15054/f1p0/4236	bZIP	TF
i4_LQ_K_c20355/f1p0/4373	bZIP	TF
i4_LQ_K_c21226/f1p9/4203	bZIP	TF
i4_LQ_K_c22844/f1p1/4548	bZIP	TF
i4_LQ_K_c2619/f1p0/4325	bZIP	TF
i4_LQ_K_c2971/f1p0/4257	bZIP	TF
i4_LQ_K_c6804/f1p0/4499	bZIP	TF
i4_LQ_K_c8656/f1p0/4473	bZIP	TF
i4_LQ_K_c9791/f1p1/4916	bZIP	TF
i4_LQ_K_c24800/f1p0/4204	bZIP	TF
i4_LQ_K_c26039/f1p5/4256	bZIP	TF
i4_LQ_K_c26995/f1p0/4834	bZIP	TF
i4_LQ_K_c27245/f1p3/4976	bZIP	TF
i4_LQ_K_c27917/f1p1/4437	bZIP	TF
i4_LQ_K_c29493/f1p1/4809	bZIP	TF
i4_LQ_K_c29583/f1p2/4409	bZIP	TF
i4_LQ_K_c29884/f1p0/4246	bZIP	TF
i4_LQ_K_c30165/f1p3/4229	bZIP	TF
i4_LQ_K_c31109/f1p0/4849	bZIP	TF
i4_LQ_K_c33329/f1p2/4087	bZIP	TF
i4_LQ_K_c34222/f1p0/4031	bZIP	TF
i4_LQ_K_c38360/f1p0/4395	bZIP	TF
i4_LQ_K_c38739/f1p1/4348	bZIP	TF
i4_LQ_K_c39693/f1p5/4158	bZIP	TF
i4_LQ_K_c40092/f1p0/4212	bZIP	TF
i4_LQ_K_c41768/f1p1/4745	bZIP	TF
i4_LQ_K_c42000/f1p2/4271	bZIP	TF
i4_LQ_K_c42505/f1p1/4307	bZIP	TF
i4_LQ_K_c42587/f1p0/4792	bZIP	TF
i4_LQ_K_c42799/f1p0/4818	bZIP	TF
i4_LQ_K_c44781/f1p0/4499	bZIP	TF
i4_LQ_K_c45188/f1p22/4670	bZIP	TF
i4_LQ_K_c45690/f1p35/4511	bZIP	TF
i4_LQ_K_c45773/f1p0/4824	bZIP	TF
i4_LQ_K_c47074/f1p0/4163	bZIP	TF
i4_LQ_K_c47792/f1p0/4339	bZIP	TF
i4_LQ_K_c47964/f1p0/4634	bZIP	TF
i4_LQ_K_c52148/f1p0/4023	bZIP	TF
i4_LQ_K_c52585/f1p0/4084	bZIP	TF
i4_LQ_K_c56306/f1p3/4423	bZIP	TF
i4_LQ_K_c58311/f1p5/4610	bZIP	TF
i4_LQ_K_c58379/f1p4/4779	bZIP	TF
i1_HQ_K_c17862/f6p0/1422	C2C2-CO-like	TF
i1_HQ_K_c5253/f3p0/1259	C2C2-CO-like	TF
i1_HQ_K_c66935/f2p4/1386	C2C2-CO-like	TF
i1_HQ_K_c81418/f7p0/1339	C2C2-CO-like	TF
i2_HQ_K_c105437/f2p2/2100	C2C2-CO-like	TF
i2_HQ_K_c8305/f2p2/2250	C2C2-CO-like	TF
i2_HQ_K_c91573/f2p4/2036	C2C2-CO-like	TF
i1_LQ_K_c12124/f1p0/1225	C2C2-CO-like	TF
i1_LQ_K_c22262/f1p1/1539	C2C2-CO-like	TF
i1_LQ_K_c34872/f1p3/1966	C2C2-CO-like	TF
i1_LQ_K_c41878/f1p0/1393	C2C2-CO-like	TF
i1_LQ_K_c43465/f1p0/1769	C2C2-CO-like	TF
i1_LQ_K_c51373/f1p5/1356	C2C2-CO-like	TF
i1_LQ_K_c56974/f1p0/1409	C2C2-CO-like	TF
i1_LQ_K_c59249/f1p3/1447	C2C2-CO-like	TF
i1_LQ_K_c73586/f1p0/1620	C2C2-CO-like	TF
i1_LQ_K_c75202/f1p0/1425	C2C2-CO-like	TF
i2_LQ_K_c7479/f1p2/2966	C2C2-CO-like	TF
i2_LQ_K_c61565/f1p2/2166	C2C2-CO-like	TF
i2_LQ_K_c66887/f1p0/2823	C2C2-CO-like	TF
i2_LQ_K_c101367/f1p10/2466	C2C2-CO-like	TF
i2_LQ_K_c104181/f1p4/2135	C2C2-CO-like	TF
i2_LQ_K_c112927/f1p3/2363	C2C2-CO-like	TF
i2_LQ_K_c130766/f1p2/2221	C2C2-CO-like	TF
i2_LQ_K_c17125/f1p4/2049	C2C2-CO-like	TF
i2_LQ_K_c73724/f1p4/2075	C2C2-CO-like	TF
i2_LQ_K_c83223/f1p5/2115	C2C2-CO-like	TF
i2_LQ_K_c93221/f1p4/2049	C2C2-CO-like	TF
i2_LQ_K_c93523/f1p4/2089	C2C2-CO-like	TF
i3_LQ_K_c28807/f1p0/3390	C2C2-CO-like	TF
i3_LQ_K_c4498/f1p3/3176	C2C2-CO-like	TF
i4_LQ_K_c49412/f1p0/4591	C2C2-CO-like	TF
i5_LQ_K_c1963/f1p0/5861	C2C2-Dof	TF
i5_LQ_K_c4810/f1p0/5129	C2C2-Dof	TF
i5_LQ_K_c5393/f1p0/5628	C2C2-Dof	TF
i5_LQ_K_c6635/f1p2/5451	C2C2-Dof	TF
i5_LQ_K_c8202/f1p14/5135	C2C2-Dof	TF
i0_HQ_K_c12611/f2p2/650	C2C2-Dof	TF
i1_HQ_K_c17483/f3p0/1954	C2C2-Dof	TF
i1_HQ_K_c22856/f2p0/1945	C2C2-Dof	TF
i1_HQ_K_c45630/f2p0/1114	C2C2-Dof	TF
i1_HQ_K_c49008/f3p0/1044	C2C2-Dof	TF
i1_HQ_K_c87616/f12p1/1954	C2C2-Dof	TF
i2_HQ_K_c11630/f2p0/2421	C2C2-Dof	TF
i2_HQ_K_c147847/f6p2/2089	C2C2-Dof	TF
i2_HQ_K_c29248/f3p0/2202	C2C2-Dof	TF
i0_LQ_K_c19972/f1p2/944	C2C2-Dof	TF
i0_LQ_K_c7190/f1p0/868	C2C2-Dof	TF
i4_HQ_K_c20749/f2p3/4374	C2C2-Dof	TF
i1_LQ_K_c15448/f1p0/1126	C2C2-Dof	TF
i1_LQ_K_c16107/f1p0/1022	C2C2-Dof	TF
i1_LQ_K_c20968/f1p0/1635	C2C2-Dof	TF
i1_LQ_K_c24931/f1p0/1952	C2C2-Dof	TF
i1_LQ_K_c27792/f1p0/1378	C2C2-Dof	TF
i1_LQ_K_c28484/f1p2/1370	C2C2-Dof	TF
i1_LQ_K_c35183/f1p0/1387	C2C2-Dof	TF
i1_LQ_K_c3636/f1p0/1834	C2C2-Dof	TF
i1_LQ_K_c36575/f1p3/1539	C2C2-Dof	TF
i1_LQ_K_c36725/f1p5/1964	C2C2-Dof	TF
i1_LQ_K_c38691/f1p1/1185	C2C2-Dof	TF
i1_LQ_K_c39586/f1p1/1930	C2C2-Dof	TF
i1_LQ_K_c4159/f1p1/1197	C2C2-Dof	TF
i1_LQ_K_c43154/f1p0/1768	C2C2-Dof	TF
i1_LQ_K_c44441/f1p2/1332	C2C2-Dof	TF
i1_LQ_K_c47361/f1p0/1047	C2C2-Dof	TF
i1_LQ_K_c52264/f1p0/1312	C2C2-Dof	TF
i1_LQ_K_c54270/f1p0/1685	C2C2-Dof	TF
i1_LQ_K_c55685/f1p5/1125	C2C2-Dof	TF
i1_LQ_K_c7884/f1p0/1487	C2C2-Dof	TF
i1_LQ_K_c8340/f1p0/2022	C2C2-Dof	TF
i1_LQ_K_c8600/f1p0/1283	C2C2-Dof	TF
i1_LQ_K_c60337/f1p0/1961	C2C2-Dof	TF
i1_LQ_K_c64764/f1p6/1118	C2C2-Dof	TF
i1_LQ_K_c75335/f1p0/1476	C2C2-Dof	TF
i1_LQ_K_c75500/f1p0/1300	C2C2-Dof	TF
i1_LQ_K_c76288/f1p0/1718	C2C2-Dof	TF
i1_LQ_K_c76313/f1p1/1229	C2C2-Dof	TF
i1_LQ_K_c76790/f1p0/1739	C2C2-Dof	TF
i1_LQ_K_c78157/f1p0/1799	C2C2-Dof	TF
i1_LQ_K_c79086/f1p1/1162	C2C2-Dof	TF
i1_LQ_K_c86105/f1p4/1048	C2C2-Dof	TF
i2_LQ_K_c11514/f1p0/2208	C2C2-Dof	TF
[truncated: 7,102 more rows]

## Sheet: Table S5
Table S5 Co-expressed DEGs predicted to encode transcript factors.
143 Up-regulated TFs			42 Down-regulated TFs
TF_ID	TF Family		TF_ID	TF Family
i0_HQ_K_c5352/f2p0/969	AP2/ERF-ERF		i0_LQ_K_c11516/f1p1/867	AP2/ERF-ERF
i1_HQ_K_c22086/f2p0/1265	AP2/ERF-ERF		i1_LQ_K_c47669/f1p0/1016	AP2/ERF-ERF
i1_HQ_K_c51201/f2p0/1247	AP2/ERF-ERF		i3_HQ_K_c499/f14p0/3619	B3-ARF
i1_HQ_K_c68003/f14p0/1110	AP2/ERF-ERF		i3_LQ_K_c30573/f1p0/3656	B3-ARF
i1_HQ_K_c68060/f10p0/1148	AP2/ERF-ERF		i1_HQ_K_c40906/f2p3/1574	bHLH
i1_HQ_K_c81739/f2p0/1048	AP2/ERF-ERF		i1_HQ_K_c42848/f2p0/1581	bHLH
i1_HQ_K_c87531/f6p0/1200	AP2/ERF-ERF		i1_LQ_K_c6939/f1p0/1227	bHLH
i1_HQ_K_c88560/f4p0/1107	AP2/ERF-ERF		i1_LQ_K_c70955/f1p0/1882	bHLH
i1_HQ_K_c9739/f5p2/1404	AP2/ERF-ERF		i4_LQ_K_c34234/f1p1/4052	bHLH
i2_HQ_K_c10991/f2p3/2306	AP2/ERF-ERF		i2_LQ_K_c141070/f1p1/2031	bZIP
i1_LQ_K_c11548/f1p2/1867	AP2/ERF-ERF		i4_LQ_K_c52148/f1p0/4023	bZIP
i1_LQ_K_c27240/f1p0/1147	AP2/ERF-ERF		i1_LQ_K_c76790/f1p0/1739	C2C2-Dof
i1_LQ_K_c28020/f1p4/1147	AP2/ERF-ERF		i2_HQ_K_c77341/f2p2/3015	C3H
i1_LQ_K_c34518/f1p0/1516	AP2/ERF-ERF		i2_HQ_K_c85299/f3p3/2568	C3H
i1_LQ_K_c44287/f1p1/1166	AP2/ERF-ERF		i4_LQ_K_c21184/f1p0/4993	C3H
i1_LQ_K_c47980/f1p0/1105	AP2/ERF-ERF		i3_LQ_K_c38192/f1p4/3578	GARP-ARR-B
i1_LQ_K_c48139/f1p0/1034	AP2/ERF-ERF		i1_HQ_K_c57551/f2p0/1879	GRAS
i1_LQ_K_c53278/f1p0/1854	AP2/ERF-ERF		i1_HQ_K_c5772/f3p0/1657	GRAS
i1_LQ_K_c54442/f1p0/1150	AP2/ERF-ERF		i2_HQ_K_c46776/f8p2/2392	HB-BELL
i1_LQ_K_c56126/f1p0/1180	AP2/ERF-ERF		i2_LQ_K_c80612/f1p2/2295	HB-BELL
i2_LQ_K_c67107/f1p8/2500	AP2/ERF-ERF		i3_LQ_K_c32672/f1p0/3015	HB-other
i2_LQ_K_c95527/f1p0/2021	AP2/ERF-ERF		i1_LQ_K_c75770/f1p0/1668	HSF
i4_LQ_K_c34346/f1p0/4089	AP2/ERF-ERF		i3_LQ_K_c8507/f1p0/3505	HSF
i1_LQ_K_c13824/f1p0/1580	AP2/ERF-RAV		i6_LQ_K_c1440/f1p1/6809	MADS-M-type
i6_LQ_K_c1606/f1p0/6138	ARID		i1_HQ_K_c1568/f6p6/1284	MYB-related
i6_LQ_K_c767/f1p0/6539	ARID		i2_HQ_K_c5430/f4p5/2993	MYB-related
i6_HQ_K_c44/f2p0/6364	ARID		i3_HQ_K_c44152/f13p0/3039	MYB-related
i1_HQ_K_c12053/f3p1/1968	AUX/IAA		i3_HQ_K_c44722/f2p0/3141	MYB-related
i0_LQ_K_c9931/f1p48/949	AUX/IAA		i1_LQ_K_c77433/f1p1/1447	MYB-related
i3_HQ_K_c6288/f2p6/3510	AUX/IAA		i1_LQ_K_c52730/f1p0/1685	NAC
i1_LQ_K_c13864/f1p0/1997	AUX/IAA		i4_LQ_K_c63454/f1p2/4984	NF-YA
i1_LQ_K_c24346/f1p0/1621	AUX/IAA		i2_HQ_K_c3991/f3p4/2221	NF-YA
i1_LQ_K_c80139/f1p6/1213	AUX/IAA		i1_LQ_K_c27575/f1p2/1896	NF-YA
i2_LQ_K_c45050/f1p0/2288	AUX/IAA		i2_LQ_K_c57082/f1p4/2786	NF-YA
i1_HQ_K_c10024/f2p0/1654	B3		i2_LQ_K_c112317/f1p5/2330	NF-YA
i1_HQ_K_c866/f4p0/1587	B3		i4_LQ_K_c41379/f1p0/4256	NF-YA
i1_HQ_K_c22876/f2p12/1442	BES1		i2_HQ_K_c1522/f10p4/2451	Pseudo ARR-B
i4_LQ_K_c19982/f1p5/4409	BES1		i4_LQ_K_c65161/f2p0/4159	RWP-RK
i1_HQ_K_c1736/f4p1/1567	bHLH		i3_LQ_K_c13572/f1p4/3484	RWP-RK
i1_LQ_K_c70220/f1p1/1199	bHLH		i5_LQ_K_c2839/f1p0/5099	SNF2
i2_LQ_K_c186068/f1p0/2037	bHLH		i1_HQ_K_c9229/f2p2/1759	Tify
i2_LQ_K_c56331/f1p0/2262	bHLH		i1_LQ_K_c25881/f1p0/1161	Tify
i4_LQ_K_c47022/f1p2/4705	bHLH
i1_HQ_K_c12041/f8p7/1399	bZIP
i0_LQ_K_c14390/f1p0/760	bZIP
i0_LQ_K_c22678/f1p3/709	bZIP
i1_LQ_K_c35533/f1p0/1146	bZIP
i1_LQ_K_c95804/f1p0/999	bZIP
i1_HQ_K_c2243/f9p2/1372	C3H
i1_HQ_K_c87713/f80p1/1447	C3H
i1_LQ_K_c12056/f2p2/1321	C3H
i1_LQ_K_c4982/f5p2/1394	C3H
i1_LQ_K_c44176/f1p1/1837	GARP-G2-like
i1_LQ_K_c56019/f1p1/1367	GARP-G2-like
i1_LQ_K_c72402/f1p5/1417	GARP-G2-like
i3_LQ_K_c27413/f1p10/3357	GARP-G2-like
i3_LQ_K_c42896/f1p0/3022	GARP-G2-like
i2_HQ_K_c172391/f11p1/2389	GRAS
i4_HQ_K_c5839/f2p1/4493	GRAS
i1_HQ_K_c87044/f2p5/1144	HB-HD-ZIP
i1_HQ_K_c57781/f2p0/1202	HSF
i1_HQ_K_c59952/f2p0/1161	HSF
i1_HQ_K_c86938/f3p15/1166	HSF
i1_LQ_K_c53749/f1p1/1591	HSF
i2_LQ_K_c42932/f1p0/2750	HSF
i6_LQ_K_c840/f1p0/6338	IWS1
i2_HQ_K_c1420/f3p5/2759	IWS1
i2_LQ_K_c104020/f1p2/2365	IWS1
i2_LQ_K_c108878/f1p4/2330	IWS1
i5_LQ_K_c2303/f1p1/5888	Jumonji
i5_LQ_K_c9832/f1p1/5409	Jumonji
i4_HQ_K_c29027/f2p3/4733	Jumonji
i3_LQ_K_c8059/f1p1/3718	Jumonji
i3_LQ_K_c3260/f1p0/3947	Jumonji
i4_LQ_K_c46689/f1p22/4401	Jumonji
i4_LQ_K_c49525/f1p0/4616	Jumonji
i0_HQ_K_c737/f10p0/990	LOB
i0_HQ_K_c8375/f4p0/744	LOB
i1_HQ_K_c81618/f3p2/1065	LOB
i2_HQ_K_c147406/f9p9/2032	LOB
i2_HQ_K_c78678/f2p8/2568	LOB
i0_LQ_K_c20996/f1p0/989	LOB
i0_LQ_K_c3027/f1p0/827	LOB
i1_LQ_K_c18343/f2p0/1514	LOB
i1_LQ_K_c27343/f1p0/1146	LOB
i1_LQ_K_c55503/f1p9/1807	LOB
i1_LQ_K_c9392/f1p2/1186	LOB
i1_LQ_K_c74169/f1p0/1293	LOB
i1_LQ_K_c76053/f1p1/1347	LOB
i1_LQ_K_c82019/f2p0/1026	LOB
i1_LQ_K_c84263/f1p0/1039	LOB
i2_LQ_K_c22073/f1p4/2111	LOB
i1_LQ_K_c79194/f1p1/1152	MADS-MIKC
i1_HQ_K_c20402/f2p0/1282	MYB
i1_LQ_K_c25855/f1p0/1141	MYB
i1_LQ_K_c28280/f1p0/1250	MYB
i1_LQ_K_c31064/f1p0/1070	MYB
i1_LQ_K_c4916/f1p0/2028	MYB
i1_LQ_K_c57867/f1p1/1910	MYB
i3_LQ_K_c38719/f1p0/3676	MYB
i1_HQ_K_c1871/f7p3/1238	MYB-related
i1_HQ_K_c24216/f2p0/1915	MYB-related
i0_LQ_K_c26233/f1p1/833	MYB-related
i1_LQ_K_c65652/f1p6/1061	MYB-related
i2_LQ_K_c137520/f1p1/2296	MYB-related
i1_LQ_K_c76808/f1p1/1460	NAC
i3_HQ_K_c18429/f3p0/3425	Others
i3_HQ_K_c6632/f2p1/3599	Others
i1_LQ_K_c74300/f1p2/1179	Others
i3_LQ_K_c22540/f1p2/3949	Others
i3_LQ_K_c43890/f1p1/3185	Others
i4_LQ_K_c8956/f1p1/4532	Others
i3_LQ_K_c11254/f1p4/3538	PHD
i3_LQ_K_c20635/f1p0/3626	PHD
i4_LQ_K_c31651/f1p0/4553	RWP-RK
i1_LQ_K_c51966/f1p0/1958	SET
i2_LQ_K_c130017/f1p3/2205	SET
i2_HQ_K_c104088/f2p2/2441	TAZ
i1_LQ_K_c36109/f1p2/1379	Tify
i1_HQ_K_c88489/f18p6/1644	Trihelix
i2_HQ_K_c162327/f3p8/2020	Trihelix
i2_HQ_K_c170457/f41p2/2387	Trihelix
i2_HQ_K_c172661/f245p15/2470	Trihelix
i2_HQ_K_c17297/f27p2/2435	Trihelix
i2_HQ_K_c17470/f17p7/2146	Trihelix
i2_HQ_K_c121694/f3p0/2676	Trihelix
i1_LQ_K_c26054/f1p6/2141	Trihelix
i1_LQ_K_c35284/f1p4/1760	Trihelix
i1_LQ_K_c35953/f1p4/2130	Trihelix
i2_LQ_K_c138090/f1p13/2380	Trihelix
i2_LQ_K_c155085/f1p17/2564	Trihelix
i2_LQ_K_c26463/f1p11/2927	Trihelix
i2_LQ_K_c82159/f1p6/2230	Trihelix
i6_LQ_K_c843/f1p0/6419	WRKY
i1_HQ_K_c18234/f4p0/1398	WRKY
i1_HQ_K_c20409/f2p0/1379	WRKY
i0_LQ_K_c2144/f2p9/666	WRKY
i1_LQ_K_c72235/f1p3/1180	WRKY
i1_LQ_K_c87991/f1p1/1589	WRKY
i2_LQ_K_c134399/f1p3/3055	WRKY
i2_LQ_K_c29898/f1p0/2201	WRKY
i2_LQ_K_c124585/f2p1/2631	WRKY
i2_LQ_K_c125240/f1p3/2088	WRKY

## Sheet: Table S6
Table S6 Members of the d group from upregulated co-expressed TFs.
Gene_id	TF family	Number
i1_LQ_K_c47980/f1p0/1105	AP2/ERF-ERF	8
i1_HQ_K_c88560/f4p0/1107
i1_HQ_K_c68060/f10p0/1148
i1_HQ_K_c81739/f2p0/1048
i1_HQ_K_c68003/f14p0/1110
i1_HQ_K_c87531/f6p0/1200
i1_LQ_K_c48139/f1p0/1034
i0_HQ_K_c5352/f2p0/969
i1_LQ_K_c13824/f1p0/1580	AP2/ERF-RAV	1
i1_LQ_K_c80139/f1p6/1213	AUX/IAA	1
i1_HQ_K_c1736/f4p1/1567	bHLH	1
i1_HQ_K_c12041/f8p7/1399	bZIP	1
i1_HQ_K_c87713/f80p1/1447	C3H	2
i1_HQ_K_c2243/f9p2/1372
i1_HQ_K_c87044/f2p5/1144	HB-HD-ZIP	1
i1_HQ_K_c81618/f3p2/1065	LOB	10
i0_LQ_K_c3027/f1p0/827
i1_LQ_K_c74169/f1p0/1293
i2_HQ_K_c147406/f9p9/2032
i0_LQ_K_c20996/f1p0/989
i1_LQ_K_c18343/f2p0/1514
i1_LQ_K_c84263/f1p0/1039
i0_HQ_K_c8375/f4p0/744
i0_HQ_K_c737/f10p0/990
i1_LQ_K_c82019/f2p0/1026
i1_HQ_K_c1871/f7p3/1238	MYB-related	1
i2_HQ_K_c17297/f27p2/2435	Trihelix	5
i1_LQ_K_c35284/f1p4/1760
i2_HQ_K_c170457/f41p2/2387
i2_HQ_K_c172661/f245p15/2470
i1_HQ_K_c88489/f18p6/1644
