# Supplementary material for: Full-Length Transcriptome and RNA-Seq Analyses Reveal the Mechanisms Underlying Waterlogging Tolerance in Kiwifruit (Actinidia valvata)
Source: Int J Mol Sci. 2022 Mar 17;23(6):3237. doi: 10.3390/ijms23063237 (PMC8951935; doi:10.3390/ijms23063237)
Supplement: Supplementary file 1 [file ijms-23-03237-s001.zip › Additional file 10.xls]

## Sheet: Table S7
Table S7 Genes enriched in the seven modules obtained by WGCNA.
Modules	Number	ID	NR
Red	63	i2_LQ_K_c24159/f1p2/2330	Xan_ur_permease domain-containing protein [Cephalotus follicularis]
		i1_HQ_K_c32109/f22p1/1844	PREDICTED: thylakoidal processing peptidase 1, chloroplastic [Vitis vinifera]
		i0_HQ_K_c33440/f17p0/870	putative ADP-ribosylation factor A1F protein 2, partial [Taraxacum kok-saghyz]
		i1_LQ_K_c81578/f3p2/1065	Leucine-rich repeat-containing protein [Cynara cardunculus var. scolymus]
		i1_HQ_K_c2150/f14p1/1442	PREDICTED: la-related protein 6A [Capsicum annuum]
		i1_HQ_K_c16862/f12p1/1203	ubiquitin conjugating enzyme J2 [Camellia oleifera]
		i1_HQ_K_c49463/f16p4/1844	U-box domain-containing protein 9 [Morus notabilis]
		i1_HQ_K_c45402/f2p1/1103	PREDICTED: protein HEAT-STRESS-ASSOCIATED 32 [Nelumbo nucifera]
		i1_HQ_K_c88666/f5p1/1825	PREDICTED: catalase isozyme 1 [Gossypium arboreum]
		i0_LQ_K_c33312/f6p0/931	RecName: Full=Histone H2B
		i1_LQ_K_c40304/f1p5/1742	enolase [Camellia sinensis]
		i0_LQ_K_c23907/f1p0/998	PREDICTED: 14-3-3 protein 7 [Gossypium raimondii]
		i1_LQ_K_c7996/f1p0/1170	ubiquitin-conjugating enzyme [Medicago truncatula]
		i1_HQ_K_c17115/f13p0/1641	PREDICTED: dnaJ protein homolog [Theobroma cacao]
		i1_HQ_K_c33662/f2p0/1627	PREDICTED: dnaJ protein homolog [Theobroma cacao]
		i1_HQ_K_c8701/f2p1/1668	PREDICTED: polyadenylate-binding protein RBP47 [Nicotiana tomentosiformis]
		i1_LQ_K_c41539/f1p0/1460	PREDICTED: dnaJ protein homolog [Theobroma cacao]
		i0_HQ_K_c33279/f12p0/791	PREDICTED: glycine-rich RNA-binding protein 2-like [Sesamum indicum]
		i1_HQ_K_c823/f16p2/1325	PREDICTED: diaminopimelate epimerase, chloroplastic [Vitis vinifera]
		i1_LQ_K_c75787/f1p0/1914	PREDICTED: dnaJ protein homolog [Ipomoea nil]
		i0_LQ_K_c23740/f1p0/964	ubiquitin-conjugating enzyme [Medicago truncatula]
		i1_HQ_K_c1326/f15p3/1586	PREDICTED: dnaJ protein homolog [Theobroma cacao]
		i2_HQ_K_c97919/f20p6/2087	RecName: Full=Polyadenylate-binding protein RBP47; Short=Poly(A)-binding protein RBP47; AltName: Full=RNA-binding protein 47; Short=NplRBP47
		i1_HQ_K_c59833/f2p3/1739	ethylene response factor 5 [Actinidia deliciosa]
		i0_HQ_K_c1449/f14p2/820	GA signaling F-Box [Actinidia deliciosa]
		i1_LQ_K_c96571/f1p2/1005	PREDICTED: proactivator polypeptide-like 1 [Theobroma cacao]
		i1_HQ_K_c87171/f3p5/1690	PREDICTED: dnaJ protein homolog [Theobroma cacao]
		i1_HQ_K_c2348/f7p0/1286	PREDICTED: quinone oxidoreductase PIG3 [Populus euphratica]
		i1_LQ_K_c25366/f1p6/1285	PREDICTED: protein BPS1, chloroplastic-like [Vitis vinifera]
		i2_HQ_K_c138922/f5p12/2055	PREDICTED: oxalate--CoA ligase [Vitis vinifera]
		i0_LQ_K_c11877/f1p4/976	PREDICTED: clathrin light chain 2 [Theobroma cacao]
		i1_HQ_K_c694/f11p1/1413	Carbon-nitrogen hydrolase [Corchorus capsularis]
		i1_HQ_K_c12387/f2p1/1351	PREDICTED: syntaxin-132 [Vitis vinifera]
		i1_LQ_K_c89754/f1p2/1510	ethylene response factor 5 [Actinidia deliciosa]
		i1_LQ_K_c16545/f1p3/1018	putative glycine-rich RNA binding protein-like [Solanum tuberosum]
		i0_HQ_K_c1494/f5p15/795	PREDICTED: histidine-containing phosphotransfer protein 1 [Theobroma cacao]
		i1_HQ_K_c11687/f2p0/1441	PREDICTED: thiosulfate/3-mercaptopyruvate sulfurtransferase 1, mitochondrial isoform X1 [Jatropha curcas]
		i2_HQ_K_c53648/f4p5/2762	PREDICTED: cell division cycle protein 48 homolog [Sesamum indicum]
		i0_HQ_K_c528/f11p0/848	Cu_bind_like domain-containing protein [Cephalotus follicularis]
		i2_LQ_K_c27587/f1p5/2174	PREDICTED: polyadenylate-binding protein RBP47 [Sesamum indicum]
		i1_LQ_K_c87733/f1p4/1341	PREDICTED: putative casein kinase II subunit beta-4 isoform X1 [Citrus sinensis]
		i1_HQ_K_c87156/f25p4/1762	PREDICTED: shaggy-related protein kinase eta [Nicotiana attenuata]
		i2_LQ_K_c12467/f1p5/2254	RecName: Full=Polyadenylate-binding protein RBP47; Short=Poly(A)-binding protein RBP47; AltName: Full=RNA-binding protein 47; Short=NplRBP47
		i0_HQ_K_c1787/f4p0/1001	PREDICTED: protein DEHYDRATION-INDUCED 19 homolog 4 [Jatropha curcas]
		i1_HQ_K_c2012/f4p1/1673	PREDICTED: tubulin beta chain [Ricinus communis]
		i1_HQ_K_c88014/f47p1/1182	PREDICTED: hypersensitive-induced response protein 2 [Populus euphratica]
		i1_LQ_K_c3004/f1p1/1239	PREDICTED: hypersensitive-induced response protein 2 [Populus euphratica]
		i0_HQ_K_c1956/f2p0/883	PREDICTED: zinc finger A20 and AN1 domain-containing stress-associated protein 5 [Cucumis melo]
		i1_HQ_K_c2096/f4p11/1339	bZIP transcription factor 18 [Camellia sinensis]
		i1_HQ_K_c13911/f3p5/1252	aluminum-induced protein [Codonopsis lanceolata]
		i0_HQ_K_c33219/f12p0/985	PREDICTED: ferredoxin-3, chloroplastic [Vitis vinifera]
		i0_HQ_K_c33213/f19p0/759	bet v 1 related allergen [Actinidia chinensis]
		i0_HQ_K_c34193/f2p0/634	late embryogenesis abundant protein 3L-1 [Camellia sinensis]
		i1_LQ_K_c53557/f1p2/1653	RecName: Full=Polyadenylate-binding protein RBP47; Short=Poly(A)-binding protein RBP47; AltName: Full=RNA-binding protein 47; Short=NplRBP47
		i1_LQ_K_c79490/f1p0/1962	RecName: Full=Polyadenylate-binding protein RBP47; Short=Poly(A)-binding protein RBP47; AltName: Full=RNA-binding protein 47; Short=NplRBP47
		i1_LQ_K_c13093/f5p5/1648	eIF4-gamma/eIF5/eIF2-epsilon domain-containing family protein [Populus trichocarpa]
		i1_LQ_K_c96356/f1p1/1020	PREDICTED: GTP-binding protein SAR1A [Cucumis melo]
		i1_LQ_K_c66412/f1p5/828	late embryogenesis abundant protein 3L-1 [Camellia sinensis]
		i1_HQ_K_c1804/f7p5/1620	PREDICTED: ferredoxin--NADP reductase, root isozyme, chloroplastic isoform X2 [Vigna angularis]
		i2_LQ_K_c23558/f1p5/2272	PREDICTED: polyadenylate-binding protein RBP47 [Sesamum indicum]
		i1_LQ_K_c40604/f1p0/1712	PREDICTED: dnaJ protein homolog [Theobroma cacao]
		i1_HQ_K_c67711/f15p4/1874	PREDICTED: probable serine protease EDA2 isoform X1 [Vitis vinifera]
		i1_HQ_K_c86752/f8p8/1708	PREDICTED: auxin-responsive protein IAA9 [Theobroma cacao]
Turquoise	1070	i0_HQ_K_c16595/f18p21/962	PREDICTED: ADP-ribosylation factor 2 isoform X1 [Nicotiana tomentosiformis]
		i0_HQ_K_c29986/f3p0/332	Heavy metal-associated domain, HMA [Cynara cardunculus var. scolymus]
		i0_HQ_K_c1979/f6p0/639	dsDNA_bind domain-containing protein [Cephalotus follicularis]
		i1_HQ_K_c32019/f29p3/1584	GDP-D-mannose pyrophosphorylase [Actinidia latifolia]
		i0_LQ_K_c33250/f12p0/589	PREDICTED: 60S ribosomal protein L34 [Ziziphus jujuba]
		i0_HQ_K_c34067/f19p0/350	PREDICTED: ubiquitin-like protein 5 [Nicotiana attenuata]
		i0_LQ_K_c19933/f1p6/658	autophagy-related protein 8C [Dorcoceras hygrometricum]
		i0_LQ_K_c19308/f1p6/707	PREDICTED: cysteine proteinase inhibitor A-like [Nicotiana sylvestris]
		i0_HQ_K_c4366/f2p0/620	PREDICTED: peptidyl-prolyl cis-trans isomerase Pin1-like [Gossypium arboreum]
		i0_HQ_K_c724/f5p0/899	chalcone isomerase [Camellia nitidissima]
		i0_LQ_K_c9015/f1p0/670	PREDICTED: cytochrome c oxidase subunit 6a, mitochondrial [Arachis ipaensis]
		i0_HQ_K_c33537/f8p0/810	Ubiquitin-conjugating enzyme, active site-containing protein [Cynara cardunculus var. scolymus]
		i0_LQ_K_c11524/f1p1/552	PREDICTED: 40S ribosomal protein S28-1 [Cucumis sativus]
		i0_LQ_K_c6377/f1p0/658	PREDICTED: RING-box protein 1a [Citrus sinensis]
		i0_HQ_K_c12292/f2p0/548	PREDICTED: eukaryotic translation initiation factor 5A-2 [Ipomoea nil]
		i0_LQ_K_c27259/f1p0/618	PREDICTED: abscisic stress-ripening protein 2 [Nicotiana tabacum]
		i0_HQ_K_c30030/f2p0/406	PREDICTED: cytochrome b-c1 complex subunit 9-like [Prunus mume]
		i0_HQ_K_c34353/f44p1/769	PREDICTED: SKP1-like protein 1B [Theobroma cacao]
		i0_HQ_K_c2368/f3p0/834	Mms zwei [Theobroma cacao]
		i1_LQ_K_c96644/f1p1/1001	PREDICTED: ubiquitin-conjugating enzyme E2 7 [Tarenaya hassleriana]
		i0_HQ_K_c33267/f2p0/511	PREDICTED: cytochrome b-c1 complex subunit 8 [Elaeis guineensis]
		i0_LQ_K_c7738/f1p2/903	RecName: Full=Kirola; AltName: Allergen=Act d 11
		i0_HQ_K_c33493/f8p0/755	Histone domain-containing protein, partial [Cephalotus follicularis]
		i0_LQ_K_c29264/f1p0/683	PREDICTED: multiprotein-bridging factor 1b [Juglans regia]
		i0_LQ_K_c13285/f1p3/706	PREDICTED: profilin [Capsicum annuum]
		i0_HQ_K_c8405/f2p0/902	PREDICTED: probable glutathione S-transferase [Eucalyptus grandis]
		i1_LQ_K_c46634/f1p1/1052	PREDICTED: UPF0664 stress-induced protein C29B12.11c [Vitis vinifera]
		i1_LQ_K_c83762/f1p0/1067	pathogenesis-related protein 1 [Actinidia eriantha]
		i2_LQ_K_c104955/f1p3/2202	#N/A
		i1_HQ_K_c88143/f51p6/1326	patatin-like protein 3 precursor [Nicotiana tabacum]
		i1_HQ_K_c11627/f2p6/1797	PREDICTED: shaggy-related protein kinase alpha [Vitis vinifera]
		i0_LQ_K_c20521/f1p0/708	PREDICTED: glycine-rich RNA-binding protein [Daucus carota subsp. sativus]
		i1_HQ_K_c88060/f15p2/1240	uricase [Lotus japonicus]
		i1_LQ_K_c54140/f1p0/1289	PREDICTED: bZIP transcription factor 11-like [Nelumbo nucifera]
		i1_LQ_K_c76129/f1p2/1179	PREDICTED: stem-specific protein TSJT1 [Ziziphus jujuba]
		i2_HQ_K_c172658/f132p11/2296	PREDICTED: heat shock cognate 70 kDa protein 2 [Gossypium arboreum]
		i0_LQ_K_c19475/f1p0/934	PREDICTED: 14 kDa proline-rich protein DC2.15-like [Erythranthe guttata]
		i1_HQ_K_c49356/f7p0/1957	PREDICTED: elongation factor 1-alpha-like isoform X2 [Musa acuminata subsp. malaccensis]
		i1_HQ_K_c67486/f4p6/1883	PREDICTED: aspartic proteinase oryzasin-1-like [Ipomoea nil]
		i0_HQ_K_c8888/f5p8/830	PREDICTED: lactoylglutathione lyase-like [Nicotiana sylvestris]
		i1_LQ_K_c66530/f1p4/1074	PREDICTED: protein YLS9-like [Juglans regia]
		i0_LQ_K_c25672/f1p0/877	PREDICTED: ADP-ribosylation factor-like protein 5 [Jatropha curcas]
		i2_LQ_K_c109818/f1p24/2387	#N/A
		i1_HQ_K_c88941/f86p2/1503	GDP-D-mannose 3',5'-epimerase [Actinidia deliciosa]
		i0_HQ_K_c9162/f2p0/529	conserved hypothetical protein [Ricinus communis]
		i2_LQ_K_c155365/f1p12/2964	PREDICTED: heat shock cognate 70 kDa protein 2 [Ricinus communis]
		i0_LQ_K_c18502/f2p0/788	PREDICTED: ocs element-binding factor 1-like [Sesamum indicum]
		i1_LQ_K_c95804/f1p0/999	PREDICTED: bZIP transcription factor 11-like [Nelumbo nucifera]
		i1_LQ_K_c84559/f1p2/1049	uricase [Lotus japonicus]
		i1_HQ_K_c40654/f4p48/1258	PREDICTED: RPM1-interacting protein 4 [Vitis vinifera]
		i1_LQ_K_c23671/f1p14/1893	PREDICTED: aspartic proteinase oryzasin-1-like [Ipomoea nil]
		i3_LQ_K_c34681/f1p0/3488	#N/A
		i2_HQ_K_c170631/f16p3/2048	PREDICTED: T-complex protein 1 subunit epsilon [Sesamum indicum]
		i1_HQ_K_c82005/f2p3/1072	PREDICTED: probable tyrosine-protein phosphatase At1g05000 [Vitis vinifera]
		i2_LQ_K_c7028/f1p0/2254	RecName: Full=3-hydroxy-3-methylglutaryl-coenzyme A reductase; Short=HMG-CoA reductase
		i1_HQ_K_c32393/f16p2/1286	PREDICTED: peroxisome biogenesis protein 22-like isoform X1 [Malus domestica]
		i1_LQ_K_c71003/f1p0/1650	1-hydroxy-2-methyl-butenyl 4-diphosphate reductase [Actinidia deliciosa]
		i4_LQ_K_c22850/f1p7/4351	#N/A
		i2_HQ_K_c29457/f2p11/2259	PREDICTED: heat shock cognate 70 kDa protein 2-like [Nicotiana tabacum]
		i1_LQ_K_c3060/f1p2/1311	xyloglucan endotransglucosylase/hydrolase 14 [Actinidia deliciosa]
		i1_HQ_K_c1568/f6p6/1284	Myb domain protein 48 isoform 1 [Theobroma cacao]
		i0_LQ_K_c7619/f1p0/974	PREDICTED: RING-H2 finger protein ATL2-like [Nicotiana attenuata]
		i0_LQ_K_c14390/f1p0/760	PREDICTED: ocs element-binding factor 1-like [Sesamum indicum]
		i1_HQ_K_c1506/f4p0/1367	PREDICTED: bark storage protein A [Vitis vinifera]
		i2_LQ_K_c32432/f1p1/2043	#N/A
		i1_HQ_K_c22188/f2p4/1830	PREDICTED: lysine histidine transporter-like 8 [Theobroma cacao]
		i1_HQ_K_c28263/f2p2/1591	PREDICTED: peroxidase 73-like [Gossypium raimondii]
		i1_LQ_K_c5135/f1p0/1385	PREDICTED: 1-aminocyclopropane-1-carboxylate oxidase 1-like isoform X1 [Juglans regia]
		i1_LQ_K_c94193/f1p2/1746	PREDICTED: tubulin alpha-3 chain isoform X1 [Brassica oleracea var. oleracea]
		i1_HQ_K_c48742/f18p2/1915	PREDICTED: plant intracellular Ras-group-related LRR protein 5-like [Gossypium raimondii]
		i1_HQ_K_c87452/f2p2/1181	uricase [Lotus japonicus]
		i2_HQ_K_c17297/f27p2/2435	PREDICTED: stress response protein NST1 [Jatropha curcas]
		i2_HQ_K_c172555/f116p6/2094	beta-amylase [Actinidia arguta]
		i1_LQ_K_c70867/f1p0/1553	PREDICTED: ERBB-3 BINDING PROTEIN 1 [Cucumis melo]
		i1_HQ_K_c81917/f2p2/1055	PREDICTED: ATP synthase subunit O, mitochondrial-like [Sesamum indicum]
		i1_HQ_K_c8033/f2p2/1313	PREDICTED: probable prolyl 4-hydroxylase 10 [Vitis vinifera]
		i1_LQ_K_c8129/f1p0/1850	PREDICTED: beta-amyrin 28-oxidase-like [Sesamum indicum]
		i3_LQ_K_c41796/f1p3/3029	#N/A
		i1_HQ_K_c1120/f7p0/1556	PREDICTED: SNAP25 homologous protein SNAP33 [Nicotiana tabacum]
		i1_LQ_K_c86993/f12p1/1297	ethylene response factor 11 [Actinidia deliciosa]
		i1_HQ_K_c24225/f2p1/1341	gibberellin 2 oxidase 1 [Camellia lipoensis]
		i1_HQ_K_c86833/f6p22/1287	putative chitodextrinase [Eucommia ulmoides]
		i0_LQ_K_c26185/f1p4/803	bet v 1 related allergen [Actinidia deliciosa]
		i0_HQ_K_c33661/f24p0/880	putative ADP-ribosylation factor A1F protein 2, partial [Taraxacum kok-saghyz]
		i0_LQ_K_c35274/f1p0/706	PREDICTED: auxin-repressed 12.5 kDa protein isoform X3 [Theobroma cacao]
		i1_LQ_K_c21058/f1p4/1936	PREDICTED: elongation factor 1-alpha [Juglans regia]
		i1_LQ_K_c84931/f1p22/1031	bet v 1 related allergen [Actinidia deliciosa]
		i0_HQ_K_c17672/f4p0/526	Ubiquitin-like family protein [Populus trichocarpa]
		i0_LQ_K_c23772/f1p0/692	PREDICTED: auxin-repressed 12.5 kDa protein isoform X3 [Theobroma cacao]
		i0_LQ_K_c25353/f1p0/845	PREDICTED: ubiquitin-conjugating enzyme E2 10-like, partial [Phoenix dactylifera]
		i0_HQ_K_c1096/f2p0/869	PREDICTED: ubiquitin-conjugating enzyme E2 variant 1C [Cucumis melo]
		i0_LQ_K_c19965/f1p0/877	bet v 1 related allergen [Actinidia deliciosa]
		i1_HQ_K_c31991/f37p2/1559	actinidin Act2d [Actinidia eriantha]
		i1_LQ_K_c85313/f1p6/1026	Cu_bind_like domain-containing protein [Cephalotus follicularis]
		i1_HQ_K_c19416/f2p4/1489	GDP-D-mannose pyrophosphorylase [Actinidia latifolia]
		i0_LQ_K_c6727/f1p3/439	Heme peroxidase, plant/fungal/bacterial [Corchorus olitorius]
		i1_LQ_K_c79053/f1p4/1541	PREDICTED: R3H domain-containing protein 2 [Vitis vinifera]
		i0_HQ_K_c2519/f9p0/887	PREDICTED: 1,2-dihydroxy-3-keto-5-methylthiopentene dioxygenase 2 [Daucus carota subsp. sativus]
		i0_HQ_K_c2213/f4p0/905	putative glycine-rich RNA binding protein-like [Solanum tuberosum]
		i0_LQ_K_c5895/f1p0/789	bet v 1 related allergen [Actinidia chinensis]
		i1_HQ_K_c81964/f2p1/1073	PREDICTED: putative late blight resistance protein homolog R1B-19 [Ricinus communis]
		i1_HQ_K_c44600/f17p1/1110	Zinc finger, AN1-type [Corchorus capsularis]
		i0_HQ_K_c33270/f5p6/530	Bifunctional inhibitor/plant lipid transfer protein/seed storage helical domain-containing protein [Cynara cardunculus var. scolymus]
		i0_LQ_K_c11576/f1p3/983	PREDICTED: zinc finger A20 and AN1 domain-containing stress-associated protein 8-like [Daucus carota subsp. sativus]
		i0_HQ_K_c34212/f34p2/458	BnaAnng32380D [Brassica napus]
		i1_LQ_K_c24806/f1p2/1765	PREDICTED: polyadenylate-binding protein RBP45 [Vitis vinifera]
		i1_LQ_K_c37591/f1p3/1901	PREDICTED: plasminogen activator inhibitor 1 RNA-binding protein [Theobroma cacao]
		i1_HQ_K_c67450/f52p4/1718	PREDICTED: shaggy-related protein kinase alpha [Vitis vinifera]
		i1_LQ_K_c40083/f1p0/1950	enolase [Camellia sinensis]
		i0_LQ_K_c5048/f1p2/899	PREDICTED: ras-related protein Rab11D [Vitis vinifera]
		i0_LQ_K_c26542/f1p6/691	PREDICTED: DNA-directed RNA polymerases I, II, and III subunit RPABC5 [Sesamum indicum]
		i0_HQ_K_c1041/f5p0/556	PREDICTED: NADH dehydrogenase [ubiquinone] 1 alpha subcomplex subunit 1 [Ricinus communis]
		i3_LQ_K_c19507/f1p1/3199	#N/A
		i0_LQ_K_c19501/f1p7/918	PREDICTED: RNA-binding protein 8A [Vitis vinifera]
		i1_LQ_K_c48209/f1p1/1049	PREDICTED: ubiquitin-conjugating enzyme E2 7-like [Daucus carota subsp. sativus]
		i3_LQ_K_c33402/f1p0/3173	#N/A
		i1_HQ_K_c87772/f2p0/1265	PREDICTED: serine/arginine-rich SC35-like splicing factor SCL30 [Vitis vinifera]
		i1_LQ_K_c71412/f1p2/1631	PREDICTED: 26S protease regulatory subunit S10B homolog B-like, partial [Populus euphratica]
		i1_LQ_K_c24604/f1p0/1797	PREDICTED: protein DJ-1 homolog B-like [Jatropha curcas]
		i1_HQ_K_c34202/f2p0/1888	enolase [Camellia sinensis]
		i0_LQ_K_c7761/f1p3/643	PREDICTED: NADH dehydrogenase [ubiquinone] 1 alpha subcomplex subunit 6 [Gossypium raimondii]
		i0_HQ_K_c1375/f6p0/847	PREDICTED: cyanate hydratase [Eucalyptus grandis]
		i0_HQ_K_c10621/f4p9/832	Cu_bind_like domain-containing protein [Cephalotus follicularis]
		i0_HQ_K_c10569/f2p1/941	PREDICTED: ADP-ribosylation factor 2 isoform X1 [Nicotiana tomentosiformis]
		i0_HQ_K_c1770/f2p0/847	PREDICTED: cysteine proteinase inhibitor [Juglans regia]
		i2_HQ_K_c7304/f3p0/2571	PREDICTED: phosphoenolpyruvate carboxykinase [ATP] [Nelumbo nucifera]
		i4_LQ_K_c39175/f1p0/4646	#N/A
		i0_HQ_K_c10445/f2p0/924	PREDICTED: peptide methionine sulfoxide reductase A1 [Vitis vinifera]
		i1_LQ_K_c87847/f2p4/1143	homodomain-leucine zipper protein ATHB-13-like protein [Vitis vinifera]
		i0_HQ_K_c33397/f7p2/774	glutathione peroxidase 2 [Panax ginseng]
		i0_HQ_K_c33811/f2p0/835	PREDICTED: umecyanin-like [Juglans regia]
		i1_HQ_K_c8146/f5p4/1687	PREDICTED: tubulin beta chain [Elaeis guineensis]
		i0_LQ_K_c31269/f1p0/892	BUD31/G10-related, conserved site-containing protein [Cynara cardunculus var. scolymus]
		i0_LQ_K_c28540/f1p0/892	PREDICTED: 40S ribosomal protein S8-like [Populus euphratica]
		i1_LQ_K_c86178/f1p0/1048	PREDICTED: histone deacetylase complex subunit SAP18 [Sesamum indicum]
		i0_LQ_K_c22042/f1p0/874	PREDICTED: late embryogenesis abundant protein At1g64065-like [Vitis vinifera]
		i1_HQ_K_c7003/f8p2/1280	PREDICTED: exosome complex component RRP42 [Ziziphus jujuba]
		i0_HQ_K_c2242/f4p7/904	PREDICTED: protein C2-DOMAIN ABA-RELATED 4 [Ricinus communis]
		i5_LQ_K_c7899/f1p0/5714	#N/A
		i1_HQ_K_c67620/f32p0/1785	PREDICTED: 26S proteasome regulatory subunit 4 homolog B-like [Juglans regia]
		i0_HQ_K_c588/f10p0/829	Cu_bind_like domain-containing protein [Cephalotus follicularis]
		i1_HQ_K_c1931/f2p1/1972	AAA+ ATPase domain-containing protein [Cynara cardunculus var. scolymus]
		i1_HQ_K_c2104/f3p4/1775	PREDICTED: eukaryotic initiation factor 4A-8 [Pyrus x bretschneideri]
		i5_LQ_K_c4840/f1p0/5589	#N/A
		i7_HQ_K_c107/f2p0/7188	PREDICTED: glutamate synthase 1 [NADH], chloroplastic isoform X1 [Vitis vinifera]
		i0_HQ_K_c1804/f4p4/759	Heavy metal transport/detoxification superfamily protein, putative [Theobroma cacao]
		i1_HQ_K_c33501/f6p1/1534	PREDICTED: CBL-interacting serine/threonine-protein kinase 7-like [Gossypium raimondii]
		i0_LQ_K_c27481/f1p12/759	ERF transcription factor 07 [Coffea arabica]
		i1_LQ_K_c328/f1p1/1631	eIF4-gamma/eIF5/eIF2-epsilon domain-containing family protein [Populus trichocarpa]
		i2_HQ_K_c139674/f2p1/2031	PREDICTED: ketol-acid reductoisomerase, chloroplastic [Juglans regia]
		i3_LQ_K_c6826/f1p2/3541	#N/A
		i1_HQ_K_c91120/f2p0/1349	PREDICTED: secretory carrier-associated membrane protein 3 [Citrus sinensis]
		i1_HQ_K_c11009/f4p1/1872	PREDICTED: nuclear/nucleolar GTPase 2 [Nelumbo nucifera]
		i2_HQ_K_c53948/f24p1/2090	PREDICTED: lysine--tRNA ligase, cytoplasmic isoform X2 [Vitis vinifera]
		i2_HQ_K_c100573/f8p6/2245	GA repressor DELLA [Actinidia deliciosa]
		i0_LQ_K_c9656/f1p16/970	ascorbate peroxidase [Camellia sinensis]
		i1_LQ_K_c87257/f1p0/1375	PREDICTED: hevein-like preproprotein [Citrus sinensis]
		i1_HQ_K_c80487/f8p0/1109	PREDICTED: dihydroceramide fatty acyl 2-hydroxylase FAH1-like [Ipomoea nil]
		i2_HQ_K_c54153/f2p4/2216	PREDICTED: FRIGIDA-like protein 4a [Vitis vinifera]
		i0_LQ_K_c8402/f1p6/515	metallothionein-like protein MT1A [Salix matsudana]
		i1_HQ_K_c87858/f82p3/1436	chitinase [Vitis hybrid cultivar]
		i1_LQ_K_c66848/f1p1/1104	pathogenesis-related protein 1 [Actinidia eriantha]
		i1_LQ_K_c65369/f1p4/1034	PREDICTED: transport and Golgi organization 2 homolog [Juglans regia]
		i0_HQ_K_c1727/f6p0/728	acyl carrier protein [Camellia japonica]
		i1_HQ_K_c68081/f37p0/1573	Polyubiquitin-A [Glycine soja]
		i0_LQ_K_c13393/f1p7/949	glutathione S-transferase U45 [Populus yatungensis]
		i1_HQ_K_c1585/f6p6/1510	Os02g0161900, partial [Oryza sativa Japonica Group]
		i1_LQ_K_c9262/f1p0/1888	PREDICTED: 14-3-3-like protein A [Theobroma cacao]
		i1_HQ_K_c2496/f8p3/1411	ADP/ATP carrier 3 isoform 1 [Theobroma cacao]
		i0_LQ_K_c19273/f1p7/760	PREDICTED: HMG1/2-like protein [Nelumbo nucifera]
		i0_HQ_K_c33228/f14p0/747	PREDICTED: ubiquitin-conjugating enzyme E2 28-like [Nelumbo nucifera]
		i1_HQ_K_c807/f10p0/1181	PREDICTED: aldo-keto reductase family 4 member C9 [Gossypium raimondii]
		i1_HQ_K_c87737/f13p1/1298	PREDICTED: transcription factor MYB48-like isoform X1 [Juglans regia]
		i1_LQ_K_c88970/f1p4/1816	PREDICTED: protein disulfide-isomerase-like [Juglans regia]
		i2_HQ_K_c171585/f7p3/2024	RecName: Full=Carboxylesterase 1; Short=AeCXE1
		i1_LQ_K_c40132/f1p0/1513	PREDICTED: 14-3-3-like protein GF14 kappa [Daucus carota subsp. sativus]
		i1_LQ_K_c12034/f1p1/1216	PREDICTED: non-symbiotic hemoglobin 1 [Jatropha curcas]
		i1_HQ_K_c66898/f23p2/1625	PREDICTED: protein GPR107-like [Ipomoea nil]
		i1_HQ_K_c69519/f4p3/1334	PREDICTED: malate dehydrogenase, mitochondrial-like [Nelumbo nucifera]
		i1_HQ_K_c87146/f18p0/1494	UDP-glucosyl transferase 85A2 [Theobroma cacao]
		i1_LQ_K_c87467/f3p1/1151	PREDICTED: vacuolar protein sorting-associated protein 32 homolog 2-like [Pyrus x bretschneideri]
		i0_LQ_K_c19866/f1p0/468	Rad60-SLD domain-containing protein [Cephalotus follicularis]
		i1_HQ_K_c7665/f5p1/1562	PREDICTED: ADP,ATP carrier protein, mitochondrial-like [Ipomoea nil]
		i1_LQ_K_c1167/f16p1/1293	cinnamyl alcohol dehydrogenase 3 [Camellia sinensis]
		i0_LQ_K_c13378/f1p0/725	Heavy metal-associated domain, HMA [Cynara cardunculus var. scolymus]
		i1_HQ_K_c13267/f12p1/1824	PREDICTED: thylakoidal processing peptidase 1, chloroplastic [Vitis vinifera]
		i1_HQ_K_c67563/f2p2/1132	PREDICTED: 14-3-3-like protein GF14 kappa [Daucus carota subsp. sativus]
		i1_LQ_K_c22063/f1p3/1368	PREDICTED: mitochondrial dicarboxylate/tricarboxylate transporter DTC [Sesamum indicum]
		i2_HQ_K_c53127/f3p1/2977	PREDICTED: cytochrome P450 CYP72A219-like [Sesamum indicum]
		i0_LQ_K_c10310/f1p7/795	PREDICTED: protein SRC2 [Nelumbo nucifera]
		i3_LQ_K_c45931/f1p22/3020	#N/A
		i1_HQ_K_c18055/f3p0/1948	PREDICTED: ACT domain-containing protein ACR4 [Vitis vinifera]
		i2_HQ_K_c54805/f8p0/2268	glyceraldehyde-3-phosphate dehydrogenase C [Shorea beccariana]
		i1_HQ_K_c81556/f3p0/1107	RecName: Full=Carboxylesterase 1; Short=AeCXE1
		i2_HQ_K_c171380/f10p3/2106	PREDICTED: E3 ubiquitin protein ligase DRIP2 [Vitis vinifera]
		i0_LQ_K_c7674/f1p21/736	flowering-promoting factor 1-like protein 3-like protein [Corchorus olitorius]
		i1_LQ_K_c23530/f1p2/1646	SKP1-like protein 1A [Glycine soja]
		i1_HQ_K_c87347/f4p0/1162	vacuolar ATP synthase subunit [Camellia sinensis]
		i1_HQ_K_c62188/f5p0/1107	PREDICTED: 6,7-dimethyl-8-ribityllumazine synthase, chloroplastic [Ipomoea nil]
		i2_LQ_K_c72476/f1p1/2049	PREDICTED: ketol-acid reductoisomerase, chloroplastic [Juglans regia]
		i0_HQ_K_c33914/f16p0/826	PREDICTED: umecyanin-like [Juglans regia]
		i1_HQ_K_c87978/f11p3/1366	flavanone 3-hydroxylase [Actinidia chinensis]
		i1_HQ_K_c87582/f41p0/1573	PREDICTED: mitogen-activated protein kinase 3 [Gossypium arboreum]
		i1_HQ_K_c62634/f3p0/1120	coil domain protein [Panax ginseng]
		i0_HQ_K_c1982/f4p6/629	heavy metal transport/detoxification superfamily protein [Medicago truncatula]
		i0_HQ_K_c1699/f5p0/946	PREDICTED: zinc finger protein ZAT10-like [Nicotiana tomentosiformis]
		i0_LQ_K_c1871/f3p4/902	PREDICTED: histidine-containing phosphotransfer protein 1-like isoform X1 [Erythranthe guttata]
		i0_LQ_K_c2378/f3p0/925	PREDICTED: pro-hevein [Ricinus communis]
		i0_LQ_K_c27857/f1p15/920	PREDICTED: dehydrin ERD14 [Vitis vinifera]
		i0_HQ_K_c17646/f3p0/889	PREDICTED: dehydrin ERD14 [Vitis vinifera]
		i0_HQ_K_c16747/f11p4/790	PREDICTED: lachrymatory-factor synthase [Vitis vinifera]
		i2_LQ_K_c12054/f1p5/2730	PDC1 [Actinidia deliciosa]
		i1_HQ_K_c87714/f33p2/1742	actin [Nitraria sibirica]
		i0_HQ_K_c2086/f7p1/992	Usp domain-containing protein [Cephalotus follicularis]
		i4_LQ_K_c48555/f1p0/4584	#N/A
		i0_LQ_K_c28988/f1p0/524	PREDICTED: subtilisin-like protease SBT3.17 [Nelumbo nucifera]
		i0_HQ_K_c1105/f9p2/998	PREDICTED: zinc finger A20 and AN1 domain-containing stress-associated protein 8-like [Daucus carota subsp. sativus]
		i0_LQ_K_c9319/f1p0/881	ankyrin repeat family protein [Pelargonium incrassatum]
		i1_HQ_K_c87300/f14p0/1785	PREDICTED: thylakoidal processing peptidase 1, chloroplastic [Vitis vinifera]
		i1_HQ_K_c88554/f5p21/1028	PREDICTED: BI1-like protein [Nicotiana tomentosiformis]
		i1_LQ_K_c95309/f1p0/1010	PREDICTED: BI1-like protein [Juglans regia]
		i1_LQ_K_c80139/f1p6/1213	PREDICTED: auxin-responsive protein IAA1 [Jatropha curcas]
		i1_LQ_K_c54130/f1p0/1225	PREDICTED: 1-aminocyclopropane-1-carboxylate oxidase 5 [Citrus sinensis]
		i1_HQ_K_c14239/f8p5/1230	isopentenyl diphosphate isomerase [Actinidia arguta]
		i0_HQ_K_c6169/f3p0/469	PREDICTED: mitochondrial import receptor subunit TOM7-1-like [Fragaria vesca subsp. vesca]
		i0_LQ_K_c24359/f1p0/577	PREDICTED: organ-specific protein P4 [Vitis vinifera]
		i1_LQ_K_c28483/f1p0/1256	PNP_UDP_1 domain-containing protein [Cephalotus follicularis]
		i1_LQ_K_c96541/f1p0/1005	PREDICTED: soluble inorganic pyrophosphatase 1-like [Juglans regia]
		i0_LQ_K_c6607/f1p5/994	PREDICTED: vesicle-associated membrane protein 727 [Jatropha curcas]
		i0_HQ_K_c33320/f9p0/953	PREDICTED: E3 ubiquitin-protein ligase RMA1H1 [Populus euphratica]
		i1_HQ_K_c1054/f17p5/1779	PREDICTED: cytochrome P450 81E8-like [Jatropha curcas]
		i1_HQ_K_c45622/f2p1/1898	PREDICTED: serine/threonine-protein kinase SRK2A [Vitis vinifera]
		i1_HQ_K_c18453/f2p0/1618	fatty acid desaturase [Camellia chekiangoleosa]
		i0_LQ_K_c7578/f1p2/723	PREDICTED: RPM1-interacting protein 4 isoform X2 [Capsicum annuum]
		i1_HQ_K_c89522/f4p0/1053	PREDICTED: tetraspanin-8-like [Daucus carota subsp. sativus]
		i0_HQ_K_c2117/f2p0/913	PREDICTED: ORM1-like protein 2 [Malus domestica]
		i0_LQ_K_c19157/f1p0/645	PREDICTED: peroxiredoxin-2B [Sesamum indicum]
		i1_HQ_K_c87175/f4p0/1210	PREDICTED: haloacid dehalogenase-like hydrolase domain-containing protein 3 [Ziziphus jujuba]
		i1_HQ_K_c80448/f9p0/1118	14-3-3 protein [Vitis vinifera]
		i1_HQ_K_c67014/f12p1/1385	Kelch repeat type 1 [Cynara cardunculus var. scolymus]
		i1_HQ_K_c4802/f3p2/1365	sucrose responsive element binding protein [Vitis vinifera]
		i1_HQ_K_c44803/f5p1/1035	caffeoyl-CoA-O-methyltransferase [Broussonetia papyrifera]
		i1_LQ_K_c27777/f1p1/1771	PREDICTED: probable fructose-bisphosphate aldolase 3, chloroplastic [Sesamum indicum]
		i1_HQ_K_c17831/f3p1/1347	cinnamyl alcohol dehydrogenase 1 [Camellia sinensis]
		i1_HQ_K_c49575/f24p6/1658	monodehydroascorbate reductase [Camellia sinensis]
		i1_LQ_K_c78476/f1p7/1290	epoxide hydrolase [Solanum tuberosum]
		i1_LQ_K_c70105/f1p0/1837	PREDICTED: glyceraldehyde-3-phosphate dehydrogenase GAPCP2, chloroplastic-like isoform X2 [Juglans regia]
		i0_LQ_K_c15501/f1p1/404	PREDICTED: UPF0057 membrane protein At2g24040-like [Daucus carota subsp. sativus]
		i0_LQ_K_c39172/f1p0/620	metallothionein type 2 [Ilex paraguariensis]
		i0_HQ_K_c34287/f55p0/491	PREDICTED: defensin-like protein 19 [Cicer arietinum]
		i1_HQ_K_c81875/f2p10/1033	PREDICTED: pro-hevein [Ricinus communis]
		i0_LQ_K_c34451/f1p0/785	bet v 1 related allergen [Actinidia chinensis]
		i0_HQ_K_c17785/f3p0/510	PREDICTED: metallothionein-like protein type 2 [Gossypium raimondii]
		i0_LQ_K_c20665/f1p12/905	PREDICTED: barwin-like [Juglans regia]
		i0_LQ_K_c1219/f2p0/633	metallothionein type 2 [Ilex paraguariensis]
		i0_LQ_K_c30069/f1p0/293	PREDICTED: protein SRC1-like [Ziziphus jujuba]
		i0_LQ_K_c24253/f1p0/1000	bet v 1 related allergen [Actinidia chinensis]
		i0_LQ_K_c28146/f1p7/743	metallothionein type 2 [Ilex paraguariensis]
		i0_HQ_K_c10255/f3p17/519	metallothionein-like protein MT1A [Salix matsudana]
		i0_LQ_K_c13647/f1p0/879	PREDICTED: dehydrin ERD14 [Vitis vinifera]
		i0_HQ_K_c8782/f3p0/719	PREDICTED: auxin-repressed 12.5 kDa protein-like [Juglans regia]
		i1_HQ_K_c87353/f40p1/1152	PREDICTED: aquaporin PIP1-3 [Theobroma cacao]
		i0_HQ_K_c17433/f5p0/856	bet v 1 related allergen [Actinidia chinensis]
		i0_LQ_K_c3382/f1p36/529	PREDICTED: translationally-controlled tumor protein homolog [Daucus carota subsp. sativus]
		i1_LQ_K_c35742/f1p29/1767	metallothionein type 2 [Ilex paraguariensis]
		i0_LQ_K_c33568/f29p0/712	PREDICTED: ubiquitin-40S ribosomal protein S27a-like [Populus euphratica]
		i1_LQ_K_c76382/f1p0/1426	peroxidase [Camellia oleifera]
		i1_HQ_K_c1939/f10p4/1378	PREDICTED: probable mannitol dehydrogenase [Vitis vinifera]
		i0_HQ_K_c17323/f7p0/600	PREDICTED: defensin-like protein 1 [Juglans regia]
		i0_LQ_K_c24600/f1p0/947	PREDICTED: hevein-like preproprotein [Citrus sinensis]
		i0_HQ_K_c17947/f3p0/854	PREDICTED: organ-specific protein P4-like isoform X2 [Populus euphratica]
		i0_HQ_K_c33800/f8p1/499	PREDICTED: defensin-like protein 19 [Cicer arietinum]
		i1_LQ_K_c83553/f1p14/1076	pathogenesis-related protein 1 [Actinidia eriantha]
		i0_LQ_K_c11817/f1p0/541	PREDICTED: protein SRC1-like [Ziziphus jujuba]
		i0_HQ_K_c16577/f26p0/800	PREDICTED: HMG1/2-like protein [Nelumbo nucifera]
		i0_HQ_K_c8416/f2p0/626	SKP1 component [Corchorus capsularis]
		i0_HQ_K_c34199/f44p0/609	PREDICTED: cysteine proteinase inhibitor A-like [Nicotiana sylvestris]
		i1_LQ_K_c71975/f1p0/1576	actinidin Act2d [Actinidia eriantha]
		i0_HQ_K_c769/f6p0/655	PREDICTED: 60S ribosomal protein L27-3 [Vitis vinifera]
		i0_HQ_K_c33207/f25p0/502	PREDICTED: peptidyl-prolyl cis-trans isomerase FKBP12 isoform X2 [Nelumbo nucifera]
		i1_HQ_K_c95020/f6p1/1248	Gp_dh_N domain-containing protein/Gp_dh_C domain-containing protein [Cephalotus follicularis]
		i1_LQ_K_c51737/f1p1/1228	peroxidase [Camellia oleifera]
		i0_LQ_K_c13533/f1p287/746	PREDICTED: defensin-like protein 1 [Juglans regia]
		i0_LQ_K_c19202/f1p0/516	PREDICTED: glycine-rich RNA-binding protein 2-like [Sesamum indicum]
		i2_LQ_K_c60389/f1p0/2870	sucrose synthase [Actinidia chinensis]
		i0_HQ_K_c17212/f11p0/634	drought-induced protein [Retama raetam]
		i0_LQ_K_c11581/f1p0/613	PREDICTED: 60S ribosomal protein L23A isoform X1 [Glycine max]
		i1_LQ_K_c28845/f1p2/1539	PREDICTED: glyceraldehyde-3-phosphate dehydrogenase, cytosolic [Vitis vinifera]
		i0_HQ_K_c3489/f4p2/432	BnaC02g12080D [Brassica napus]
		i1_LQ_K_c48275/f1p16/1039	thaumatin-like protein [Actinidia deliciosa]
		i0_HQ_K_c1499/f8p12/612	metallothionein type 2 [Ilex paraguariensis]
		i0_HQ_K_c33198/f18p0/697	PREDICTED: probable histone H2A.1 [Daucus carota subsp. sativus]
		i0_HQ_K_c16734/f4p0/565	PREDICTED: putative lipid-transfer protein DIR1 [Pyrus x bretschneideri]
		i0_HQ_K_c16759/f22p0/602	PREDICTED: 60S ribosomal protein L21-1 [Daucus carota subsp. sativus]
		i0_HQ_K_c33235/f22p0/657	40S ribosomal protein s17 [Camellia sinensis]
		i1_HQ_K_c88117/f13p2/1114	PREDICTED: 14-3-3-like protein A [Theobroma cacao]
		i0_HQ_K_c34136/f24p0/714	PREDICTED: protein SRC1-like [Ziziphus jujuba]
		i0_HQ_K_c2311/f6p0/611	PREDICTED: non-specific lipid-transfer protein 8 [Sesamum indicum]
		i0_HQ_K_c1640/f3p0/675	PREDICTED: 60S ribosomal protein L44-like [Gossypium hirsutum]
		i0_LQ_K_c18808/f1p0/894	ADP-ribosylation factor, partial [Hyacinthus orientalis]
		i1_LQ_K_c31865/f1p0/1079	PREDICTED: 40S ribosomal protein S8 [Sesamum indicum]
		i0_HQ_K_c418/f5p0/563	PREDICTED: 40S ribosomal protein S27-2 [Nelumbo nucifera]
		i1_LQ_K_c95627/f1p0/1002	PREDICTED: peroxidase 42 [Ricinus communis]
		i0_HQ_K_c2270/f2p0/534	PREDICTED: esterase CG5412-like [Ipomoea nil]
		i0_LQ_K_c11177/f1p3/806	PREDICTED: defensin-like protein 1 [Juglans regia]
		i1_LQ_K_c86687/f1p5/1118	PREDICTED: stem-specific protein TSJT1-like [Gossypium arboreum]
		i1_HQ_K_c66904/f25p10/1852	PREDICTED: vicianin hydrolase-like [Ziziphus jujuba]
		i1_LQ_K_c23056/f1p0/1703	peroxidase [Camellia oleifera]
		i0_LQ_K_c11137/f1p0/671	40S ribosomal protein s17 [Camellia sinensis]
		i0_HQ_K_c565/f10p0/677	PREDICTED: 40S ribosomal protein S16 [Theobroma cacao]
		i0_LQ_K_c29231/f1p0/584	PREDICTED: cysteine proteinase inhibitor A [Cucumis sativus]
		i0_LQ_K_c29541/f1p0/825	PREDICTED: translationally-controlled tumor protein homolog [Vitis vinifera]
		i2_LQ_K_c82487/f1p6/2424	PREDICTED: non-symbiotic hemoglobin 1 [Jatropha curcas]
		i0_HQ_K_c1052/f11p0/609	Ubiquitin-60S ribosomal protein L40 [Glycine soja]
		i0_HQ_K_c1387/f7p0/743	60S acidic ribosomal protein P2B, partial [Anthurium amnicola]
		i0_LQ_K_c34690/f1p0/455	40S ribosomal protein s21e [Camellia sinensis]
		i1_HQ_K_c88917/f10p0/1076	PREDICTED: 40S ribosomal protein S3-3-like [Nelumbo nucifera]
		i1_HQ_K_c86951/f93p2/1507	PREDICTED: 60S acidic ribosomal protein P0-like [Gossypium hirsutum]
		i1_HQ_K_c68653/f13p0/1384	PREDICTED: probable mannitol dehydrogenase [Vitis vinifera]
		i0_HQ_K_c33351/f10p0/628	PREDICTED: 60S ribosomal protein L27a-3 [Vitis vinifera]
		i0_LQ_K_c12962/f1p1/463	PREDICTED: 40S ribosomal protein S28-1 [Cucumis melo]
		i1_LQ_K_c73071/f1p1/1745	PREDICTED: vicianin hydrolase-like [Populus euphratica]
		i0_HQ_K_c33640/f35p0/802	PREDICTED: 60S ribosomal protein L18-2 [Eucalyptus grandis]
		i1_HQ_K_c68007/f11p0/1149	PREDICTED: ferritin-3, chloroplastic [Ziziphus jujuba]
		i0_LQ_K_c24118/f1p3/800	PREDICTED: 60S ribosomal protein L34 [Vigna angularis]
		i0_LQ_K_c24845/f1p0/574	PREDICTED: 60S ribosomal protein L36-2-like [Nicotiana sylvestris]
		i1_HQ_K_c29721/f2p8/1025	thaumatin-like protein [Actinidia chinensis]
		i0_HQ_K_c33645/f29p0/848	PREDICTED: peroxiredoxin-2B [Erythranthe guttata]
		i1_HQ_K_c44584/f20p5/1087	ascorbate peroxidase [Camellia azalea]
		i0_HQ_K_c34160/f31p0/833	PREDICTED: HMG1/2-like protein [Nelumbo nucifera]
		i0_LQ_K_c6138/f1p17/662	PREDICTED: 60S ribosomal protein L36-3 [Theobroma cacao]
		i0_HQ_K_c33292/f5p0/757	PREDICTED: 40S ribosomal protein S19-3-like [Eucalyptus grandis]
		i1_HQ_K_c18819/f3p0/1277	caffeic acid O-methyltransferase [Camellia sinensis]
		i1_LQ_K_c89858/f1p2/1645	PREDICTED: elongation factor 1-alpha [Juglans regia]
		i0_LQ_K_c14325/f1p0/799	40s ribosomal protein s15, partial [Nicotiana attenuata]
		i1_HQ_K_c61724/f12p5/1039	ascorbate peroxidase [Camellia azalea]
		i0_HQ_K_c1522/f4p4/861	eukaryotic translation initiation factor 5A4 [Camellia sinensis]
		i1_HQ_K_c89003/f52p4/1355	PREDICTED: probable mannitol dehydrogenase [Vitis vinifera]
		i1_HQ_K_c67924/f15p2/1493	PREDICTED: cysteine proteinase 15A-like [Vigna radiata var. radiata]
		i1_LQ_K_c95588/f1p0/1020	40S ribosomal protein S6-like isoform X2 [Ananas comosus]
		i0_LQ_K_c12805/f1p5/542	60S acidic ribosomal protein [Zostera marina]
		i0_HQ_K_c12468/f2p5/598	metallothionein type 2 [Ilex paraguariensis]
		i0_HQ_K_c774/f9p0/786	PREDICTED: remorin [Ricinus communis]
		i1_LQ_K_c50182/f9p3/1213	PREDICTED: annexin D1-like [Sesamum indicum]
		i0_HQ_K_c1416/f5p0/513	PREDICTED: putative lipid-transfer protein DIR1 [Ricinus communis]
		i0_LQ_K_c23479/f1p0/990	PREDICTED: peptidyl-prolyl cis-trans isomerase [Ricinus communis]
		i0_LQ_K_c10033/f1p0/767	Ribosomal protein 60S [Corchorus olitorius]
		i1_HQ_K_c80484/f8p1/1098	PREDICTED: 40S ribosomal protein S4-like [Ziziphus jujuba]
		i1_HQ_K_c87971/f24p1/1593	calreticulin-2-like [Brassica napus]
		i0_HQ_K_c593/f12p0/843	PREDICTED: 40S ribosomal protein S10-1-like [Malus domestica]
		i1_HQ_K_c88439/f13p5/1055	PREDICTED: 40S ribosomal protein S4-3 [Jatropha curcas]
		i0_HQ_K_c2173/f2p0/530	PREDICTED: 60S ribosomal protein L44-like [Gossypium hirsutum]
		i1_HQ_K_c67689/f27p28/1247	PREDICTED: annexin D1 [Eucalyptus grandis]
		i1_HQ_K_c87289/f19p3/1838	PREDICTED: elongation factor 1-alpha [Ziziphus jujuba]
		i1_HQ_K_c1937/f4p2/1858	beta-glucosidase [Populus tomentosa]
		i0_HQ_K_c1678/f5p3/615	metallothionein type 2 [Ilex paraguariensis]
		i1_HQ_K_c87197/f11p1/1284	PREDICTED: B2 protein [Jatropha curcas]
		i1_HQ_K_c88942/f110p6/1386	glyceraldehyde-3-phosphate dehydrogenase, cytosolic-like [Solanum tuberosum]
		i0_HQ_K_c777/f7p0/820	PREDICTED: 60S ribosomal protein L18a [Capsicum annuum]
		i1_HQ_K_c62300/f5p1/1072	triosphosphate isomerase-like protein type II [Dimocarpus longan]
		i0_LQ_K_c3295/f1p1/449	BnaC01g09100D [Brassica napus]
		i0_HQ_K_c1509/f6p57/624	40S ribosomal protein S14-2-like [Solanum tuberosum]
		i0_HQ_K_c17876/f4p0/581	PREDICTED: 60S ribosomal protein L35 [Populus euphratica]
		i0_HQ_K_c17066/f5p0/423	PREDICTED: 40S ribosomal protein S29-like [Ziziphus jujuba]
		i0_LQ_K_c21269/f1p0/706	PREDICTED: 60S ribosomal protein L28-2 [Nelumbo nucifera]
		i0_HQ_K_c998/f7p0/503	PREDICTED: NADH dehydrogenase [ubiquinone] 1 beta subcomplex subunit 3-B-like [Nelumbo nucifera]
		i0_LQ_K_c34486/f1p0/739	60S ribosomal protein L32-1 [Morus notabilis]
		i1_HQ_K_c32909/f10p0/1175	PREDICTED: 60S ribosomal protein L5-1-like [Pyrus x bretschneideri]
		i0_HQ_K_c33437/f29p0/843	PREDICTED: 60S ribosomal protein L13-1 [Ricinus communis]
		i1_LQ_K_c78232/f1p0/1928	RD22-like protein [Camellia sinensis]
		i2_LQ_K_c136101/f1p0/2795	sucrose synthase [Actinidia chinensis]
		i1_HQ_K_c49825/f16p0/1040	PREDICTED: 60S ribosomal protein L7a-1 [Nelumbo nucifera]
		i0_LQ_K_c23024/f1p19/807	class 4 pathogenesis-related family protein [Populus trichocarpa]
		i1_LQ_K_c8609/f1p0/1407	actinidin Act2d [Actinidia eriantha]
		i0_HQ_K_c621/f4p0/765	40s ribosomal protein s15, partial [Nicotiana attenuata]
		i0_HQ_K_c1087/f5p3/796	thioredoxin-dependent peroxidase [Plantago major]
		i1_LQ_K_c55808/f1p3/1493	peroxidase [Camellia oleifera]
		i0_HQ_K_c821/f5p0/823	PREDICTED: peroxiredoxin-2B [Erythranthe guttata]
		i0_HQ_K_c1755/f3p0/770	PREDICTED: 40S ribosomal protein S24-1 [Sesamum indicum]
		i0_HQ_K_c591/f5p0/883	eukaryotic translation initiation factor 5A4 [Populus tomentosa]
		i1_HQ_K_c1737/f5p2/1901	PREDICTED: vicianin hydrolase-like [Populus euphratica]
		i2_LQ_K_c61079/f1p3/2326	PREDICTED: heat shock cognate 70 kDa protein 2 [Ricinus communis]
		i1_LQ_K_c96200/f1p0/1010	PREDICTED: 60S ribosomal protein L19-2 [Vitis vinifera]
		i1_LQ_K_c83222/f1p1/1430	peroxidase [Camellia oleifera]
		i2_LQ_K_c89790/f1p0/2401	RecName: Full=3-hydroxy-3-methylglutaryl-coenzyme A reductase; Short=HMG-CoA reductase
		i3_LQ_K_c12254/f1p1/3121	#N/A
		i1_HQ_K_c8859/f2p0/1247	PREDICTED: alpha-soluble NSF attachment protein-like [Sesamum indicum]
		i0_LQ_K_c16865/f2p0/736	putative glycine-rich RNA-binding protein [Chorispora bungeana]
		i1_LQ_K_c39040/f1p0/1417	PREDICTED: probable mannitol dehydrogenase [Vitis vinifera]
		i0_HQ_K_c16824/f8p0/556	60S acidic ribosomal protein [Zostera marina]
		i0_HQ_K_c6234/f3p0/749	ribosomal protein S24 [Betula luminifera]
		i0_HQ_K_c16877/f8p0/662	PREDICTED: ubiquitin-NEDD8-like protein RUB2 [Prunus mume]
		i1_HQ_K_c12041/f8p7/1399	PREDICTED: bZIP transcription factor 11-like [Nelumbo nucifera]
		i0_HQ_K_c106/f18p0/610	Ubiquitin supergroup,Ribosomal protein L40e [Theobroma cacao]
		i1_LQ_K_c74232/f1p6/1189	PREDICTED: auxin-repressed 12.5 kDa protein-like [Juglans regia]
		i1_HQ_K_c82018/f2p0/1072	ubiquitin-conjugating enzyme [Petunia x hybrida]
		i1_LQ_K_c55317/f1p2/1142	PREDICTED: 40S ribosomal protein S3a-like [Sesamum indicum]
		i0_HQ_K_c2175/f3p0/785	PREDICTED: 60S ribosomal protein L35a-1-like [Populus euphratica]
		i0_HQ_K_c12041/f2p11/638	60s ribosomal protein l37a, partial [Nicotiana attenuata]
		i0_HQ_K_c988/f6p0/878	PREDICTED: 40S ribosomal protein S7 [Ipomoea nil]
		i0_HQ_K_c472/f12p1/917	PREDICTED: nascent polypeptide-associated complex subunit alpha-like protein 1 [Vitis vinifera]
		i0_LQ_K_c24692/f1p2/758	PREDICTED: 60S ribosomal protein L28-2-like [Nelumbo nucifera]
		i0_HQ_K_c722/f3p0/643	PREDICTED: 60S acidic ribosomal protein P3-like [Nelumbo nucifera]
		i0_LQ_K_c11190/f1p0/862	PREDICTED: 60S ribosomal protein L11 [Jatropha curcas]
		i0_HQ_K_c33194/f20p0/631	PREDICTED: 60S ribosomal protein L22-2 [Fragaria vesca subsp. vesca]
		i1_HQ_K_c87446/f22p1/1070	PREDICTED: histone deacetylase HDT1-like [Juglans regia]
		i1_HQ_K_c88791/f48p10/1399	cysteine protease Cp1 [Actinidia deliciosa]
		i1_HQ_K_c80423/f9p9/1093	PREDICTED: glutathione S-transferase [Eucalyptus grandis]
		i0_LQ_K_c12618/f1p0/657	PREDICTED: 60S ribosomal protein L28-2 [Nelumbo nucifera]
		i0_HQ_K_c34201/f7p0/803	ribosomal protein S18 [Rhododendron molle]
		i1_HQ_K_c50780/f3p9/1504	PREDICTED: calreticulin [Sesamum indicum]
		i0_LQ_K_c23754/f1p6/774	60S ribosomal protein L32-1 [Morus notabilis]
		i0_LQ_K_c20172/f1p7/967	PREDICTED: ras-related protein Rab7-like [Sesamum indicum]
		i1_HQ_K_c18699/f3p2/1217	PREDICTED: 60S ribosomal protein L8-3 isoform X1 [Daucus carota subsp. sativus]
		i0_LQ_K_c11662/f1p1/788	Os03g0139100, partial [Oryza sativa Japonica Group]
		i0_HQ_K_c1754/f5p0/923	protein S [Catharanthus roseus]
		i1_HQ_K_c3901/f5p21/1359	PREDICTED: WAT1-related protein At2g39510-like [Ipomoea nil]
		i0_HQ_K_c2336/f4p0/757	Profilin [Corchorus capsularis]
		i0_HQ_K_c2641/f4p0/901	PREDICTED: high mobility group B protein 1-like isoform X1 [Nelumbo nucifera]
		i2_LQ_K_c90579/f1p0/2251	glyceraldehyde-3-phosphate dehydrogenase C [Shorea beccariana]
		i0_HQ_K_c2195/f3p3/657	PREDICTED: 40S ribosomal protein S20-2 [Sesamum indicum]
		i0_HQ_K_c38135/f4p0/681	PREDICTED: glycine-rich RNA-binding protein [Daucus carota subsp. sativus]
		i1_HQ_K_c88710/f16p2/1692	Actin 7 isoform 1 [Theobroma cacao]
		i0_LQ_K_c4090/f1p4/521	PREDICTED: defensin-like protein 19 [Cicer arietinum]
		i1_LQ_K_c57077/f1p2/1488	dehydrin 2 [Eucalyptus nitens]
		i0_LQ_K_c8194/f1p0/476	PREDICTED: probable signal peptidase complex subunit 1 [Citrus sinensis]
		i0_LQ_K_c5959/f1p0/773	PREDICTED: non-specific lipid-transfer protein 8 [Sesamum indicum]
		i0_HQ_K_c1345/f4p5/946	PREDICTED: actin-depolymerizing factor 2 [Populus euphratica]
		i0_HQ_K_c33185/f24p0/938	PREDICTED: 40S ribosomal protein S5 [Juglans regia]
		i0_HQ_K_c6405/f3p0/607	PREDICTED: 60S ribosomal protein L36-2-like [Nicotiana attenuata]
		i0_LQ_K_c2381/f2p0/524	PREDICTED: 60S ribosomal protein L37a-1-like, partial [Camelina sativa]
		i1_HQ_K_c87961/f44p21/1837	PREDICTED: elongation factor 1-alpha [Ziziphus jujuba]
		i1_LQ_K_c73405/f1p10/1016	class 4 pathogenesis-related family protein [Populus trichocarpa]
		i0_HQ_K_c10252/f2p35/677	PREDICTED: 60S ribosomal protein L35 [Theobroma cacao]
		i0_HQ_K_c17685/f6p0/821	PREDICTED: 60S ribosomal protein L13a-4 [Sesamum indicum]
		i0_LQ_K_c8469/f1p0/917	Peptidyl-prolyl cis-trans isomerase CYP19-4 [Morus notabilis]
		i0_HQ_K_c2189/f7p1/848	PREDICTED: 60S ribosomal protein L11 [Jatropha curcas]
		i0_LQ_K_c22588/f1p4/736	PREDICTED: 60S ribosomal protein L31 [Juglans regia]
		i0_LQ_K_c11686/f1p0/803	DNA-directed RNA polymerase IIa [Panax ginseng]
		i0_HQ_K_c1446/f5p0/970	allene oxide cyclase [Camellia sinensis]
		i0_LQ_K_c18188/f1p0/639	PREDICTED: 40S ribosomal protein S27-2-like [Musa acuminata subsp. malaccensis]
		i0_HQ_K_c33392/f2p4/749	PREDICTED: outer envelope pore protein 16, chloroplastic [Nicotiana tomentosiformis]
		i0_LQ_K_c32884/f1p0/611	PREDICTED: 40S ribosomal protein S27-2 [Nelumbo nucifera]
		i0_LQ_K_c9639/f3p13/634	PREDICTED: small nuclear ribonucleoprotein Sm D2 isoform X1 [Ricinus communis]
		i1_HQ_K_c87375/f24p4/1459	Ankyrin repeat domain-containing protein 2 [Morus notabilis]
		i0_HQ_K_c16769/f10p0/571	PREDICTED: cysteine proteinase inhibitor A-like [Nicotiana tabacum]
		i0_LQ_K_c35207/f1p0/826	ribosomal protein S18 [Rhododendron molle]
		i1_HQ_K_c13360/f14p2/1349	PREDICTED: probable mannitol dehydrogenase [Vitis vinifera]
		i2_HQ_K_c36236/f4p6/2335	PREDICTED: NADP-dependent malic enzyme isoform X1 [Elaeis guineensis]
		i1_HQ_K_c61652/f14p3/1067	PREDICTED: probable 6-phosphogluconolactonase 4, chloroplastic isoform X2 [Nelumbo nucifera]
		i0_HQ_K_c33257/f13p0/617	protein SRC1 [Glycine max]
		i1_HQ_K_c87796/f52p3/1431	PREDICTED: peroxidase 12 [Theobroma cacao]
		i0_LQ_K_c6627/f1p0/622	PREDICTED: probable signal peptidase complex subunit 1 [Daucus carota subsp. sativus]
		i0_LQ_K_c22271/f1p0/566	BnaC02g12080D [Brassica napus]
		i1_LQ_K_c20630/f1p4/1785	PREDICTED: tubulin alpha chain-like [Phoenix dactylifera]
		i1_HQ_K_c81537/f5p1/1247	PREDICTED: protein CDI-like [Nicotiana tabacum]
		i0_HQ_K_c33728/f3p0/647	PREDICTED: 60S ribosomal protein L35 [Populus euphratica]
		i0_LQ_K_c5397/f1p0/633	ubiquinol-cytochrome C reductase complex [Camellia sinensis]
		i1_HQ_K_c819/f23p0/1687	Homeobox protein, putative isoform 1 [Theobroma cacao]
		i0_LQ_K_c3018/f1p7/449	PREDICTED: uncharacterized protein LOC108999191 [Juglans regia]
		i1_LQ_K_c7095/f1p15/1183	RecName: Full=40S ribosomal protein S3a; AltName: Full=CYC07 protein
		i0_LQ_K_c20039/f1p0/760	PREDICTED: 40S ribosomal protein S14-like [Nelumbo nucifera]
		i0_HQ_K_c4707/f4p0/773	PREDICTED: profilin-2 [Gossypium hirsutum]
		i1_HQ_K_c31982/f34p1/1382	RD22-like protein [Camellia sinensis]
		i0_HQ_K_c1894/f5p3/681	PREDICTED: 60S ribosomal protein L12 [Phoenix dactylifera]
		i0_LQ_K_c19334/f1p1/593	PREDICTED: abscisic stress-ripening protein 1-like [Juglans regia]
		i0_LQ_K_c2849/f1p0/734	PREDICTED: ubiquitin-40S ribosomal protein S27a-like [Populus euphratica]
		i1_LQ_K_c77808/f1p1/1851	elongation factor 1-alpha [Lycoris longituba]
		i1_LQ_K_c72816/f1p1/1558	PREDICTED: repetitive proline-rich cell wall protein 1-like isoform X4 [Gossypium raimondii]
		i0_LQ_K_c5509/f1p1/768	PREDICTED: uncharacterized protein LOC105761064 isoform X1 [Gossypium raimondii]
		i0_HQ_K_c33196/f13p0/560	40S ribosomal protein s21e [Camellia sinensis]
		i1_LQ_K_c60225/f1p0/1472	PREDICTED: vicianin hydrolase-like [Ziziphus jujuba]
		i0_HQ_K_c34636/f3p0/638	PREDICTED: 14 kDa zinc-binding protein-like [Sesamum indicum]
		i0_LQ_K_c14405/f1p0/520	tubulin beta-1 chain-like [Ananas comosus]
		i0_LQ_K_c1516/f1p0/606	Inhibitor_I9 domain-containing protein [Cephalotus follicularis]
		i2_LQ_K_c8417/f1p7/2957	non-symbiotic hemoglobin, putative [Ricinus communis]
		i1_HQ_K_c87875/f10p2/1430	thiamine thiazole synthase, chloroplastic-like [Gossypium hirsutum]
		i1_HQ_K_c88983/f158p1/1899	PREDICTED: elongation factor 1-alpha [Juglans regia]
		i0_HQ_K_c1031/f8p0/476	PREDICTED: probable small nuclear ribonucleoprotein G [Erythranthe guttata]
		i1_HQ_K_c80788/f6p0/1054	PREDICTED: 40S ribosomal protein S3-3-like [Nelumbo nucifera]
		i0_HQ_K_c33717/f6p0/552	PREDICTED: 40S ribosomal protein S27-2-like [Musa acuminata subsp. malaccensis]
		i1_HQ_K_c45458/f2p9/1094	20S proteasome alpha subunit C1 isoform 1 [Theobroma cacao]
		i0_HQ_K_c28778/f2p0/825	PREDICTED: 60S ribosomal protein L18a [Capsicum annuum]
		i0_LQ_K_c7917/f5p0/791	PREDICTED: SKP1-like protein 1A [Nicotiana tabacum]
		i0_LQ_K_c1751/f2p1/845	PREDICTED: 40S ribosomal protein S11 [Gossypium arboreum]
		i1_HQ_K_c81415/f3p0/1059	PREDICTED: CBS domain-containing protein CBSX3, mitochondrial [Daucus carota subsp. sativus]
		i0_LQ_K_c5766/f1p0/965	PREDICTED: 60S ribosomal protein L13a-4 [Sesamum indicum]
		i0_LQ_K_c25211/f1p0/701	PREDICTED: 60S ribosomal protein L31 [Cucumis melo]
		i0_LQ_K_c20075/f1p2/836	PREDICTED: hevein-like preproprotein [Citrus sinensis]
		i0_HQ_K_c11830/f2p0/782	PREDICTED: 40S ribosomal protein S24-1-like [Sesamum indicum]
		i1_LQ_K_c72286/f1p2/1772	PREDICTED: protein SRC1-like [Ziziphus jujuba]
		i0_HQ_K_c17446/f8p0/841	PREDICTED: 1,2-dihydroxy-3-keto-5-methylthiopentene dioxygenase 2 [Nicotiana tomentosiformis]
		i1_HQ_K_c32812/f25p2/1372	PREDICTED: NDR1/HIN1-like protein 12 [Pyrus x bretschneideri]
		i0_HQ_K_c1110/f10p0/926	Ribosomal_L6e domain-containing protein/Ribosomal_L6e_N domain-containing protein [Cephalotus follicularis]
		i1_LQ_K_c87026/f1p1/1475	squalene synthase [Camellia oleifera]
		i0_HQ_K_c11050/f3p1/776	PREDICTED: ubiquitin-conjugating enzyme E2 5B [Erythranthe guttata]
		i1_LQ_K_c43899/f1p1/1777	PREDICTED: tubulin alpha chain-like [Phoenix dactylifera]
		i0_HQ_K_c2538/f5p3/960	RecName: Full=Kirola; AltName: Allergen=Act d 11
		i0_HQ_K_c1418/f4p0/676	ribosomal protein L33 [Populus trichocarpa]
		i0_HQ_K_c1287/f4p0/639	PREDICTED: 60S ribosomal protein L30 [Daucus carota subsp. sativus]
		i0_HQ_K_c810/f5p0/744	eukaryotic translation initiation factor 5A4 [Camellia sinensis]
		i1_LQ_K_c5529/f1p1/1265	PREDICTED: 40S ribosomal protein SA-like [Cucumis melo]
		i0_HQ_K_c1225/f6p0/539	PREDICTED: ATP synthase subunit epsilon, mitochondrial [Citrus sinensis]
		i0_LQ_K_c17072/f3p0/700	40S ribosomal protein S15a-1 [Glycine soja]
		i3_LQ_K_c12589/f1p0/3064	#N/A
		i0_LQ_K_c2101/f1p0/734	60S ribosomal protein L35a-3 [Medicago truncatula]
		i0_HQ_K_c980/f6p0/955	PREDICTED: lachrymatory-factor synthase [Vitis vinifera]
		i0_HQ_K_c369/f8p0/731	eukaryotic translation initiation factor 5A4 [Camellia sinensis]
		i1_LQ_K_c59380/f1p2/1392	PREDICTED: cysteine proteinase 15A-like [Vigna radiata var. radiata]
		i0_HQ_K_c2618/f3p0/968	PREDICTED: 40S ribosomal protein S7 [Ipomoea nil]
		i0_LQ_K_c4347/f1p0/799	PREDICTED: hevein-like preproprotein [Citrus sinensis]
		i0_HQ_K_c33385/f3p0/706	PREDICTED: ubiquitin-NEDD8-like protein RUB2 [Prunus mume]
		i0_LQ_K_c8768/f1p0/654	Os03g0139100, partial [Oryza sativa Japonica Group]
		i2_HQ_K_c170591/f24p6/2230	PREDICTED: heat shock cognate 70 kDa protein 2 [Ricinus communis]
		i1_HQ_K_c8583/f4p3/1726	elongation factor 1-gamma [Oryza sativa Japonica Group]
		i0_LQ_K_c11382/f1p0/511	heavy metal transport/detoxification superfamily protein [Medicago truncatula]
		i1_HQ_K_c3648/f7p2/1376	farnesyl diphosphate synthase [Camellia sinensis]
		i0_LQ_K_c22689/f1p0/416	PREDICTED: NADH dehydrogenase [ubiquinone] 1 alpha subcomplex subunit 2-like [Juglans regia]
		i0_HQ_K_c4250/f2p1/922	PREDICTED: 60S ribosomal protein L13a-4-like [Nicotiana attenuata]
		i0_HQ_K_c2088/f3p0/859	PREDICTED: 60S ribosomal protein L11 [Jatropha curcas]
		i0_HQ_K_c4617/f5p5/739	eukaryotic translation initiation factor 5A4 [Camellia sinensis]
		i1_HQ_K_c18331/f2p0/1190	Elongation factor 1-delta [Zostera marina]
		i0_HQ_K_c1733/f2p4/849	acyl carrier protein [Camellia japonica]
		i1_HQ_K_c88027/f8p1/1153	Small GTPase superfamily [Corchorus olitorius]
		i0_LQ_K_c3753/f1p0/447	Metallothionein-like protein 2 [Glycine soja]
		i0_LQ_K_c36196/f1p1/709	PREDICTED: 60S ribosomal protein L22-2-like [Ziziphus jujuba]
		i0_HQ_K_c18357/f2p0/520	PREDICTED: uncharacterized protein LOC100245204 isoform X1 [Vitis vinifera]
		i1_LQ_K_c87780/f12p1/1680	elongation factor 1-gamma [Oryza sativa Japonica Group]
		i0_HQ_K_c9837/f3p0/567	60s ribosomal protein l30-2, partial [Nicotiana attenuata]
		i1_HQ_K_c68063/f37p1/1397	chitodextrinase [Eucommia ulmoides]
		i0_HQ_K_c1624/f6p1/958	PREDICTED: 60S ribosomal protein L10a [Musa acuminata subsp. malaccensis]
		i0_LQ_K_c4121/f1p0/949	bet v 1 related allergen [Actinidia deliciosa]
		i1_LQ_K_c86688/f1p1/1028	PREDICTED: GATA transcription factor 2-like [Daucus carota subsp. sativus]
		i0_HQ_K_c17129/f2p0/541	PREDICTED: RING-box protein 1a [Elaeis guineensis]
		i0_LQ_K_c11869/f1p0/864	PREDICTED: histone deacetylase HDT1 [Vitis vinifera]
		i1_HQ_K_c28190/f3p2/1721	Actin 7 isoform 1 [Theobroma cacao]
		i1_LQ_K_c11843/f1p14/1481	PREDICTED: organ-specific protein P4-like [Nicotiana sylvestris]
		i0_HQ_K_c1026/f6p0/887	PREDICTED: ADP-ribosylation factor 1 isoform X2 [Tarenaya hassleriana]
		i2_LQ_K_c80783/f1p4/2319	PREDICTED: FRIGIDA-like protein 4a [Vitis vinifera]
		i1_LQ_K_c79119/f1p4/1161	PREDICTED: outer envelope pore protein 16, chloroplastic [Nicotiana tomentosiformis]
		i2_LQ_K_c110617/f1p4/2336	#N/A
		i0_HQ_K_c9997/f2p2/639	Zinc-binding ribosomal family protein [Theobroma cacao]
		i1_HQ_K_c733/f7p4/1362	farnesyl diphosphate synthase [Camellia sinensis]
		i1_LQ_K_c15894/f1p5/1041	PREDICTED: ubiquitin-conjugating enzyme E2 7 [Daucus carota subsp. sativus]
		i0_LQ_K_c33249/f5p0/764	Translation initiation factor 1A [Zostera marina]
		i1_HQ_K_c59283/f3p2/1282	PREDICTED: guanine nucleotide-binding protein subunit beta-like protein [Erythranthe guttata]
		i0_HQ_K_c1370/f5p0/698	60s ribosomal protein l30-2, partial [Nicotiana attenuata]
		i0_HQ_K_c2238/f2p0/751	PREDICTED: ubiquitin-conjugating enzyme E2 36 [Theobroma cacao]
		i1_HQ_K_c66958/f3p0/1487	Homeobox protein, putative isoform 1 [Theobroma cacao]
		i1_LQ_K_c51392/f1p1/1392	Ribosomal protein L10 family protein isoform 1 [Theobroma cacao]
		i0_HQ_K_c27939/f3p0/719	Translation initiation factor 1A [Zostera marina]
		i0_LQ_K_c18423/f2p0/659	60S acidic ribosomal protein [Zostera marina]
		i0_HQ_K_c12075/f4p1/657	60s ribosomal protein l35-4, partial [Nicotiana attenuata]
		i0_HQ_K_c26394/f3p0/525	PREDICTED: 60S ribosomal protein L38 [Tarenaya hassleriana]
		i0_HQ_K_c25980/f4p1/926	PREDICTED: uncharacterized protein LOC105160688 [Sesamum indicum]
		i0_LQ_K_c14442/f1p3/874	eukaryotic translation initiation factor 5A4 [Camellia sinensis]
		i1_HQ_K_c81918/f2p0/1061	Elongation factor 1-delta [Zostera marina]
		i1_LQ_K_c56369/f1p12/1172	PREDICTED: transport and Golgi organization 2 homolog [Juglans regia]
		i0_LQ_K_c2956/f2p12/517	metallothionein-like protein MT1A [Salix matsudana]
		i0_LQ_K_c14426/f1p5/737	PREDICTED: protein YLS3 [Nelumbo nucifera]
		i0_HQ_K_c7483/f4p2/689	PREDICTED: protein SPIRAL1-like 1 [Ipomoea nil]
		i0_HQ_K_c14099/f2p2/915	PREDICTED: ATP synthase subunit d, mitochondrial [Sesamum indicum]
		i1_LQ_K_c69835/f1p0/1538	PREDICTED: protein WALLS ARE THIN 1 [Theobroma cacao]
		i1_LQ_K_c36706/f1p14/1918	elongation factor 1 alpha [Actinidia deliciosa]
		i0_HQ_K_c1869/f3p0/649	pollen-specific protein [Vitis pseudoreticulata]
		i0_HQ_K_c1071/f5p0/857	chalcone isomerase [Actinidia chrysantha]
		i0_HQ_K_c33203/f10p0/643	PREDICTED: glutaredoxin-like [Juglans regia]
		i0_LQ_K_c27252/f1p1/642	PREDICTED: 60S ribosomal protein L27-3 [Vitis vinifera]
		i0_HQ_K_c33419/f8p0/729	RecName: Full=Histone H3.3
		i1_LQ_K_c57617/f1p0/1758	cysteine protease Cp6 [Actinidia deliciosa]
		i0_HQ_K_c12321/f2p0/584	PREDICTED: probable steroid-binding protein 3 [Arachis duranensis]
		i1_LQ_K_c74501/f1p0/1117	Elongation factor 1-delta [Zostera marina]
		i1_LQ_K_c88129/f1p1/1589	PREDICTED: vicianin hydrolase-like [Populus euphratica]
		i0_HQ_K_c367/f8p0/805	PREDICTED: ubiquitin-conjugating enzyme E2 10-like [Gossypium hirsutum]
		i0_LQ_K_c12717/f1p1/575	Like-Sm (LSM) domain-containing protein, partial [Cynara cardunculus var. scolymus]
		i0_LQ_K_c11958/f2p2/694	PREDICTED: 60S ribosomal protein L34 [Ziziphus jujuba]
		i1_HQ_K_c28034/f4p0/1262	PREDICTED: peroxidase 21 [Theobroma cacao]
		i0_HQ_K_c1654/f6p14/745	PREDICTED: 40S ribosomal protein S13 [Erythranthe guttata]
		i1_HQ_K_c5423/f11p4/1177	Gp_dh_N domain-containing protein/Gp_dh_C domain-containing protein [Cephalotus follicularis]
		i1_HQ_K_c15711/f4p0/1124	PREDICTED: aquaporin TIP1-3 [Theobroma cacao]
		i1_HQ_K_c21526/f2p0/1542	PREDICTED: cysteine proteinase 15A-like [Vigna radiata var. radiata]
		i0_HQ_K_c18266/f2p0/860	PREDICTED: 60S ribosomal protein L23A [Sesamum indicum]
		i0_HQ_K_c1880/f2p2/910	PREDICTED: 40S ribosomal protein S10-1-like [Fragaria vesca subsp. vesca]
		i0_HQ_K_c1756/f5p0/927	PREDICTED: 40S ribosomal protein S5 [Juglans regia]
		i0_HQ_K_c18519/f2p0/812	PREDICTED: 60S ribosomal protein L12 [Ziziphus jujuba]
		i0_HQ_K_c3532/f2p2/987	PREDICTED: ESCRT-related protein CHMP1B [Vitis vinifera]
		i1_LQ_K_c59841/f1p1/1460	PREDICTED: 60S ribosomal protein L8 [Daucus carota subsp. sativus]
		i0_LQ_K_c24012/f1p0/781	PREDICTED: 40S ribosomal protein S16-like [Ziziphus jujuba]
		i3_LQ_K_c13448/f1p0/3072	#N/A
		i0_LQ_K_c2483/f2p2/641	NADH:ubiquinone oxidoreductase, ESSS subunit [Cynara cardunculus var. scolymus]
		i1_LQ_K_c95557/f1p0/1013	PREDICTED: 40S ribosomal protein S8 [Elaeis guineensis]
		i1_HQ_K_c32453/f3p0/1168	PREDICTED: V-type proton ATPase subunit D [Theobroma cacao]
		i0_HQ_K_c18416/f2p0/634	Ribosomal_L36e domain-containing protein [Cephalotus follicularis]
		i1_HQ_K_c48838/f5p1/1593	PREDICTED: ADP,ATP carrier protein, mitochondrial-like [Ipomoea nil]
		i0_LQ_K_c8145/f1p0/809	PREDICTED: prostatic spermine-binding protein [Vitis vinifera]
		i1_HQ_K_c33851/f2p3/1192	stem-specific protein TSJT1-like [Gossypium hirsutum]
		i0_HQ_K_c33379/f4p0/699	PREDICTED: actin-depolymerizing factor 2-like [Nelumbo nucifera]
		i1_LQ_K_c14088/f1p1/1344	PREDICTED: 2-alkenal reductase (NADP(+)-dependent) [Vitis vinifera]
		i1_LQ_K_c43781/f1p4/1720	Regulatory particle triple-A 1A [Dorcoceras hygrometricum]
		i0_LQ_K_c28829/f1p0/647	PREDICTED: 10 kDa chaperonin-like [Musa acuminata subsp. malaccensis]
		i2_LQ_K_c151288/f1p5/2488	#N/A
		i1_HQ_K_c4615/f6p2/1834	actin [Phlomis umbrosa]
		i0_HQ_K_c18213/f2p0/864	Skp1-like protein 3 [Petunia integrifolia subsp. inflata]
		i0_LQ_K_c2787/f1p0/587	Ribosomal protein S8, partial [Cynara cardunculus var. scolymus]
		i1_HQ_K_c81412/f3p0/1114	PREDICTED: aquaporin TIP1-1 [Eucalyptus grandis]
		i0_LQ_K_c6968/f1p0/888	PREDICTED: glycine-rich RNA-binding protein RZ1A [Cucumis sativus]
		i1_HQ_K_c87487/f2p1/1661	PREDICTED: tubulin beta-6 chain isoform X1 [Beta vulgaris subsp. vulgaris]
		i1_HQ_K_c88000/f8p2/1136	xyloglucan endotransglucosylase/hydrolase 8 [Actinidia deliciosa]
		i1_HQ_K_c33702/f5p0/1317	Mov34/MPN/PAD-1 family protein [Theobroma cacao]
		i1_HQ_K_c88765/f90p2/1919	PREDICTED: protein disulfide-isomerase [Vitis vinifera]
		i0_LQ_K_c19429/f1p2/981	PREDICTED: 60S ribosomal protein L13-1 [Ricinus communis]
		i1_LQ_K_c83457/f1p3/1040	PREDICTED: elongation factor 1-beta 2-like [Erythranthe guttata]
		i0_LQ_K_c10919/f1p4/674	PREDICTED: 40S ribosomal protein S18-like [Nicotiana tabacum]
		i0_LQ_K_c23019/f1p0/706	PREDICTED: abscisic stress-ripening protein 2-like [Nicotiana sylvestris]
		i0_HQ_K_c5240/f4p2/608	Peptidyl-prolyl cis-trans isomerase Pin1 [Gossypium arboreum]
		i0_HQ_K_c2197/f5p3/873	PREDICTED: 36.4 kDa proline-rich protein [Vitis vinifera]
		i1_LQ_K_c26441/f1p11/1585	PREDICTED: pro-hevein-like [Populus euphratica]
		i0_LQ_K_c13505/f1p0/713	bet v 1 related allergen [Actinidia chinensis]
		i0_HQ_K_c626/f5p0/587	PREDICTED: probable steroid-binding protein 3 [Arachis duranensis]
		i0_HQ_K_c4499/f3p1/684	PREDICTED: NADH dehydrogenase [ubiquinone] iron-sulfur protein 4, mitochondrial-like [Sesamum indicum]
		i1_HQ_K_c88772/f86p3/1892	S-adenosyl-l-homocysteine hydrolase A [Populus tomentosa]
		i0_HQ_K_c16593/f22p0/861	Peptidyl-prolyl cis-trans isomerase CYP19-4 [Morus notabilis]
		i0_HQ_K_c33218/f6p2/526	40S ribosomal protein s21e [Camellia sinensis]
		i0_HQ_K_c2261/f2p1/908	PREDICTED: 60S ribosomal protein L13a-4-like [Nicotiana attenuata]
		i1_HQ_K_c2292/f5p6/1736	PREDICTED: KH domain-containing protein At4g18375-like [Sesamum indicum]
		i1_LQ_K_c77470/f1p0/1264	cinnamate 4-hydroxylase [Camellia sinensis]
		i1_HQ_K_c8100/f5p2/1179	PREDICTED: 40S ribosomal protein SA [Cucumis sativus]
		i0_HQ_K_c1544/f5p0/922	PREDICTED: vacuolar iron transporter 1-like [Nicotiana tabacum]
		i0_HQ_K_c195/f15p0/912	PREDICTED: zinc finger A20 and AN1 domain-containing stress-associated protein 8-like [Pyrus x bretschneideri]
		i0_HQ_K_c33269/f13p0/697	Thioredoxin [Corchorus olitorius]
		i0_LQ_K_c9381/f1p5/969	40S ribosomal protein S7 [Glycine soja]
		i0_HQ_K_c34738/f3p0/632	DAD1 [Petunia x hybrida]
		i0_LQ_K_c20558/f1p5/726	Ole e 5 olive pollen allergen [Olea europaea]
		i0_LQ_K_c3349/f1p3/790	PREDICTED: 60S ribosomal protein L17-2-like [Juglans regia]
		i0_HQ_K_c1417/f3p0/911	PREDICTED: 60S ribosomal protein L9 [Cucumis sativus]
		i1_HQ_K_c1360/f12p0/1589	PREDICTED: guanosine nucleotide diphosphate dissociation inhibitor 2 isoform X1 [Ziziphus jujuba]
		i0_LQ_K_c4456/f1p0/907	PREDICTED: 40S ribosomal protein S19-3-like [Eucalyptus grandis]
		i1_LQ_K_c47767/f1p2/1079	PREDICTED: vicianin hydrolase-like [Solanum pennellii]
		i1_HQ_K_c88841/f43p1/1129	PREDICTED: 14-3-3-like protein GF14 kappa [Daucus carota subsp. sativus]
		i0_HQ_K_c1612/f7p0/787	ribosomal protein S18 [Rhododendron molle]
		i0_HQ_K_c1076/f3p0/733	PREDICTED: 60S ribosomal protein L34-like [Populus euphratica]
		i1_HQ_K_c14062/f3p3/1321	PREDICTED: 60S ribosomal protein L7a-1 [Nelumbo nucifera]
		i1_LQ_K_c31893/f1p1/1099	PREDICTED: ubiquitin-conjugating enzyme E2 32-like [Populus euphratica]
		i0_LQ_K_c21354/f1p0/895	PREDICTED: 36.4 kDa proline-rich protein-like [Gossypium hirsutum]
		i1_LQ_K_c22814/f1p9/1387	Adenosine kinase 2 [Theobroma cacao]
		i1_LQ_K_c96030/f1p0/1004	transcription factor BHLH005, partial [Vaccinium corymbosum]
		i1_HQ_K_c12669/f6p2/1328	PREDICTED: guanine nucleotide-binding protein subunit beta-like protein [Erythranthe guttata]
		i0_HQ_K_c2367/f4p4/714	PREDICTED: signal peptidase complex catalytic subunit SEC11A [Arachis duranensis]
		i0_HQ_K_c7978/f4p18/912	Thioredoxin-like protein YLS8, partial [Noccaea caerulescens]
		i1_HQ_K_c49505/f3p2/1192	14-3-3 protein [Vitis vinifera]
		i0_HQ_K_c1268/f4p0/926	PREDICTED: 60S ribosomal protein L9 [Cucumis sativus]
		i0_HQ_K_c16752/f3p4/897	PREDICTED: peptidyl-prolyl cis-trans isomerase FKBP15-1 [Jatropha curcas]
		i0_HQ_K_c2215/f6p0/696	PREDICTED: 40S ribosomal protein S19-3-like [Eucalyptus grandis]
		i0_HQ_K_c16754/f4p0/907	Peptidyl-prolyl cis-trans isomerase CYP19-4 [Morus notabilis]
		i1_LQ_K_c74935/f1p4/1597	PREDICTED: vicianin hydrolase-like [Populus euphratica]
		i0_HQ_K_c476/f8p2/679	PREDICTED: 40S ribosomal protein S24-1-like [Malus domestica]
		i0_LQ_K_c20469/f1p24/710	PREDICTED: multiprotein-bridging factor 1b [Juglans regia]
		i0_HQ_K_c33329/f2p2/983	PREDICTED: proteasome subunit beta type-6 [Juglans regia]
		i0_LQ_K_c36743/f1p0/698	60S ribosomal protein L32-1 [Morus notabilis]
		i0_HQ_K_c3325/f2p0/889	PREDICTED: 60S ribosomal protein L5-like [Sesamum indicum]
		i1_LQ_K_c63623/f1p0/1050	PREDICTED: proteasome subunit beta type-7-A [Sesamum indicum]
		i0_HQ_K_c4684/f2p0/832	PREDICTED: 60S ribosomal protein L9 [Cucumis sativus]
		i1_HQ_K_c88851/f28p11/1357	PREDICTED: WAT1-related protein At2g39510-like [Ipomoea nil]
		i0_HQ_K_c8874/f5p0/806	peptidyl-prolyl cis-trans isomerase NIMA-interacting 4 [Ananas comosus]
		i0_HQ_K_c1670/f6p2/721	PREDICTED: 40S ribosomal protein S13 [Erythranthe guttata]
		i0_LQ_K_c24837/f1p0/897	PREDICTED: 60S ribosomal protein L11-like [Gossypium hirsutum]
		i0_HQ_K_c19946/f2p2/563	PREDICTED: 40S ribosomal protein S29 [Fragaria vesca subsp. vesca]
		i1_HQ_K_c14280/f2p0/1255	NAC domain protein [Hevea brasiliensis]
		i1_HQ_K_c1296/f13p2/1579	PREDICTED: probable L-ascorbate peroxidase 6, chloroplastic [Arachis ipaensis]
		i1_HQ_K_c76669/f4p3/1254	PREDICTED: annexin D1-like [Sesamum indicum]
		i0_LQ_K_c31827/f1p0/745	PREDICTED: 60S ribosomal protein L18a [Capsicum annuum]
		i1_HQ_K_c69749/f3p0/1413	PREDICTED: WAT1-related protein At2g39510-like [Ipomoea nil]
		i0_LQ_K_c3233/f1p1/723	PREDICTED: NADH dehydrogenase [ubiquinone] 1 beta subcomplex subunit 7 [Citrus sinensis]
		i0_HQ_K_c1929/f2p2/923	PREDICTED: protein GDAP2 homolog [Nelumbo nucifera]
		i0_HQ_K_c12336/f2p0/463	PREDICTED: H/ACA ribonucleoprotein complex subunit 3-like protein isoform X2 [Nicotiana tomentosiformis]
		i0_LQ_K_c7073/f1p2/657	PREDICTED: 40S ribosomal protein S15a-1 [Gossypium raimondii]
		i1_HQ_K_c16769/f33p2/1849	PREDICTED: adenosylhomocysteinase [Ricinus communis]
		i0_HQ_K_c4837/f2p2/816	PREDICTED: proteasome subunit beta type-3-A [Sesamum indicum]
		i2_HQ_K_c98769/f2p0/2247	RecName: Full=3-hydroxy-3-methylglutaryl-coenzyme A reductase; Short=HMG-CoA reductase
		i0_HQ_K_c2159/f2p1/874	PREDICTED: 60S ribosomal protein L13a-4-like [Nicotiana attenuata]
		i0_HQ_K_c16799/f9p0/507	PREDICTED: calmodulin-like protein 5 [Gossypium hirsutum]
		i2_LQ_K_c64501/f1p10/2092	PREDICTED: tubulin alpha chain-like [Phoenix dactylifera]
		i0_LQ_K_c10303/f1p7/641	PREDICTED: 60S ribosomal protein L35 [Populus euphratica]
		i0_LQ_K_c22269/f1p0/579	PREDICTED: 60S ribosomal protein L23a isoform X2 [Glycine max]
		i0_HQ_K_c4862/f2p1/901	PREDICTED: zinc finger A20 and AN1 domain-containing stress-associated protein 8-like isoform X1 [Capsicum annuum]
		i1_HQ_K_c41377/f4p4/1434	PREDICTED: E3 ubiquitin-protein ligase MIEL1 [Ricinus communis]
		i0_HQ_K_c1783/f4p0/771	PREDICTED: 60S ribosomal protein L18-2 [Eucalyptus grandis]
		i0_HQ_K_c16706/f5p0/772	PREDICTED: probable calcium-binding protein CML20 [Daucus carota subsp. sativus]
		i0_HQ_K_c4442/f6p0/989	40S ribosomal protein S6-like isoform X2 [Ananas comosus]
		i0_LQ_K_c27290/f1p0/971	PREDICTED: actin-depolymerizing factor 2 [Populus euphratica]
		i1_HQ_K_c88072/f7p2/1967	PREDICTED: vicianin hydrolase-like [Populus euphratica]
		i2_HQ_K_c174922/f2p1/2397	RecName: Full=3-hydroxy-3-methylglutaryl-coenzyme A reductase; Short=HMG-CoA reductase
		i2_LQ_K_c50516/f1p12/2067	Actin/actin-like conserved site-containing protein [Cynara cardunculus var. scolymus]
		i1_HQ_K_c37184/f2p0/1508	PREDICTED: 60S ribosomal protein L4 [Prunus mume]
		i0_HQ_K_c33831/f4p0/776	PREDICTED: nascent polypeptide-associated complex subunit beta [Theobroma cacao]
		i0_HQ_K_c16736/f11p0/996	PREDICTED: cell number regulator 8 [Theobroma cacao]
		i1_HQ_K_c86724/f12p2/1706	PREDICTED: E3 ubiquitin-protein ligase RGLG2-like [Sesamum indicum]
		i2_LQ_K_c14578/f1p16/2412	elongation factor 1-alpha-like [Dorcoceras hygrometricum]
		i1_LQ_K_c96384/f1p1/1001	PREDICTED: membrane steroid-binding protein 2 [Eucalyptus grandis]
		i0_LQ_K_c25800/f1p0/825	eukaryotic translation initiation factor 5A4 [Populus tremula x Populus alba]
		i0_LQ_K_c12455/f1p2/935	eukaryotic translation initiation factor 5A4 [Camellia sinensis]
		i1_HQ_K_c10568/f2p0/1744	geraniol 10-hydroxylase [Ophiorrhiza pumila]
		i0_HQ_K_c430/f9p0/644	PREDICTED: 60S ribosomal protein L31 [Juglans regia]
		i0_LQ_K_c11340/f1p2/513	PREDICTED: 60S ribosomal protein L28-2-like [Vigna angularis]
		i0_LQ_K_c3432/f1p0/742	PREDICTED: 60S ribosomal protein L23A [Sesamum indicum]
		i1_LQ_K_c54623/f1p2/1494	Adenosine kinase 2 [Theobroma cacao]
		i0_LQ_K_c33675/f15p0/938	PREDICTED: 40S ribosomal protein S9-2-like [Solanum pennellii]
		i1_HQ_K_c87940/f19p1/1220	RecName: Full=40S ribosomal protein SA; AltName: Full=p40
		i1_HQ_K_c67210/f7p0/1453	PREDICTED: fasciclin-like arabinogalactan protein 2 [Jatropha curcas]
		i1_HQ_K_c14641/f4p0/1346	PREDICTED: auxin-responsive protein IAA27 [Vitis vinifera]
		i0_LQ_K_c26565/f1p0/665	Ubiquitin supergroup,Ribosomal protein L40e [Theobroma cacao]
		i0_LQ_K_c36089/f1p0/774	PREDICTED: SKP1-like protein 1B [Solanum tuberosum]
		i1_HQ_K_c32039/f19p2/1969	aspartic proteinase [Camellia sinensis]
		i2_HQ_K_c147703/f57p7/2204	PREDICTED: granule-bound starch synthase 1, chloroplastic/amyloplastic isoform X1 [Nelumbo nucifera]
		i1_LQ_K_c85000/f1p0/1054	Elongation factor 1-delta [Zostera marina]
		i0_LQ_K_c22064/f2p0/478	PREDICTED: DNA-directed RNA polymerases II, IV and V subunit 12 [Beta vulgaris subsp. vulgaris]
		i1_HQ_K_c45489/f2p3/1024	PREDICTED: eukaryotic translation initiation factor 3 subunit K-like isoform X2 [Gossypium hirsutum]
		i0_HQ_K_c33259/f10p0/742	PREDICTED: SKP1-like protein 1B [Solanum tuberosum]
		i1_HQ_K_c88957/f55p1/1464	cysteine protease Cp1 [Actinidia deliciosa]
		i0_LQ_K_c4093/f1p2/423	PREDICTED: ATP synthase subunit d, mitochondrial [Gossypium arboreum]
		i0_HQ_K_c16663/f9p0/859	PREDICTED: 1,2-dihydroxy-3-keto-5-methylthiopentene dioxygenase 2 [Ricinus communis]
		i2_HQ_K_c170955/f65p3/2098	PREDICTED: ruBisCO large subunit-binding protein subunit alpha [Nicotiana sylvestris]
		i0_LQ_K_c13854/f1p0/427	BnaC02g12080D [Brassica napus]
		i1_HQ_K_c67126/f6p0/1664	Homeobox protein, putative isoform 1 [Theobroma cacao]
		i0_HQ_K_c33699/f15p0/670	PREDICTED: 14 kDa proline-rich protein DC2.15 [Fragaria vesca subsp. vesca]
		i0_HQ_K_c1824/f3p0/743	AP-1 complex subunit sigma-2 [Dorcoceras hygrometricum]
		i1_LQ_K_c87142/f49p3/1876	Gamma vacuolar processing enzyme [Theobroma cacao]
		i0_LQ_K_c8131/f1p1/704	PREDICTED: histone H2B [Eucalyptus grandis]
		i0_LQ_K_c28643/f1p1/647	metallothionein type 2 [Ilex paraguariensis]
		i0_LQ_K_c19514/f1p9/844	glycine-rich protein [Oryza sativa Japonica Group]
		i0_HQ_K_c14446/f2p2/745	PREDICTED: sm-like protein LSM7 [Phoenix dactylifera]
		i0_HQ_K_c18493/f2p0/646	PREDICTED: histone H3-like centromeric protein CSE4 [Oryza sativa Japonica Group]
		i1_HQ_K_c51210/f3p1/1263	PREDICTED: putative lactoylglutathione lyase isoform X2 [Vitis vinifera]
		i1_HQ_K_c73830/f2p0/1792	PREDICTED: serine hydroxymethyltransferase 4 [Sesamum indicum]
		i0_HQ_K_c987/f3p10/631	60S ribosomal protein L26-1 [Morus notabilis]
		i0_LQ_K_c10490/f1p5/663	PREDICTED: 60S ribosomal protein L27a-3 [Vitis vinifera]
		i0_LQ_K_c8786/f1p0/721	PREDICTED: probable glutathione peroxidase 5 [Nicotiana tabacum]
		i1_LQ_K_c48484/f1p0/1120	PREDICTED: WUSCHEL-related homeobox 8 [Daucus carota subsp. sativus]
		i0_LQ_K_c10024/f1p0/920	PREDICTED: 60S ribosomal protein L10a-like [Elaeis guineensis]
		i0_LQ_K_c1185/f5p0/535	PREDICTED: 40S ribosomal protein S28-1 [Cucumis sativus]
		i1_HQ_K_c68014/f4p1/1159	PREDICTED: 60S ribosomal protein L7a-1 [Nelumbo nucifera]
		i1_HQ_K_c87144/f32p1/1459	PREDICTED: thiamine thiazole synthase, chloroplastic-like [Juglans regia]
		i1_LQ_K_c78317/f1p1/1813	PREDICTED: 26S protease regulatory subunit 7A [Juglans regia]
		i1_LQ_K_c9704/f1p2/1188	RecName: Full=40S ribosomal protein S3a; AltName: Full=CYC07 protein
		i0_HQ_K_c1454/f3p0/616	Ubiquitin supergroup,Ribosomal protein L40e [Theobroma cacao]
		i1_LQ_K_c88969/f18p8/1730	PREDICTED: aspartic proteinase-like isoform X3 [Capsicum annuum]
		i0_HQ_K_c2375/f2p0/737	PREDICTED: NADH dehydrogenase [ubiquinone] iron-sulfur protein 6, mitochondrial-like [Sesamum indicum]
		i1_HQ_K_c68334/f2p0/1184	14-3-3 protein [Vitis vinifera]
		i0_HQ_K_c33290/f12p0/873	PREDICTED: nascent polypeptide-associated complex subunit alpha-like protein 1 [Vitis vinifera]
		i1_HQ_K_c24230/f2p2/1196	KOW domain-containing protein/eIF-5a domain-containing protein [Cephalotus follicularis]
		i0_HQ_K_c11447/f3p0/972	PREDICTED: malignant T-cell-amplified sequence 1 homolog [Vitis vinifera]
		i2_LQ_K_c133354/f1p28/2695	Peroxidase 42 precursor family protein [Populus trichocarpa]
		i0_LQ_K_c7754/f1p5/415	PREDICTED: probable 26S proteasome complex subunit sem1-1 [Jatropha curcas]
		i0_HQ_K_c1520/f4p3/770	PREDICTED: basic transcription factor 3 [Theobroma cacao]
		i0_LQ_K_c20389/f1p15/955	PREDICTED: remorin isoform X2 [Erythranthe guttata]
		i1_LQ_K_c47269/f1p0/1083	PREDICTED: 60S ribosomal protein L13-1 [Ricinus communis]
		i1_HQ_K_c62685/f3p32/1094	PREDICTED: 14-3-3-like protein D isoform X2 [Nelumbo nucifera]
		i2_LQ_K_c23603/f1p3/2287	granule-bound starch synthase [Castanea mollissima]
		i0_HQ_K_c18444/f2p0/700	PREDICTED: 60S ribosomal protein L27a-3 [Tarenaya hassleriana]
		i1_LQ_K_c78885/f1p3/1632	PREDICTED: uncharacterized protein LOC100247241 [Vitis vinifera]
		i0_LQ_K_c2281/f2p5/553	DAD1 [Petunia x hybrida]
		i1_HQ_K_c80969/f6p1/1038	PREDICTED: 60S ribosomal protein L7a-1 [Nelumbo nucifera]
		i1_HQ_K_c4462/f3p0/1312	cinnamoyl-CoA reductase [Vaccinium corymbosum]
		i0_HQ_K_c24285/f3p0/607	PREDICTED: protein transport protein Sec61 subunit beta [Nelumbo nucifera]
		i1_HQ_K_c11525/f2p7/1688	ADH2 [Actinidia deliciosa]
		i0_LQ_K_c25183/f1p6/935	PREDICTED: 40S ribosomal protein S5 [Eucalyptus grandis]
		i1_HQ_K_c67458/f9p3/1223	Longin domain-containing protein [Cynara cardunculus var. scolymus]
		i1_LQ_K_c91235/f1p3/1144	Gp_dh_N domain-containing protein/Gp_dh_C domain-containing protein [Cephalotus follicularis]
		i1_LQ_K_c74633/f1p1/1255	PREDICTED: probable mediator of RNA polymerase II transcription subunit 36b [Solanum pennellii]
		i0_HQ_K_c11378/f5p7/766	KOW domain-containing protein/eIF-5a domain-containing protein [Cephalotus follicularis]
		i0_LQ_K_c20964/f1p0/624	PREDICTED: 40S ribosomal protein S20-2 [Sesamum indicum]
		i0_HQ_K_c2176/f2p0/734	PREDICTED: 60S ribosomal protein L35 [Theobroma cacao]
		i1_LQ_K_c44201/f1p5/1633	PREDICTED: glyceraldehyde-3-phosphate dehydrogenase, cytosolic [Eucalyptus grandis]
		i1_LQ_K_c75014/f1p0/1315	PREDICTED: NDR1/HIN1-like protein 12 [Pyrus x bretschneideri]
		i0_HQ_K_c2540/f2p1/448	PREDICTED: 40S ribosomal protein S28-1 [Cucumis melo]
		i1_HQ_K_c12880/f3p1/1300	PREDICTED: putative lactoylglutathione lyase isoform X2 [Vitis vinifera]
		i1_HQ_K_c88017/f29p0/1713	enolase [Camellia sinensis]
		i1_HQ_K_c9952/f3p25/1612	PREDICTED: 36.4 kDa proline-rich protein-like [Gossypium hirsutum]
		i1_HQ_K_c9798/f5p6/1201	PREDICTED: glutathione S-transferase [Eucalyptus grandis]
		i1_HQ_K_c49824/f19p0/1100	PREDICTED: proteasome subunit beta type-5 [Vitis vinifera]
		i0_LQ_K_c24914/f1p6/996	thaumatin-like protein [Actinidia chinensis]
		i0_LQ_K_c18133/f2p0/401	PREDICTED: mitochondrial import receptor subunit TOM6 homolog isoform X2 [Capsicum annuum]
		i1_LQ_K_c74113/f1p1/1283	PREDICTED: 40S ribosomal protein SA [Cucumis sativus]
		i0_HQ_K_c1492/f4p2/991	PREDICTED: NADH dehydrogenase [ubiquinone] iron-sulfur protein 8, mitochondrial [Ipomoea nil]
		i0_LQ_K_c28139/f1p0/964	PREDICTED: ADP-ribosylation factor 2 isoform X1 [Nicotiana tomentosiformis]
		i0_LQ_K_c32947/f1p1/633	PREDICTED: 40S ribosomal protein S24-1-like [Pyrus x bretschneideri]
		i0_LQ_K_c24675/f1p5/958	PREDICTED: classical arabinogalactan protein 9 [Malus domestica]
		i1_LQ_K_c96583/f1p0/1010	PREDICTED: 60S ribosomal protein L10a-1 [Vitis vinifera]
		i1_HQ_K_c67814/f9p7/1411	PREDICTED: UV-B-induced protein At3g17800, chloroplastic isoform X1 [Daucus carota subsp. sativus]
		i1_HQ_K_c2223/f2p3/1368	PREDICTED: probable 6-phosphogluconolactonase 4, chloroplastic isoform X2 [Nelumbo nucifera]
		i1_HQ_K_c1902/f5p1/1379	cytosolic malate dehydrogenase [Camellia sinensis]
		i0_LQ_K_c6920/f1p0/929	60s ribosomal protein l18a, partial [Nicotiana attenuata]
		i1_LQ_K_c30495/f1p4/1048	PREDICTED: pollen-specific leucine-rich repeat extensin-like protein 1 [Nicotiana tomentosiformis]
		i1_LQ_K_c23592/f1p0/1159	PREDICTED: mitochondrial import inner membrane translocase subunit TIM17-2-like [Sesamum indicum]
		i0_LQ_K_c22299/f1p6/692	PREDICTED: glucan endo-1,3-beta-glucosidase, basic vacuolar isoform-like [Juglans regia]
		i0_LQ_K_c2413/f3p0/928	PREDICTED: ER membrane protein complex subunit 8/9 homolog [Vitis vinifera]
		i0_HQ_K_c11982/f3p0/727	PREDICTED: 40S ribosomal protein S25-2-like [Nelumbo nucifera]
		i1_HQ_K_c62239/f5p4/1108	PREDICTED: 40S ribosomal protein S4-3 [Jatropha curcas]
		i1_HQ_K_c34021/f8p1/1545	PREDICTED: probable pectate lyase 5 [Populus euphratica]
		i1_LQ_K_c24163/f1p0/1340	PREDICTED: fasciclin-like arabinogalactan protein 2 [Jatropha curcas]
		i1_HQ_K_c2428/f13p6/1335	PREDICTED: 1-aminocyclopropane-1-carboxylate oxidase homolog 4 isoform X1 [Vitis vinifera]
		i2_LQ_K_c153158/f1p9/2145	GDP-L-galactose phosphorylase [Actinidia deliciosa]
		i0_HQ_K_c17969/f3p0/882	PREDICTED: trafficking protein particle complex subunit 3 [Fragaria vesca subsp. vesca]
		i0_LQ_K_c33390/f1p60/626	PREDICTED: 60S acidic ribosomal protein P3-like [Nelumbo nucifera]
		i0_HQ_K_c4852/f2p1/722	PREDICTED: glycine-rich RNA-binding protein 4, mitochondrial [Vitis vinifera]
		i1_HQ_K_c88155/f36p2/1682	PREDICTED: nucleosome assembly protein 1;4 [Vitis vinifera]
		i1_HQ_K_c18296/f7p2/1469	Adenosine kinase 2 [Theobroma cacao]
		i0_HQ_K_c2425/f3p0/565	PREDICTED: acyl-CoA-binding protein [Erythranthe guttata]
		i1_HQ_K_c18139/f3p0/1404	PREDICTED: cathepsin B-like [Populus euphratica]
		i0_LQ_K_c12795/f2p0/624	PREDICTED: 10 kDa chaperonin-like [Musa acuminata subsp. malaccensis]
		i1_HQ_K_c14830/f3p0/1606	PREDICTED: 60S ribosomal protein L4-like [Nelumbo nucifera]
		i1_LQ_K_c15698/f1p1/1021	PREDICTED: 60S ribosomal protein L10a [Phoenix dactylifera]
		i4_LQ_K_c23562/f1p0/4678	#N/A
		i1_LQ_K_c65468/f1p2/1029	vesicle-associated membrane protein [Solanum lycopersicum]
		i0_LQ_K_c13935/f1p61/883	PREDICTED: 40S ribosomal protein S9-2-like [Solanum pennellii]
		i2_LQ_K_c143157/f1p8/2191	PDC1 [Actinidia deliciosa]
		i0_LQ_K_c5036/f2p3/733	acyl carrier protein [Camellia oleifera]
		i1_HQ_K_c88453/f12p0/1065	PREDICTED: proteasome subunit alpha type-7 [Vitis vinifera]
		i0_LQ_K_c16483/f1p0/350	PREDICTED: 40S ribosomal protein S29 [Fragaria vesca subsp. vesca]
		i1_HQ_K_c10405/f6p3/1596	PREDICTED: S-adenosylmethionine synthase 2 [Ziziphus jujuba]
		i1_HQ_K_c87648/f3p14/1211	PREDICTED: auxin-responsive protein IAA4-like [Daucus carota subsp. sativus]
		i0_HQ_K_c33681/f16p2/808	PREDICTED: peptidyl-prolyl cis-trans isomerase [Ricinus communis]
		i1_LQ_K_c85951/f1p1/1017	PREDICTED: defensin-like protein 1 [Juglans regia]
		i1_LQ_K_c48014/f1p1/1104	PREDICTED: 40S ribosomal protein S4-like [Ziziphus jujuba]
		i1_LQ_K_c6618/f1p3/1549	PREDICTED: FAM10 family protein At4g22670 isoform X3 [Ipomoea nil]
		i1_LQ_K_c23379/f1p2/1986	PREDICTED: elongation factor 1-alpha [Juglans regia]
		i0_LQ_K_c22838/f1p0/644	Ribosomal protein S8, partial [Cynara cardunculus var. scolymus]
		i1_HQ_K_c1557/f3p8/1760	Hyaluronan/mRNA-binding protein [Cynara cardunculus var. scolymus]
		i0_HQ_K_c4239/f2p17/643	PREDICTED: 60S acidic ribosomal protein P1-like isoform X1 [Ipomoea nil]
		i1_LQ_K_c96704/f1p0/1003	PREDICTED: lachrymatory-factor synthase-like [Sesamum indicum]
		i0_LQ_K_c21592/f1p0/697	PREDICTED: cyclin-B1-2 [Cucumis melo]
		i1_LQ_K_c16573/f1p4/1085	PREDICTED: membrane steroid-binding protein 1-like [Pyrus x bretschneideri]
		i2_HQ_K_c97865/f20p4/2398	PREDICTED: RNA polymerase II degradation factor 1 [Vitis vinifera]
		i1_HQ_K_c81200/f4p1/1083	PREDICTED: reticulon-like protein B2 [Vitis vinifera]
		i0_LQ_K_c15888/f1p0/954	Ubiquitin-conjugating enzyme E2 2 [Anthurium amnicola]
		i2_LQ_K_c160242/f1p1/2129	PREDICTED: 60S ribosomal protein L4-like [Nelumbo nucifera]
		i0_LQ_K_c27904/f1p2/655	PREDICTED: nucleolar transcription factor 1-B-like [Gossypium raimondii]
		i0_LQ_K_c10233/f1p0/913	zinc finger protein [Camellia sinensis]
		i1_LQ_K_c27598/f1p82/1309	60S ribosomal protein L3-like [Solanum tuberosum]
		i0_LQ_K_c1335/f7p0/740	PREDICTED: probable histone H2B.3 [Lupinus angustifolius]
		i0_HQ_K_c2527/f5p3/919	PREDICTED: LIM domain-containing protein WLIM1 [Vitis vinifera]
		i0_LQ_K_c19911/f1p0/687	PREDICTED: ubiquitin-fold modifier-conjugating enzyme 1 [Nelumbo nucifera]
		i1_LQ_K_c15858/f1p1/1111	PREDICTED: ras-related protein RABB1b isoform X2 [Nelumbo nucifera]
		i1_HQ_K_c51164/f3p0/1754	Homeobox protein, putative isoform 1 [Theobroma cacao]
		i0_LQ_K_c7429/f1p4/564	Complex1_LYR_2 domain-containing protein [Cephalotus follicularis]
		i2_LQ_K_c56314/f1p27/2220	peroxidase [Camellia oleifera]
		i0_LQ_K_c28120/f1p2/695	PREDICTED: 60S ribosomal protein L14-2 [Ipomoea nil]
		i3_LQ_K_c13913/f1p0/3080	#N/A
		i0_HQ_K_c5101/f3p0/934	PREDICTED: remorin-like isoform X1 [Juglans regia]
		i1_HQ_K_c81439/f3p2/1067	Elongation factor 1-delta [Zostera marina]
		i0_LQ_K_c23923/f1p0/873	PREDICTED: eukaryotic translation initiation factor-like [Nelumbo nucifera]
		i0_LQ_K_c4812/f1p5/634	PREDICTED: thioredoxin-like protein CXXS1 [Jatropha curcas]
		i0_HQ_K_c10536/f2p0/953	Polyketide cyclase/dehydrase [Cynara cardunculus var. scolymus]
		i1_LQ_K_c70127/f1p0/1288	PREDICTED: proteasome subunit alpha type-6-like isoform X2 [Musa acuminata subsp. malaccensis]
		i1_HQ_K_c32678/f2p2/1122	Xylan biosynthesis protein IRX15/IRX15L [Corchorus olitorius]
		i2_HQ_K_c148088/f20p4/2083	PREDICTED: protein IWS1 homolog 1 isoform X1 [Vitis vinifera]
		i0_LQ_K_c6614/f1p3/828	PREDICTED: 60S ribosomal protein L14-2 [Ipomoea nil]
		i0_HQ_K_c1795/f3p0/564	PREDICTED: mediator of RNA polymerase II transcription subunit 15a [Ricinus communis]
		i0_LQ_K_c10042/f1p4/525	PREDICTED: NADH dehydrogenase [ubiquinone] 1 alpha subcomplex subunit 2-like [Juglans regia]
		i1_HQ_K_c56727/f3p1/1473	chitodextrinase [Eucommia ulmoides]
		i0_LQ_K_c2131/f3p0/862	PREDICTED: esterase CG5412-like [Ipomoea nil]
		i1_LQ_K_c46897/f1p74/1113	PREDICTED: GTP-binding nuclear protein Ran-3 [Nelumbo nucifera]
		i0_LQ_K_c6522/f1p0/948	xyloglucan endotransglucosylase/hydrolase 8 [Actinidia deliciosa]
		i0_LQ_K_c4821/f1p2/599	PREDICTED: probable small nuclear ribonucleoprotein F [Daucus carota subsp. sativus]
		i1_LQ_K_c34337/f1p1/1623	elongation factor 1-gamma [Oryza sativa Japonica Group]
		i2_LQ_K_c60626/f1p4/1986	PREDICTED: common plant regulatory factor 1 isoform X2 [Vitis vinifera]
		i1_LQ_K_c41730/f1p7/1513	PREDICTED: protein DJ-1 homolog D [Eucalyptus grandis]
		i0_LQ_K_c1048/f4p5/728	PREDICTED: glycine cleavage system H protein 2, mitochondrial [Vitis vinifera]
		i1_HQ_K_c14218/f3p1/1559	PREDICTED: probable fructose-bisphosphate aldolase 3, chloroplastic [Sesamum indicum]
		i0_HQ_K_c9215/f3p0/690	PREDICTED: 60S ribosomal protein L32-1 [Populus euphratica]
		i1_LQ_K_c88822/f1p0/1805	PREDICTED: common plant regulatory factor 1 isoform X2 [Vitis vinifera]
		i0_LQ_K_c34720/f3p6/796	PREDICTED: 60S ribosomal protein L17-2-like [Lupinus angustifolius]
		i0_HQ_K_c1597/f4p1/842	chitodextrinase [Eucommia ulmoides]
		i0_HQ_K_c2422/f6p14/701	PREDICTED: NADH dehydrogenase [ubiquinone] 1 beta subcomplex subunit 8, mitochondrial [Pyrus x bretschneideri]
		i0_HQ_K_c1757/f2p2/640	PREDICTED: abscisic stress-ripening protein 1-like [Juglans regia]
		i0_LQ_K_c12050/f1p7/685	PREDICTED: NADH dehydrogenase [ubiquinone] 1 alpha subcomplex subunit 13-B [Elaeis guineensis]
		i1_LQ_K_c83919/f1p14/1074	PREDICTED: 40S ribosomal protein SA [Cucumis sativus]
		i1_HQ_K_c18004/f5p1/1531	PREDICTED: calreticulin [Sesamum indicum]
		i0_HQ_K_c33277/f12p0/920	PREDICTED: 60S ribosomal protein L10a [Phoenix dactylifera]
		i1_LQ_K_c65124/f1p0/1028	PREDICTED: peptidyl-prolyl cis-trans isomerase FKBP20-1 [Sesamum indicum]
		i1_HQ_K_c87931/f7p0/1118	PREDICTED: urease accessory protein G [Juglans regia]
		i0_LQ_K_c25006/f1p1/454	PREDICTED: 40S ribosomal protein S9-2 [Nelumbo nucifera]
		i0_LQ_K_c6851/f1p0/993	BnaC02g13240D [Brassica napus]
		i1_LQ_K_c42216/f1p0/1360	PREDICTED: 60S ribosomal protein L4-1-like [Ipomoea nil]
		i1_LQ_K_c27245/f1p2/1226	PREDICTED: 20 kDa chaperonin, chloroplastic [Jatropha curcas]
		i1_HQ_K_c69881/f2p0/1629	PREDICTED: plasminogen activator inhibitor 1 RNA-binding protein-like isoform X2 [Ipomoea nil]
		i2_LQ_K_c109783/f1p0/2438	#N/A
		i0_HQ_K_c1936/f3p6/739	PREDICTED: 60S ribosomal protein L17-2-like [Juglans regia]
		i2_HQ_K_c97939/f35p5/2401	PREDICTED: MACPF domain-containing protein At4g24290-like [Sesamum indicum]
		i0_LQ_K_c14943/f1p0/371	PREDICTED: SKP1-like protein 1B [Nelumbo nucifera]
		i0_LQ_K_c18898/f1p6/873	PREDICTED: iron-sulfur cluster assembly protein 1-like [Cucumis melo]
		i0_HQ_K_c450/f11p0/805	PREDICTED: glycine-rich RNA-binding protein 4, mitochondrial [Vitis vinifera]
		i1_LQ_K_c40548/f1p1/1479	PREDICTED: 36.4 kDa proline-rich protein-like [Gossypium hirsutum]
		i1_HQ_K_c32023/f32p3/1991	EamA domain-containing protein/TPT domain-containing protein [Cephalotus follicularis]
		i0_LQ_K_c9402/f1p0/695	DNA-directed RNA polymerase, RBP11-like protein [Corchorus olitorius]
		i2_LQ_K_c118606/f1p2/2042	#N/A
		i0_HQ_K_c23334/f2p7/801	PREDICTED: peptidyl-prolyl cis-trans isomerase CYP19-3 [Vitis vinifera]
		i1_LQ_K_c72341/f1p3/1342	PREDICTED: annexin D1-like [Sesamum indicum]
		i2_LQ_K_c111271/f1p7/2010	#N/A
		i1_LQ_K_c96184/f1p1/999	PREDICTED: cell number regulator 8-like [Gossypium raimondii]
		i1_LQ_K_c42246/f1p1/1334	PREDICTED: spermidine synthase [Theobroma cacao]
		i0_HQ_K_c1928/f2p6/710	Ribosomal protein S8, partial [Cynara cardunculus var. scolymus]
		i0_HQ_K_c5720/f3p0/639	PREDICTED: peroxiredoxin-2B [Sesamum indicum]
		i2_HQ_K_c8582/f5p6/2287	PREDICTED: ruBisCO large subunit-binding protein subunit beta, chloroplastic [Vitis vinifera]
		i0_LQ_K_c2144/f2p9/666	PREDICTED: probable WRKY transcription factor 75 [Juglans regia]
		i2_HQ_K_c172536/f6p1/2071	PREDICTED: ketol-acid reductoisomerase, chloroplastic [Juglans regia]
		i0_LQ_K_c22910/f1p0/742	PREDICTED: 14 kDa zinc-binding protein [Juglans regia]
		i1_HQ_K_c67791/f23p2/1102	Rossmann-like alpha/beta/alpha sandwich fold [Cynara cardunculus var. scolymus]
		i1_HQ_K_c11259/f5p0/1215	Nuclear encoded CLP protease 5 isoform 3 [Theobroma cacao]
		i0_LQ_K_c10409/f1p2/950	PREDICTED: 60S ribosomal protein L7a-1 [Nelumbo nucifera]
		i1_LQ_K_c4510/f1p1/1166	Myb domain protein 48 isoform 1 [Theobroma cacao]
		i0_LQ_K_c8503/f1p0/611	PREDICTED: probable prefoldin subunit 4 [Vigna radiata var. radiata]
		i0_LQ_K_c19985/f1p2/965	PREDICTED: V-type proton ATPase 16 kDa proteolipid subunit [Eucalyptus grandis]
		i0_HQ_K_c5648/f7p2/873	PREDICTED: 36.4 kDa proline-rich protein [Vitis vinifera]
		i1_LQ_K_c82715/f1p0/1079	putative tonoplast intrinsic protein [Camellia sinensis]
		i1_HQ_K_c81138/f4p0/1048	Proteasome subunit alpha type 3 family protein [Populus trichocarpa]
		i0_HQ_K_c29931/f3p2/736	PREDICTED: probable calcium-binding protein CML20 [Pyrus x bretschneideri]
		i0_LQ_K_c27250/f1p0/740	40S ribosomal protein s21e [Camellia sinensis]
		i2_HQ_K_c36283/f3p26/2396	PREDICTED: peroxidase 42 [Ricinus communis]
		i0_HQ_K_c33678/f10p0/897	PREDICTED: V-type proton ATPase 16 kDa proteolipid subunit-like [Pyrus x bretschneideri]
		i0_LQ_K_c8318/f1p0/993	chloroplast Cu/ZnSOD [Gossypium hirsutum]
		i0_LQ_K_c21163/f1p1/974	PREDICTED: 60S ribosomal protein L17-2-like [Juglans regia]
		i1_LQ_K_c23821/f1p2/1919	PREDICTED: aspartic proteinase A1-like [Daucus carota subsp. sativus]
		i1_LQ_K_c83570/f1p5/1114	20S proteasome alpha subunit C1 isoform 1 [Theobroma cacao]
		i1_HQ_K_c87204/f10p2/1148	PREDICTED: proteasome subunit alpha type-1-B [Sesamum indicum]
		i0_HQ_K_c1614/f3p0/419	PREDICTED: 40S ribosomal protein S29-like [Ziziphus jujuba]
		i0_LQ_K_c13366/f1p27/587	PREDICTED: 60S ribosomal protein L36-2-like [Nicotiana attenuata]
		i1_HQ_K_c67685/f16p1/1619	PREDICTED: S-adenosylmethionine synthase 2 [Ziziphus jujuba]
		i0_LQ_K_c10925/f1p0/597	metallothionein type 2 [Ilex paraguariensis]
		i1_LQ_K_c57312/f1p31/1468	RD22-like protein [Camellia sinensis]
		i0_LQ_K_c22253/f1p1/871	PREDICTED: universal stress protein A-like protein [Solanum tuberosum]
		i2_LQ_K_c121300/f4p11/2204	#N/A
		i1_LQ_K_c95321/f1p1/1010	PREDICTED: nascent polypeptide-associated complex subunit alpha-like protein 2 [Nicotiana tabacum]
		i1_HQ_K_c2230/f9p9/1527	PREDICTED: ADP,ATP carrier protein, mitochondrial-like [Ipomoea nil]
		i0_LQ_K_c22574/f1p1/922	PREDICTED: protein NUCLEAR FUSION DEFECTIVE 2 [Vitis vinifera]
		i2_LQ_K_c94945/f1p1/2044	PREDICTED: ATP synthase subunit gamma, mitochondrial-like [Nelumbo nucifera]
		i1_HQ_K_c87848/f10p3/1141	14-3-3-like protein [Gossypium raimondii]
		i1_LQ_K_c2814/f1p0/1311	PREDICTED: probable leucine-rich repeat receptor-like protein kinase At1g35710 [Vitis vinifera]
		i0_LQ_K_c13119/f1p11/823	PREDICTED: 60S ribosomal protein L23a [Eucalyptus grandis]
		i0_HQ_K_c1053/f4p1/727	Histone H2A [Cajanus cajan]
		i1_LQ_K_c15244/f1p39/1037	PREDICTED: 60S ribosomal protein L8 [Daucus carota subsp. sativus]
		i2_HQ_K_c170927/f73p6/2213	PREDICTED: ruBisCO large subunit-binding protein subunit beta, chloroplastic [Vitis vinifera]
		i0_LQ_K_c3742/f1p0/772	60s ribosomal protein l14-1, partial [Nicotiana attenuata]
		i2_HQ_K_c113823/f3p1/2137	GDP-L-galactose phosphorylase [Actinidia deliciosa]
		i0_HQ_K_c995/f8p0/626	PREDICTED: thioredoxin H2 [Solanum tuberosum]
		i0_HQ_K_c3708/f2p2/534	PREDICTED: mitochondrial import receptor subunit TOM9-2 [Ipomoea nil]
		i0_HQ_K_c1775/f4p5/464	PREDICTED: thionin-like protein 2 [Vitis vinifera]
		i0_HQ_K_c1330/f4p0/611	PREDICTED: NADH dehydrogenase [ubiquinone] 1 alpha subcomplex subunit 8-B [Eucalyptus grandis]
		i1_HQ_K_c1708/f4p0/1741	PREDICTED: acetolactate synthase small subunit 1, chloroplastic-like [Solanum tuberosum]
		i1_LQ_K_c35078/f1p0/1231	PREDICTED: ferritin-2, chloroplastic [Nicotiana sylvestris]
		i0_LQ_K_c23217/f1p0/874	PREDICTED: ESCRT-related protein CHMP1B [Arachis ipaensis]
		i0_HQ_K_c1860/f3p0/650	PREDICTED: 60S ribosomal protein L15-like [Populus euphratica]
		i2_LQ_K_c26894/f1p0/2777	PREDICTED: 1,4-alpha-glucan-branching enzyme 1, chloroplastic/amyloplastic isoform X1 [Vitis vinifera]
		i0_HQ_K_c6720/f2p2/717	Calreticulin [Cynara cardunculus var. scolymus]
		i0_HQ_K_c2574/f7p26/929	ATP synthase subunit delta' [Morus notabilis]
		i1_LQ_K_c46517/f1p0/1424	Band 7 protein [Corchorus capsularis]
		i1_LQ_K_c66179/f1p2/1079	PREDICTED: cold-regulated 413 plasma membrane protein 2 [Juglans regia]
		i0_LQ_K_c3709/f1p0/629	PREDICTED: DNA-directed RNA polymerases I, II, and III subunit RPABC5 [Sesamum indicum]
		i2_HQ_K_c34235/f21p0/2593	PREDICTED: cellulose synthase-like protein G3 isoform X3 [Vitis vinifera]
		i1_HQ_K_c91656/f3p0/1186	PREDICTED: 2-Cys peroxiredoxin isoform X1 [Vitis vinifera]
		i1_HQ_K_c81977/f2p0/1069	dehydroascorbate reductase 1 [Actinidia deliciosa]
		i1_LQ_K_c79643/f1p12/1873	PREDICTED: actin-7 [Theobroma cacao]
		i1_LQ_K_c9954/f1p0/1579	caffeic acid O-methyltransferase [Camellia sinensis]
		i1_LQ_K_c86583/f1p3/1080	PREDICTED: ATP synthase subunit O, mitochondrial-like [Sesamum indicum]
		i0_LQ_K_c35473/f1p0/777	60S ribosomal protein L32-1 [Morus notabilis]
		i1_LQ_K_c30433/f1p8/1026	PREDICTED: 60S ribosomal protein L8 [Daucus carota subsp. sativus]
		i0_LQ_K_c29017/f1p2/392	oligosaccaryltransferase [Medicago truncatula]
		i0_LQ_K_c11654/f1p0/703	PREDICTED: gibberellin-regulated protein 4-like [Gossypium hirsutum]
		i0_LQ_K_c35386/f1p0/770	PREDICTED: signal peptidase complex subunit 3B [Vitis vinifera]
		i0_HQ_K_c7631/f2p3/598	PREDICTED: 60S ribosomal protein L36-2-like [Nicotiana attenuata]
		i1_HQ_K_c10173/f4p1/1216	PREDICTED: gamma-interferon-inducible lysosomal thiol reductase isoform X4 [Vitis vinifera]
		i0_LQ_K_c24313/f1p0/836	PREDICTED: ubiquitin-conjugating enzyme E2 27 [Cucumis melo]
		i1_LQ_K_c30055/f1p0/1072	PREDICTED: serine/arginine-rich splicing factor SC35-like [Ziziphus jujuba]
		i1_HQ_K_c67568/f3p0/1134	S-like ribonuclease [Camellia sinensis]
		i0_LQ_K_c12541/f1p0/714	PREDICTED: 40S ribosomal protein S20-2 [Gossypium raimondii]
		i0_LQ_K_c24725/f1p0/676	40S ribosomal protein S28 [Morus notabilis]
		i1_LQ_K_c15402/f1p1/1036	PREDICTED: NADH dehydrogenase [ubiquinone] iron-sulfur protein 8, mitochondrial [Ipomoea nil]
		i1_LQ_K_c14577/f2p1/1576	8-hydroxygeraniol oxidoreductase [Catharanthus roseus]
		i1_LQ_K_c96295/f1p1/1009	PREDICTED: auxin-responsive protein IAA14 [Vitis vinifera]
		i1_LQ_K_c87833/f1p0/1574	PREDICTED: 36.4 kDa proline-rich protein-like isoform X2 [Gossypium raimondii]
		i2_LQ_K_c30408/f1p11/2677	Gp_dh_N domain-containing protein/Gp_dh_C domain-containing protein [Cephalotus follicularis]
		i1_LQ_K_c64918/f1p1/1025	PREDICTED: ubiquitin-conjugating enzyme E2 variant 1D [Sesamum indicum]
		i1_LQ_K_c43627/f1p0/1190	Zinc finger, GATA-type [Cynara cardunculus var. scolymus]
		i0_HQ_K_c16869/f2p0/920	PREDICTED: zinc finger A20 and AN1 domain-containing stress-associated protein 8 [Vitis vinifera]
		i0_LQ_K_c33341/f3p0/570	PREDICTED: dolichyl-diphosphooligosaccharide--protein glycosyltransferase subunit DAD1 [Theobroma cacao]
		i0_HQ_K_c34512/f3p0/688	PREDICTED: 40S ribosomal protein S16-like [Ziziphus jujuba]
		i1_LQ_K_c21748/f1p4/1184	PREDICTED: 14-3-3 protein 7 [Jatropha curcas]
		i0_LQ_K_c4206/f1p23/836	PREDICTED: peptidyl-prolyl cis-trans isomerase FKBP20-1 isoform X2 [Nelumbo nucifera]
		i1_HQ_K_c80490/f9p0/1092	PREDICTED: LOW QUALITY PROTEIN: 40S ribosomal protein S6-like [Cucumis melo]
		i1_LQ_K_c86043/f1p0/1059	PREDICTED: REF/SRPP-like protein At1g67360 [Sesamum indicum]
		i0_HQ_K_c5010/f3p0/587	PREDICTED: 60S ribosomal protein L31 [Juglans regia]
		i1_LQ_K_c3274/f1p1/1857	ATP sulfurylase [Camellia sinensis]
		i1_HQ_K_c45654/f2p0/1099	PREDICTED: eukaryotic translation initiation factor 2 subunit beta-like [Nicotiana tomentosiformis]
		i0_LQ_K_c12730/f1p0/488	PREDICTED: DNA-directed RNA polymerases II, IV and V subunit 12 [Sesamum indicum]
		i1_LQ_K_c82450/f1p63/1013	PREDICTED: 60S ribosomal protein L17-2-like [Juglans regia]
		i0_LQ_K_c28407/f1p31/986	PREDICTED: ras-related protein RABE1c [Ziziphus jujuba]
		i1_HQ_K_c39775/f3p0/1418	NAC domain protein [Hevea brasiliensis]
		i0_LQ_K_c7831/f1p0/712	ubiquinol-cytochrome C reductase complex [Camellia sinensis]
		i1_LQ_K_c96311/f1p1/1011	PREDICTED: 40S ribosomal protein S4-3 [Jatropha curcas]
		i1_HQ_K_c87920/f11p7/1943	PREDICTED: proline--tRNA ligase, cytoplasmic-like [Nelumbo nucifera]
		i0_HQ_K_c25509/f2p0/843	PREDICTED: prostatic spermine-binding protein [Vitis vinifera]
		i2_HQ_K_c147398/f13p6/2511	EIN3-like protein EIL2 [Actinidia chinensis]
		i0_LQ_K_c1841/f2p0/642	Ribosomal protein L22/L17 [Corchorus capsularis]
		i1_LQ_K_c58976/f1p0/1357	bZIP transcription factor family protein 12 [Camellia sinensis]
		i0_HQ_K_c2698/f2p3/599	Ubiquitin supergroup,Ribosomal protein L40e [Theobroma cacao]
		i1_HQ_K_c87359/f2p3/1405	chitodextrinase [Eucommia ulmoides]
		i1_LQ_K_c34335/f1p0/1317	anthocyanidin reductase [Camellia sinensis]
		i0_LQ_K_c27739/f1p0/649	Ribosomal_S25 domain-containing protein [Cephalotus follicularis]
		i0_LQ_K_c9536/f1p2/648	PREDICTED: cytochrome c oxidase subunit 6b-2 [Cucumis melo]
		i1_LQ_K_c15222/f2p0/1162	14-3-3 protein [Vitis vinifera]
		i0_LQ_K_c26207/f1p4/617	PREDICTED: U6 snRNA-associated Sm-like protein LSm3 [Populus euphratica]
		i1_LQ_K_c10979/f1p3/1324	Peroxidase 63 precursor, putative [Ricinus communis]
		i0_LQ_K_c28355/f1p2/956	PREDICTED: putative H/ACA ribonucleoprotein complex subunit 1-like protein 1 [Cicer arietinum]
		i1_HQ_K_c18009/f5p2/1376	PREDICTED: malate dehydrogenase, mitochondrial-like [Nelumbo nucifera]
		i0_LQ_K_c8618/f1p0/764	Nucleic acid-binding, OB-fold [Cynara cardunculus var. scolymus]
		i0_LQ_K_c7520/f1p1/837	PREDICTED: 60S ribosomal protein L27a-3 [Tarenaya hassleriana]
		i1_HQ_K_c1716/f6p0/1287	caffeic acid O-methyltransferase [Camellia sinensis]
		i1_LQ_K_c47215/f1p6/1102	PREDICTED: HMG1/2-like protein [Nelumbo nucifera]
		i2_LQ_K_c157088/f1p14/2198	#N/A
		i0_HQ_K_c8649/f4p3/677	Histone H2A [Cajanus cajan]
		i0_LQ_K_c5910/f1p0/904	Pribosyltran domain-containing protein [Cephalotus follicularis]
		i0_LQ_K_c29225/f1p0/975	PREDICTED: osmotin-like protein [Theobroma cacao]
		i1_HQ_K_c94940/f8p0/1870	3-deoxy-D-arabino-heptulosonate 7-phosphate synthase 02 [Vitis vinifera]
		i2_HQ_K_c171200/f12p1/2117	Delta(24)-sterol reductase [Morus notabilis]
		i1_LQ_K_c31524/f1p1/1020	PREDICTED: 60S ribosomal protein L7a-1-like [Juglans regia]
		i1_HQ_K_c2110/f3p31/1464	8-hydroxygeraniol oxidoreductase [Catharanthus roseus]
		i0_HQ_K_c12712/f2p0/780	PREDICTED: mitochondrial fission 1 protein A-like [Nicotiana sylvestris]
		i1_HQ_K_c49466/f48p2/1615	PREDICTED: nucleosome assembly protein 1;4 [Vitis vinifera]
		i0_HQ_K_c2252/f2p0/788	PREDICTED: protein FAM32A-like [Juglans regia]
		i0_LQ_K_c10629/f1p1/745	PREDICTED: 60S ribosomal protein L34 [Daucus carota subsp. sativus]
		i1_HQ_K_c68467/f3p0/1036	PREDICTED: 60S ribosomal protein L10a-like [Elaeis guineensis]
		i0_HQ_K_c419/f7p0/573	PREDICTED: protein transport protein Sec61 subunit gamma-1 [Amborella trichopoda]
		i0_LQ_K_c28720/f1p5/796	PREDICTED: RNA-binding protein 8A-like [Nicotiana tabacum]
		i0_LQ_K_c8188/f1p0/661	PREDICTED: coiled-coil domain-containing protein 12 [Vitis vinifera]
		i0_HQ_K_c2585/f2p2/946	PREDICTED: ADP-ribosylation factor 2 isoform X1 [Nicotiana tomentosiformis]
		i1_HQ_K_c11531/f2p5/1249	PREDICTED: ER membrane protein complex subunit 3-like [Jatropha curcas]
		i1_HQ_K_c14960/f3p11/1869	PREDICTED: ATP synthase subunit beta, mitochondrial [Nelumbo nucifera]
		i1_LQ_K_c82974/f1p0/1042	PREDICTED: ferritin-2, chloroplastic [Nicotiana sylvestris]
		i1_LQ_K_c5376/f4p0/1188	heat shock factor B3 [Rhododendron calophytum]
		i1_HQ_K_c66927/f15p5/1392	PREDICTED: cycloartenol-C-24-methyltransferase isoform X1 [Vitis vinifera]
		i1_LQ_K_c6976/f1p2/1315	PREDICTED: BURP domain-containing protein BNM2A-like [Juglans regia]
		i0_HQ_K_c880/f6p1/810	PREDICTED: 60S ribosomal protein L9 [Cucumis sativus]
		i0_HQ_K_c4258/f3p6/498	PREDICTED: sm-like protein LSM2 [Vitis vinifera]
		i1_LQ_K_c46459/f1p1/1110	SVP3 [Actinidia eriantha var. eriantha]
		i2_HQ_K_c1283/f18p1/2168	PREDICTED: lysM domain receptor-like kinase 4 [Citrus sinensis]
		i0_LQ_K_c6625/f1p7/914	PREDICTED: peroxiredoxin-2F, mitochondrial [Sesamum indicum]
		i2_LQ_K_c129378/f1p31/2400	#N/A
		i1_HQ_K_c88999/f4p2/1916	PREDICTED: aspartic proteinase A1-like [Daucus carota subsp. sativus]
		i1_LQ_K_c66785/f1p0/1110	vacuolar ATP synthase subunit [Camellia sinensis]
		i1_HQ_K_c67649/f17p4/1508	PREDICTED: fasciclin-like arabinogalactan protein 2 [Eucalyptus grandis]
		i0_HQ_K_c1471/f4p0/572	PREDICTED: 40S ribosomal protein S29 [Fragaria vesca subsp. vesca]
		i0_LQ_K_c11668/f1p0/823	40S ribosomal protein s17 [Camellia sinensis]
		i0_LQ_K_c26415/f1p2/429	PREDICTED: 40S ribosomal protein S29-like [Ziziphus jujuba]
		i1_LQ_K_c42922/f1p2/1535	PREDICTED: 60S ribosomal protein L3 [Vitis vinifera]
		i1_HQ_K_c48806/f6p0/1878	GA signaling receptor [Actinidia deliciosa]
		i1_LQ_K_c60233/f1p0/1773	PREDICTED: vicianin hydrolase-like [Populus euphratica]
		i1_HQ_K_c12935/f2p0/1336	Heat stress transcription factor A-2c, putative [Theobroma cacao]
		i1_HQ_K_c16622/f42p3/1941	PREDICTED: cytochrome b561 and DOMON domain-containing protein At5g47530-like [Capsicum annuum]
		i1_LQ_K_c6924/f1p47/1350	peroxidase 3 [Nicotiana attenuata]
		i2_LQ_K_c51438/f1p1/2076	4-coumarate--CoA ligase 2 [Nicotiana tabacum]
		i0_HQ_K_c33281/f14p0/821	PREDICTED: calmodulin-like [Brassica napus]
		i0_LQ_K_c8292/f1p0/646	Cytochrome c [Dorcoceras hygrometricum]
		i0_HQ_K_c7864/f2p1/447	Preprotein translocase Sec, Sec61-beta subunit [Cynara cardunculus var. scolymus]
		i1_LQ_K_c53571/f1p0/1321	PREDICTED: cytochrome c oxidase subunit 6b-1-like [Nicotiana tomentosiformis]
		i1_LQ_K_c15262/f1p10/1050	PREDICTED: GTP-binding nuclear protein Ran-3 [Vitis vinifera]
		i1_HQ_K_c86812/f4p2/1979	FRIGIDA-like protein isoform 1 [Theobroma cacao]
		i0_LQ_K_c36439/f1p5/847	PREDICTED: ubiquitin-conjugating enzyme E2 10-like [Gossypium hirsutum]
		i1_LQ_K_c29917/f1p3/1028	PREDICTED: cell number regulator 8 [Vitis vinifera]
		i0_LQ_K_c3571/f1p0/832	PREDICTED: ubiquitin-conjugating enzyme E2 variant 1C [Cucumis sativus]
		i1_HQ_K_c17906/f5p0/1865	actin [Phlomis umbrosa]
Yellow	85	i0_HQ_K_c34289/f15p0/815	RecName: Full=Kirola; AltName: Allergen=Act d 11
		i1_LQ_K_c83260/f1p1/1145	PREDICTED: probable aquaporin PIP2-8 [Tarenaya hassleriana]
		i0_HQ_K_c1983/f5p0/539	F9L1.21 protein [Cucumis sativus]
		i0_HQ_K_c33950/f2p0/502	PREDICTED: ATP synthase subunit d, mitochondrial [Sesamum indicum]
		i1_LQ_K_c37645/f1p1/1183	PREDICTED: metalloendoproteinase 2-MMP [Vitis vinifera]
		i0_HQ_K_c33265/f16p0/940	PREDICTED: glutathione S-transferase F9-like isoform X2 [Prunus mume]
		i0_LQ_K_c3075/f1p1/754	bet v 1 related allergen [Actinidia deliciosa]
		i0_HQ_K_c897/f4p0/972	manganese superoxide dismutase MSD2 [Camellia sinensis]
		i0_HQ_K_c33427/f10p0/718	PREDICTED: thioredoxin H2-like [Arachis duranensis]
		i0_HQ_K_c13779/f4p1/622	PREDICTED: snakin-2 [Pyrus x bretschneideri]
		i0_HQ_K_c16631/f19p0/628	PREDICTED: protein translation factor SUI1 homolog 2 [Glycine max]
		i0_HQ_K_c796/f12p0/520	PREDICTED: early nodulin-93-like [Daucus carota subsp. sativus]
		i0_HQ_K_c4776/f3p5/727	PREDICTED: thioredoxin H2-like [Arachis ipaensis]
		i0_HQ_K_c2061/f4p0/758	late embryogenesis abundant protein 3L-1 [Camellia sinensis]
		i0_HQ_K_c1135/f4p0/879	ethylene response factor 6 [Actinidia deliciosa]
		i0_LQ_K_c6590/f1p1/649	PREDICTED: ubiquitin-conjugating enzyme E2 36 [Nelumbo nucifera]
		i2_HQ_K_c5632/f4p6/2696	manganese superoxide dismutase [Camellia sinensis]
		i0_LQ_K_c11638/f1p17/851	PREDICTED: probable histone H2B.1 [Juglans regia]
		i0_LQ_K_c23504/f1p0/876	6,7-dimethyl-8-ribityllumazine synthase [Theobroma cacao]
		i1_HQ_K_c89733/f5p1/1142	PREDICTED: mitochondrial outer membrane protein porin of 34 kDa-like [Juglans regia]
		i0_HQ_K_c1883/f6p196/868	PREDICTED: auxin-responsive protein IAA1 [Nelumbo nucifera]
		i1_HQ_K_c18951/f2p3/1300	PREDICTED: transcription factor MYB1R1 [Vitis vinifera]
		i1_HQ_K_c23267/f2p0/1197	PREDICTED: coatomer subunit epsilon-1 [Ziziphus jujuba]
		i2_LQ_K_c178449/f1p9/2505	#N/A
		i0_HQ_K_c17241/f16p0/798	putative universal stress protein [Catharanthus roseus]
		i0_HQ_K_c864/f7p5/792	ethylene response factor 6 [Actinidia deliciosa]
		i1_HQ_K_c1934/f3p1/1462	PREDICTED: protein disulfide-isomerase like 2-1-like [Sesamum indicum]
		i1_HQ_K_c48874/f7p1/1388	PREDICTED: cysteine synthase [Jatropha curcas]
		i2_LQ_K_c67405/f1p2/2625	PREDICTED: S-adenosylmethionine synthase 2 [Gossypium hirsutum]
		i2_HQ_K_c139164/f2p2/2495	PREDICTED: cationic amino acid transporter 2, vacuolar-like [Daucus carota subsp. sativus]
		i1_LQ_K_c36640/f1p6/1469	PREDICTED: glutamine synthetase cytosolic isozyme [Jatropha curcas]
		i1_HQ_K_c69828/f3p1/1189	MYB transcription factor 1 [Camellia sinensis]
		i1_HQ_K_c88059/f34p0/1130	C1-like protein [Cynara cardunculus var. scolymus]
		i1_HQ_K_c1193/f4p1/1632	Os02g0161900, partial [Oryza sativa Japonica Group]
		i1_LQ_K_c45358/f3p0/1080	xyloglucan endotransglucosylase/hydrolase 7 [Actinidia deliciosa]
		i1_HQ_K_c68160/f2p0/1320	actinidin Act4b [Actinidia eriantha]
		i1_HQ_K_c87274/f77p5/1170	RecName: Full=Endochitinase A; Short=CHN-A; Flags: Precursor
		i0_LQ_K_c22152/f1p6/939	PREDICTED: germin-like protein subfamily 1 member 13 isoform X3 [Theobroma cacao]
		i1_HQ_K_c87999/f9p5/1139	PREDICTED: endochitinase 4 [Solanum pennellii]
		i1_HQ_K_c87957/f13p1/1108	PREDICTED: glutathione S-transferase-like [Nelumbo nucifera]
		i1_LQ_K_c40248/f1p1/1135	aquaporin protein 12 [Camellia sinensis]
		i2_LQ_K_c17034/f1p4/2097	#N/A
		i1_HQ_K_c50041/f2p1/1182	aquaporin PIP2;2 [Quercus petraea]
		i1_LQ_K_c86329/f1p0/1032	14-3-3 domain-containing protein [Cephalotus follicularis]
		i1_HQ_K_c77308/f3p10/1376	PREDICTED: endochitinase B [Nicotiana tabacum]
		i1_LQ_K_c70214/f1p2/1234	aquaporin protein AQU17 [Camellia sinensis]
		i1_HQ_K_c49498/f19p2/1163	aquaporin protein AQU17 [Camellia sinensis]
		i1_LQ_K_c78907/f1p15/1218	PREDICTED: aquaporin PIP2-3-like [Nicotiana attenuata]
		i1_LQ_K_c41266/f1p1/1454	PREDICTED: protein DJ-1 homolog D [Jatropha curcas]
		i1_HQ_K_c11141/f7p0/1194	PREDICTED: protein SRC2 [Nelumbo nucifera]
		i1_HQ_K_c67390/f3p9/1248	aquaporin protein AQU17 [Camellia sinensis]
		i1_LQ_K_c44474/f1p0/1516	aquaporin PIP2;2 [Quercus petraea]
		i1_HQ_K_c88038/f5p2/1142	PREDICTED: peroxidase P7-like [Ipomoea nil]
		i1_HQ_K_c17902/f6p1/1495	protein disulfide-isomerase like 2-1 precursor [Solanum lycopersicum]
		i1_LQ_K_c25293/f1p0/1834	cysteine protease Cp6 [Actinidia deliciosa]
		i0_LQ_K_c27829/f1p0/645	aquaporin [Camellia oleifera]
		i1_HQ_K_c1844/f9p1/1374	PREDICTED: peroxidase 73 [Vitis vinifera]
		i1_HQ_K_c38481/f2p1/1485	PREDICTED: WAT1-related protein At5g07050 [Populus euphratica]
		i2_HQ_K_c65009/f2p5/2185	PREDICTED: 2,3-bisphosphoglycerate-independent phosphoglycerate mutase [Ziziphus jujuba]
		i0_HQ_K_c16962/f2p0/692	PREDICTED: cytochrome b5 isoform A-like [Nicotiana sylvestris]
		i0_HQ_K_c8870/f2p0/988	putative sigma factor sigb regulation protein rsbq [Corchorus olitorius]
		i1_LQ_K_c96718/f1p1/1010	aquaporin protein 6 [Camellia sinensis]
		i1_HQ_K_c88762/f85p2/1925	PREDICTED: ethylene-responsive transcription factor RAP2-4-like isoform X1 [Ipomoea nil]
		i1_HQ_K_c49025/f51p1/1038	aquaporin protein 6 [Camellia sinensis]
		i2_HQ_K_c97180/f12p4/2130	aspartic protease [Sarracenia purpurea subsp. venosa]
		i1_HQ_K_c67052/f6p1/1381	cinnamyl alcohol dehydrogenase [Ocimum tenuiflorum]
		i1_LQ_K_c31065/f1p1/1023	allene oxide cyclase [Catharanthus roseus]
		i0_HQ_K_c10121/f2p23/984	aquaporin protein 6 [Camellia sinensis]
		i1_HQ_K_c88780/f61p1/1967	PREDICTED: ethylene-responsive transcription factor RAP2-4 [Vitis vinifera]
		i1_HQ_K_c58672/f3p0/1532	alcohol acyltransferase [Actinidia deliciosa]
		i1_HQ_K_c8151/f4p2/1289	aquaporin protein AQU17 [Camellia sinensis]
		i1_HQ_K_c88111/f4p1/1133	DUF3700 domain-containing protein [Cephalotus follicularis]
		i1_LQ_K_c40053/f1p2/1343	MYB transcription factor 1 [Camellia sinensis]
		i0_LQ_K_c24255/f1p0/412	PREDICTED: epidermis-specific secreted glycoprotein EP1-like [Capsicum annuum]
		i0_LQ_K_c23036/f1p0/674	PREDICTED: nodulin-related protein 1 [Vitis vinifera]
		i1_HQ_K_c10617/f8p0/1166	PREDICTED: peroxidase 5-like [Juglans regia]
		i1_LQ_K_c43851/f1p6/1846	PREDICTED: endoplasmin homolog [Juglans regia]
		i1_HQ_K_c14894/f3p1/1259	PREDICTED: ER membrane protein complex subunit 2 [Theobroma cacao]
		i0_HQ_K_c1458/f7p0/976	PREDICTED: germin-like protein 5-1 [Cucumis sativus]
		i1_LQ_K_c72245/f1p0/1194	PREDICTED: SPX domain-containing protein 1 [Ricinus communis]
		i0_HQ_K_c9580/f3p2/626	PREDICTED: autophagy-related protein 8C [Solanum tuberosum]
		i0_LQ_K_c5413/f2p0/885	PREDICTED: probable nucleoredoxin 1 isoform X2 [Juglans regia]
		i0_LQ_K_c27774/f1p16/896	PREDICTED: HMG1/2-like protein isoform X1 [Vitis vinifera]
		i0_LQ_K_c25013/f1p0/932	RecName: Full=Kirola; AltName: Allergen=Act d 11
		i1_LQ_K_c45660/f2p0/1045	CS domain-containing protein [Cynara cardunculus var. scolymus]
Brown	153	i0_HQ_K_c33664/f28p0/550	Bifunctional inhibitor/lipid-transfer protein/seed storage 2S albumin superfamily protein isoform 1 [Theobroma cacao]
		i0_LQ_K_c411/f10p0/528	PREDICTED: cytochrome b-c1 complex subunit 8 [Phoenix dactylifera]
		i1_LQ_K_c42328/f1p0/1543	plasma membrane intrinsic protein [Dianthus caryophyllus]
		i0_LQ_K_c20556/f1p0/600	PREDICTED: cytochrome c oxidase subunit 6a, mitochondrial [Arachis ipaensis]
		i0_LQ_K_c3451/f1p3/702	PREDICTED: NADH dehydrogenase [ubiquinone] 1 beta subcomplex subunit 10-B [Ipomoea nil]
		i0_LQ_K_c7158/f1p0/689	60S ribosomal protein L21-1 [Ananas comosus]
		i0_HQ_K_c2282/f7p0/865	PREDICTED: adenine phosphoribosyltransferase 1-like [Nicotiana attenuata]
		i0_HQ_K_c1784/f3p0/792	PREDICTED: peptidyl-prolyl cis-trans isomerase Pin1-like [Nicotiana tomentosiformis]
		i2_LQ_K_c64300/f1p3/2942	PREDICTED: hybrid signal transduction histidine kinase A [Vitis vinifera]
		i0_HQ_K_c33535/f5p5/889	PREDICTED: mitochondrial fission 1 protein A-like [Nicotiana tomentosiformis]
		i2_LQ_K_c3359/f1p12/2283	PREDICTED: HMG1/2-like protein [Nelumbo nucifera]
		i0_LQ_K_c19005/f1p0/440	Histone H4 [Zea mays]
		i0_LQ_K_c19929/f1p0/495	PREDICTED: DNA-binding protein S1FA [Vitis vinifera]
		i1_LQ_K_c15850/f1p2/1102	PREDICTED: THO complex subunit 4A [Theobroma cacao]
		i1_LQ_K_c18958/f1p3/1190	aquaporin protein AQU19 [Camellia sinensis]
		i0_LQ_K_c13419/f3p0/559	PREDICTED: protein transport protein Sec61 subunit gamma [Elaeis guineensis]
		i1_LQ_K_c30935/f1p0/1083	PREDICTED: zinc finger A20 and AN1 domain-containing stress-associated protein 4-like [Daucus carota subsp. sativus]
		i0_LQ_K_c29277/f1p0/578	PREDICTED: dynein light chain 2, cytoplasmic [Glycine max]
		i0_LQ_K_c6895/f1p0/545	PREDICTED: non-specific lipid-transfer protein 2-like [Vitis vinifera]
		i0_HQ_K_c33275/f7p0/706	histone H3 [Corchorus capsularis]
		i2_HQ_K_c59666/f3p4/2374	beta-ketoacyl-ACP synthase I [Cocos nucifera]
		i1_HQ_K_c81465/f3p0/1070	PREDICTED: transcription factor ILR3-like [Sesamum indicum]
		i0_LQ_K_c11857/f1p0/525	PREDICTED: selenoprotein K [Prunus mume]
		i0_LQ_K_c28221/f1p30/607	PREDICTED: small ubiquitin-related modifier 1-like [Juglans regia]
		i1_LQ_K_c20841/f1p0/1198	bZIP transcription factor 15 [Camellia sinensis]
		i0_HQ_K_c34651/f3p0/666	PREDICTED: cytochrome b5-like [Gossypium hirsutum]
		i2_LQ_K_c184734/f1p2/2016	PREDICTED: aquaporin TIP1-1 [Eucalyptus grandis]
		i0_LQ_K_c19892/f1p0/746	PREDICTED: histone H3-like centromeric protein CSE4 [Camelina sativa]
		i0_HQ_K_c10184/f3p1/960	PREDICTED: probable glutathione S-transferase parC [Capsicum annuum]
		i2_LQ_K_c34877/f1p0/2945	sucrose synthase [Actinidia chinensis]
		i0_HQ_K_c732/f7p0/830	PREDICTED: probable ubiquitin-conjugating enzyme E2 16 [Juglans regia]
		i1_LQ_K_c30286/f1p0/1079	PREDICTED: transcription factor ILR3-like [Sesamum indicum]
		i1_LQ_K_c47803/f1p2/1048	PREDICTED: histone H1 [Ziziphus jujuba]
		i0_LQ_K_c4545/f1p0/871	PREDICTED: microsomal glutathione S-transferase 3 [Sesamum indicum]
		i2_LQ_K_c86744/f1p5/2017	3-hydroxy-3-methylglutaryl-CoA synthase [Camellia sinensis]
		i1_HQ_K_c86937/f3p1/1219	PREDICTED: transcription factor MYB48-like isoform X1 [Juglans regia]
		i0_LQ_K_c14192/f1p1/970	PREDICTED: transmembrane emp24 domain-containing protein p24delta3 [Vitis vinifera]
		i1_HQ_K_c32058/f33p2/1659	PREDICTED: ectonucleotide pyrophosphatase/phosphodiesterase family member 3-like [Nicotiana tomentosiformis]
		i0_LQ_K_c19272/f1p0/967	PREDICTED: soluble inorganic pyrophosphatase 1-like [Juglans regia]
		i0_LQ_K_c15782/f1p0/360	PREDICTED: ubiquitin-conjugating enzyme E2 variant 1D [Sesamum indicum]
		i1_HQ_K_c67137/f16p16/1428	polyubiquitin-like [Ananas comosus]
		i0_HQ_K_c18461/f2p9/652	PREDICTED: protein yippee-like At5g53940 isoform X2 [Eucalyptus grandis]
		i0_LQ_K_c25642/f1p1/806	superoxide dismutase [Salix matsudana]
		i1_LQ_K_c84390/f1p2/1021	PREDICTED: enoyl-CoA delta isomerase 2, peroxisomal-like [Juglans regia]
		i2_LQ_K_c36619/f1p6/2640	PREDICTED: hypersensitive-induced response protein 2 [Populus euphratica]
		i0_LQ_K_c8217/f1p2/832	calmodulin-7, partial [Nicotiana attenuata]
		i1_LQ_K_c11040/f1p0/1163	jasmonate-zim-domain protein 1 [Camellia sinensis var. sinensis]
		i0_HQ_K_c1788/f2p1/459	PREDICTED: ubiquitin-fold modifier 1 [Juglans regia]
		i2_HQ_K_c74453/f29p8/2131	PREDICTED: calnexin homolog [Daucus carota subsp. sativus]
		i0_HQ_K_c858/f11p0/801	PREDICTED: actin-depolymerizing factor 5 [Prunus mume]
		i1_HQ_K_c88546/f5p1/1049	PREDICTED: abscisic acid receptor PYL9-like [Fragaria vesca subsp. vesca]
		i0_HQ_K_c1840/f3p0/834	profilin-like [Solanum tuberosum]
		i2_HQ_K_c36082/f6p0/2277	PDC1 [Actinidia deliciosa]
		i0_LQ_K_c1537/f6p0/750	histone H1-like [Nicotiana tabacum]
		i2_LQ_K_c40924/f1p0/2250	#N/A
		i0_HQ_K_c33652/f46p0/771	Histone H2A [Cajanus cajan]
		i0_LQ_K_c2303/f1p0/930	PREDICTED: protein PLANT CADMIUM RESISTANCE 2-like, partial [Erythranthe guttata]
		i3_LQ_K_c15782/f1p0/3015	#N/A
		i1_HQ_K_c11738/f5p4/1259	fructokinase [Actinidia chinensis]
		i0_HQ_K_c33221/f20p0/737	PREDICTED: histone H1-like [Nelumbo nucifera]
		i1_HQ_K_c67446/f5p1/1580	PREDICTED: dnaJ protein homolog [Theobroma cacao]
		i2_LQ_K_c10694/f1p72/2538	sucrose synthase [Actinidia deliciosa]
		i0_LQ_K_c2747/f1p0/912	PREDICTED: microsomal glutathione S-transferase 3 [Sesamum indicum]
		i0_LQ_K_c20714/f1p0/857	PREDICTED: histone H1-like [Nelumbo nucifera]
		i0_HQ_K_c16815/f2p0/828	PREDICTED: ferredoxin-3, chloroplastic [Vitis vinifera]
		i0_LQ_K_c25932/f1p8/687	ethylene response factor 8 [Actinidia deliciosa]
		i0_HQ_K_c902/f10p0/664	Cytochrome c [Dorcoceras hygrometricum]
		i0_HQ_K_c14055/f4p0/784	PREDICTED: SUMO-conjugating enzyme SCE1 [Ziziphus jujuba]
		i0_LQ_K_c4252/f1p2/959	PREDICTED: histone H1-like [Nelumbo nucifera]
		i1_HQ_K_c2372/f4p1/1619	PREDICTED: dnaJ protein homolog [Theobroma cacao]
		i0_HQ_K_c18315/f2p0/829	PREDICTED: ferredoxin-3, chloroplastic [Vitis vinifera]
		i1_HQ_K_c1938/f7p0/1295	PREDICTED: histone H1 [Ziziphus jujuba]
		i0_LQ_K_c27887/f1p0/798	UQ_con domain-containing protein [Cephalotus follicularis]
		i0_HQ_K_c1270/f2p4/724	PREDICTED: actin-depolymerizing factor [Vitis vinifera]
		i1_HQ_K_c16935/f3p0/1146	PREDICTED: protein EXORDIUM-like 2 [Nicotiana tomentosiformis]
		i0_LQ_K_c19510/f1p6/793	small heat shock protein HSP17.7 [Vaccinium corymbosum]
		i1_LQ_K_c41493/f1p0/1583	plasma membrane intrinsic protein [Dianthus caryophyllus]
		i1_HQ_K_c86745/f14p7/1735	UDP-glycosyltransferase 73A20 [Camellia sinensis]
		i0_LQ_K_c12243/f1p2/480	PREDICTED: protein transport protein Sec61 subunit gamma-1 [Amborella trichopoda]
		i0_LQ_K_c29271/f1p2/721	conserved hypothetical protein [Ricinus communis]
		i1_HQ_K_c44849/f6p7/1065	14-3-3-like protein [Gossypium barbadense]
		i1_HQ_K_c26663/f4p0/1250	PREDICTED: histone H1-like, partial [Arachis ipaensis]
		i1_HQ_K_c4484/f2p15/1783	PREDICTED: eukaryotic translation initiation factor 3 subunit E [Arachis duranensis]
		i1_LQ_K_c8870/f1p0/1312	ACC oxidase 5 [Actinidia chinensis]
		i1_HQ_K_c87108/f2p0/1178	PREDICTED: heavy metal-associated isoprenylated plant protein 3-like isoform X2 [Pyrus x bretschneideri]
		i1_LQ_K_c19661/f1p3/1129	6-phosphofructokinase 3-like protein [Camellia sinensis]
		i1_HQ_K_c67158/f11p0/1211	PREDICTED: histone H1 [Ziziphus jujuba]
		i0_HQ_K_c1266/f3p0/795	profilin-1 [Jatropha curcas]
		i0_HQ_K_c18698/f2p1/398	BolA protein [Corchorus olitorius]
		i1_LQ_K_c35123/f1p0/1221	JAZ3 [Vitis rupestris]
		i1_LQ_K_c4438/f1p4/1300	PREDICTED: vacuolar protein sorting-associated protein 32 homolog 2 [Nicotiana attenuata]
		i0_LQ_K_c8567/f2p1/491	PREDICTED: putative uncharacterized transmembrane protein DDB_G0293028 isoform X2 [Nicotiana tomentosiformis]
		i0_LQ_K_c21850/f1p0/928	ethylene response factor 12 [Actinidia deliciosa]
		i0_HQ_K_c2226/f3p2/728	PREDICTED: stress enhanced protein 1, chloroplastic [Theobroma cacao]
		i0_LQ_K_c20814/f1p0/790	PREDICTED: histone H1-like [Nelumbo nucifera]
		i1_LQ_K_c35993/f1p1/1315	PREDICTED: dnaJ protein homolog [Theobroma cacao]
		i0_HQ_K_c1437/f4p0/960	PREDICTED: tropinone reductase-like 3 isoform X1 [Nelumbo nucifera]
		i1_HQ_K_c32155/f2p0/1298	PREDICTED: tobamovirus multiplication protein 2A-like [Gossypium raimondii]
		i1_HQ_K_c1800/f8p2/1161	D-galacturonic acid reductase 2, partial [Actinidia deliciosa]
		i1_HQ_K_c86858/f7p0/1244	PREDICTED: plastid-lipid-associated protein, chloroplastic-like [Juglans regia]
		i1_HQ_K_c21568/f3p0/1341	PREDICTED: ER membrane protein complex subunit 10 [Theobroma cacao]
		i2_HQ_K_c89805/f2p9/2212	PDC1 [Actinidia deliciosa]
		i1_HQ_K_c62531/f3p1/1106	PREDICTED: glutathione S-transferase L3 [Vitis vinifera]
		i1_LQ_K_c61348/f1p0/1212	NAC transcription factor [Diospyros kaki]
		i0_LQ_K_c14108/f1p4/709	PREDICTED: universal stress protein A-like protein [Vitis vinifera]
		i1_LQ_K_c30195/f1p0/1101	PREDICTED: GTP-binding protein YPTM2 [Populus euphratica]
		i0_LQ_K_c19936/f1p0/968	PREDICTED: histone H1 [Ziziphus jujuba]
		i1_LQ_K_c36606/f1p0/1990	PREDICTED: actin-depolymerizing factor 1-like isoform X1 [Gossypium arboreum]
		i0_HQ_K_c1265/f4p0/602	PREDICTED: sec-independent protein translocase protein TATA, chloroplastic [Ricinus communis]
		i1_HQ_K_c27049/f2p1/1185	PREDICTED: caffeoylshikimate esterase [Ziziphus jujuba]
		i0_HQ_K_c4836/f3p0/765	bet v 1 related allergen [Actinidia deliciosa]
		i0_LQ_K_c13211/f1p0/709	senescence-associated protein, putative [Medicago truncatula]
		i0_HQ_K_c33258/f11p0/974	glutathione S-transferase 1 [Diospyros kaki]
		i0_HQ_K_c33659/f33p0/738	PREDICTED: uncharacterized protein C6C3.02c [Vitis vinifera]
		i0_HQ_K_c33220/f18p0/862	PREDICTED: profilin [Capsicum annuum]
		i0_HQ_K_c740/f5p0/660	PREDICTED: histone H2B [Vitis vinifera]
		i0_HQ_K_c33548/f6p2/659	PREDICTED: nuclear transport factor 2-like [Sesamum indicum]
		i0_LQ_K_c2115/f3p0/656	PREDICTED: probable histone H2B.1 [Cicer arietinum]
		i0_LQ_K_c22312/f1p0/580	PREDICTED: mitochondrial pyruvate carrier 1 isoform X1 [Sesamum indicum]
		i0_HQ_K_c170/f15p0/779	PREDICTED: 17.3 kDa class I heat shock protein-like [Ipomoea nil]
		i0_HQ_K_c33244/f12p3/655	Thioredoxin [Corchorus olitorius]
		i1_HQ_K_c88026/f7p1/1162	PREDICTED: ran-binding protein 1 homolog b [Vitis vinifera]
		i0_HQ_K_c2230/f5p10/850	PREDICTED: probable glutathione S-transferase [Eucalyptus grandis]
		i1_LQ_K_c74697/f1p1/1573	PREDICTED: dnaJ protein homolog [Theobroma cacao]
		i1_HQ_K_c24338/f2p0/1201	PREDICTED: cytochrome c1-2, heme protein, mitochondrial [Prunus mume]
		i0_HQ_K_c329/f11p0/699	PREDICTED: nuclear transport factor 2-like [Sesamum indicum]
		i1_LQ_K_c96702/f1p2/1017	glutathione S-transferase 1 [Diospyros kaki]
		i1_HQ_K_c49380/f7p1/1407	PREDICTED: 12-oxophytodienoate reductase 2-like [Prunus mume]
		i0_HQ_K_c1572/f6p0/800	Nucleic acid-binding, OB-fold [Cynara cardunculus var. scolymus]
		i0_HQ_K_c18219/f2p0/954	PREDICTED: proactivator polypeptide-like 1 [Theobroma cacao]
		i1_LQ_K_c16082/f1p1/1068	DUF3700 domain-containing protein [Cephalotus follicularis]
		i1_HQ_K_c1867/f9p2/1974	PREDICTED: calnexin homolog 1-like [Nicotiana tabacum]
		i0_HQ_K_c1556/f6p5/633	PREDICTED: autophagy-related protein 8f isoform X1 [Gossypium arboreum]
		i0_HQ_K_c2498/f2p0/933	PREDICTED: transmembrane emp24 domain-containing protein p24beta3-like isoform X1 [Juglans regia]
		i0_LQ_K_c3520/f1p0/888	PREDICTED: GTP-binding nuclear protein Ran-3-like [Juglans regia]
		i0_HQ_K_c10142/f3p2/819	profilin-1 [Jatropha curcas]
		i0_HQ_K_c8326/f3p2/987	Expansin-like A1 [Morus notabilis]
		i0_LQ_K_c33844/f5p0/838	PREDICTED: ubiquitin-conjugating enzyme E2 10-like [Gossypium hirsutum]
		i0_HQ_K_c1255/f4p0/947	PREDICTED: probable glutathione S-transferase parC [Capsicum annuum]
		i1_LQ_K_c72187/f1p0/1470	PREDICTED: polyubiquitin [Sesamum indicum]
		i0_HQ_K_c1792/f2p0/764	PREDICTED: cytochrome b5-like [Nicotiana attenuata]
		i0_HQ_K_c1622/f4p3/579	Preprotein translocase Sec [Theobroma cacao]
		i0_LQ_K_c24679/f1p0/680	PREDICTED: mitochondrial pyruvate carrier 1 isoform X1 [Sesamum indicum]
		i0_LQ_K_c2110/f2p48/918	PREDICTED: VQ motif-containing protein 4-like [Solanum tuberosum]
		i0_HQ_K_c7061/f2p0/611	PREDICTED: glutaredoxin-like [Juglans regia]
		i1_HQ_K_c19286/f4p0/1408	PREDICTED: 12-oxophytodienoate reductase 2-like [Prunus mume]
		i1_HQ_K_c89405/f3p15/1650	JAZ3 [Vitis rupestris]
		i0_HQ_K_c1926/f4p0/892	FLAVODOXIN-LIKE QUINONE REDUCTASE 1 family protein [Populus trichocarpa]
		i2_HQ_K_c170386/f51p10/2368	PREDICTED: probable mediator of RNA polymerase II transcription subunit 37c [Tarenaya hassleriana]
		i2_LQ_K_c156374/f1p3/2114	PREDICTED: histone H2B [Tarenaya hassleriana]
		i0_HQ_K_c18306/f2p0/957	PREDICTED: ras-related protein RABH1b [Vitis vinifera]
		i1_LQ_K_c9809/f1p1/1190	PREDICTED: probable glutathione S-transferase [Theobroma cacao]
		i0_HQ_K_c35756/f2p0/688	histone H3 [Euphorbia lathyris]
Blue	657	i2_LQ_K_c185895/f1p40/2270	RecName: Full=3-hydroxy-3-methylglutaryl-coenzyme A reductase; Short=HMG-CoA reductase
		i1_HQ_K_c88050/f42p3/1563	PREDICTED: formate dehydrogenase, mitochondrial [Vitis vinifera]
		i1_LQ_K_c55212/f1p0/1656	S-locus glycoprotein [Corchorus capsularis]
		i2_LQ_K_c84849/f1p0/2336	RecName: Full=3-hydroxy-3-methylglutaryl-coenzyme A reductase; Short=HMG-CoA reductase
		i1_LQ_K_c19961/f1p1/1449	PREDICTED: 1-aminocyclopropane-1-carboxylate oxidase homolog 1-like [Sesamum indicum]
		i2_HQ_K_c44127/f2p2/2584	RecName: Full=3-hydroxy-3-methylglutaryl-coenzyme A reductase; Short=HMG-CoA reductase
		i1_HQ_K_c5161/f4p5/1620	S-locus glycoprotein [Corchorus capsularis]
		i1_HQ_K_c87840/f47p12/1598	PREDICTED: phosphoserine aminotransferase 2, chloroplastic [Ziziphus jujuba]
		i1_LQ_K_c21194/f1p0/1227	Expansin-related protein 1 precursor [Populus trichocarpa]
		i2_LQ_K_c104442/f1p7/2551	#N/A
		i1_HQ_K_c62710/f3p1/1050	PREDICTED: GTP-binding protein SAR1A [Ricinus communis]
		i1_LQ_K_c22430/f9p0/1438	PREDICTED: 1-aminocyclopropane-1-carboxylate oxidase homolog 1-like [Sesamum indicum]
		i2_LQ_K_c45823/f1p5/2653	3-hydroxy-3-methylglutaryl coenzyme A reductase [Camellia sinensis]
		i1_LQ_K_c96139/f1p0/1002	PREDICTED: putative F-box protein PP2-B12 isoform X2 [Populus euphratica]
		i1_HQ_K_c81739/f2p0/1048	ethylene response factor 4 [Actinidia deliciosa]
		i1_HQ_K_c7148/f2p0/1799	PREDICTED: beta-amyrin 28-oxidase-like [Sesamum indicum]
		i1_HQ_K_c88289/f7p1/1225	PREDICTED: probable pyridoxal 5'-phosphate synthase subunit PDX1 [Juglans regia]
		i0_HQ_K_c2247/f3p0/977	PREDICTED: plasma membrane-associated cation-binding protein 1-like [Juglans regia]
		i2_HQ_K_c55479/f2p0/2533	RecName: Full=3-hydroxy-3-methylglutaryl-coenzyme A reductase; Short=HMG-CoA reductase
		i1_LQ_K_c28460/f1p1/1137	Expansin-related protein 1 precursor [Populus trichocarpa]
		i1_HQ_K_c11888/f2p22/1277	PREDICTED: E3 ubiquitin-protein ligase RMA1H1 [Vitis vinifera]
		i0_HQ_K_c14300/f3p0/917	Cu/Zn superoxide dismutase family protein [Populus trichocarpa]
		i1_HQ_K_c10667/f3p1/1217	PREDICTED: peroxidase N-like [Pyrus x bretschneideri]
		i2_LQ_K_c32424/f1p15/1945	PREDICTED: 1-aminocyclopropane-1-carboxylate oxidase homolog 1-like [Sesamum indicum]
		i1_LQ_K_c32466/f3p3/1253	PREDICTED: NADH--cytochrome b5 reductase 1-like [Gossypium hirsutum]
		i1_HQ_K_c7064/f4p0/1688	PREDICTED: basic 7S globulin-like [Jatropha curcas]
		i2_HQ_K_c78927/f2p0/2240	RecName: Full=3-hydroxy-3-methylglutaryl-coenzyme A reductase; Short=HMG-CoA reductase
		i1_LQ_K_c75361/f1p3/1406	cytosolic malate dehydrogenase [Camellia sinensis]
		i1_HQ_K_c86831/f10p1/1594	PREDICTED: eukaryotic translation initiation factor 3 subunit M [Vitis vinifera]
		i1_HQ_K_c88221/f2p2/1583	JAZ3 [Vitis rupestris]
		i2_HQ_K_c171247/f95p7/2498	EIN3-like protein EIL1 [Actinidia chinensis]
		i1_HQ_K_c88514/f6p1/1050	PREDICTED: 60S ribosomal protein L7-2-like [Juglans regia]
		i0_HQ_K_c26116/f2p2/869	bet v 1 related allergen [Actinidia chinensis]
		i0_LQ_K_c9931/f1p48/949	PREDICTED: auxin-responsive protein IAA1 [Jatropha curcas]
		i0_LQ_K_c19054/f1p0/686	PREDICTED: auxin-responsive protein SAUR32 [Citrus sinensis]
		i1_HQ_K_c16697/f7p1/1622	pyruvate dehydrogenase complex E1 alpha subunit dehydrogenase [Camellia sinensis]
		i1_HQ_K_c51195/f3p4/1768	3-hydroxy-3-methylglutaryl coenzyme A reductase [Camellia sinensis]
		i1_LQ_K_c47980/f1p0/1105	ethylene response factor 4 [Actinidia deliciosa]
		i2_HQ_K_c4278/f2p0/2373	Hydroxymethylglutaryl-CoA reductase, class I/II [Cynara cardunculus var. scolymus]
		i1_LQ_K_c3918/f1p7/1793	squalene synthase [Camellia oleifera]
		i1_HQ_K_c52946/f2p2/1303	PREDICTED: peroxisome biogenesis protein 22-like [Ipomoea nil]
		i1_LQ_K_c83255/f1p1/1025	PREDICTED: 60S ribosomal protein L6 [Eucalyptus grandis]
		i2_HQ_K_c17364/f53p5/2372	PREDICTED: eukaryotic translation initiation factor 3 subunit B [Vitis vinifera]
		i1_LQ_K_c78771/f1p2/1417	peroxidase [Camellia oleifera]
		i2_LQ_K_c141102/f1p1/2030	PREDICTED: E3 ubiquitin-protein ligase RMA1H1 [Vitis vinifera]
		i1_LQ_K_c83572/f1p18/1062	PREDICTED: universal stress protein A-like protein [Ricinus communis]
		i1_HQ_K_c67797/f5p1/1161	PREDICTED: vestitone reductase [Vitis vinifera]
		i2_LQ_K_c23702/f1p1/2241	RecName: Full=3-hydroxy-3-methylglutaryl-coenzyme A reductase; Short=HMG-CoA reductase
		i1_LQ_K_c67155/f1p0/1459	ADH1 [Actinidia deliciosa]
		i1_LQ_K_c38965/f1p0/1342	ADH2 [Actinidia deliciosa]
		i0_HQ_K_c34385/f10p0/505	PREDICTED: early nodulin-93 [Theobroma cacao]
		i1_LQ_K_c29713/f1p0/1563	ADH1 [Actinidia deliciosa]
		i1_LQ_K_c74053/f1p0/1659	PREDICTED: fructose-bisphosphate aldolase cytoplasmic isozyme [Sesamum indicum]
		i1_LQ_K_c12806/f1p2/1245	ADH2 [Actinidia deliciosa]
		i0_LQ_K_c28478/f1p4/497	Universal stress protein A [Corchorus olitorius]
		i0_LQ_K_c9912/f1p0/834	thaumatin-like protein [Actinidia deliciosa]
		i1_HQ_K_c4804/f3p19/1387	ADH2 [Actinidia deliciosa]
		i0_HQ_K_c1276/f3p0/667	PREDICTED: thioredoxin H-type [Ziziphus jujuba]
		i0_LQ_K_c34170/f47p0/757	bet v 1 related allergen [Actinidia deliciosa]
		i3_HQ_K_c43887/f20p0/3061	sucrose synthase [Actinidia chinensis]
		i0_HQ_K_c34310/f26p0/758	PREDICTED: protein EARLY RESPONSIVE TO DEHYDRATION 15-like [Ziziphus jujuba]
		i1_LQ_K_c39333/f1p0/1372	ADH2 [Actinidia deliciosa]
		i0_HQ_K_c17184/f17p2/765	bet v 1 related allergen [Actinidia deliciosa]
		i1_LQ_K_c71850/f1p0/1621	PREDICTED: fructose-bisphosphate aldolase cytoplasmic isozyme [Sesamum indicum]
		i0_HQ_K_c2372/f3p2/610	cystatin [Actinidia deliciosa]
		i1_HQ_K_c89045/f28p0/1097	PREDICTED: 1-aminocyclopropane-1-carboxylate oxidase 1 [Vitis vinifera]
		i1_HQ_K_c88949/f108p9/1149	PREDICTED: stem-specific protein TSJT1-like [Gossypium hirsutum]
		i0_HQ_K_c34228/f31p0/834	bet v 1 related allergen [Actinidia chinensis]
		i1_LQ_K_c59144/f1p2/1878	PREDICTED: beta-amyrin 28-oxidase-like [Sesamum indicum]
		i0_LQ_K_c33995/f4p0/684	late embryogenesis abundant protein 3L-1 [Camellia sinensis]
		i1_HQ_K_c11053/f7p1/1889	PREDICTED: fructose-bisphosphate aldolase cytoplasmic isozyme [Sesamum indicum]
		i1_LQ_K_c25976/f1p1/1662	PREDICTED: basic 7S globulin-like [Juglans regia]
		i1_LQ_K_c54217/f1p3/1208	glyceraldehyde-3-phosphate dehydrogenase C [Shorea beccariana]
		i1_HQ_K_c68292/f2p1/1158	PREDICTED: 1-aminocyclopropane-1-carboxylate oxidase 1 [Jatropha curcas]
		i0_HQ_K_c34342/f12p2/713	PREDICTED: protein EARLY RESPONSIVE TO DEHYDRATION 15-like [Ziziphus jujuba]
		i1_LQ_K_c36696/f1p1/1394	ADH2 [Actinidia deliciosa]
		i0_HQ_K_c34537/f2p1/481	putative cysteine proteinase inhibitor [Rumex obtusifolius]
		i1_HQ_K_c66928/f16p0/1180	PREDICTED: annexin D4 [Vitis vinifera]
		i0_HQ_K_c118/f14p0/744	PREDICTED: chaperone protein dnaJ 11, chloroplastic [Capsicum annuum]
		i2_HQ_K_c12396/f2p0/2985	sucrose synthase [Actinidia chinensis]
		i0_LQ_K_c4933/f1p0/799	putative cysteine proteinase inhibitor [Rumex obtusifolius]
		i0_LQ_K_c21137/f1p0/609	PREDICTED: major allergen Mal d 1-like [Sesamum indicum]
		i0_HQ_K_c17299/f11p0/736	bet v 1 related allergen [Actinidia deliciosa]
		i2_HQ_K_c170457/f41p2/2387	PREDICTED: stress response protein NST1 [Jatropha curcas]
		i2_LQ_K_c63557/f1p186/2936	sucrose synthase [Actinidia deliciosa]
		i1_LQ_K_c88084/f1p13/1632	fructose-bisphosphate aldolase 2 [Camellia oleifera]
		i2_HQ_K_c148393/f23p0/2257	PREDICTED: pyruvate decarboxylase 1 [Sesamum indicum]
		i0_HQ_K_c10093/f3p0/646	Mn/Fe superoxide dismutase [Tetradium ruticarpum]
		i1_LQ_K_c88258/f1p0/1915	PREDICTED: pyruvate kinase, cytosolic isozyme [Jatropha curcas]
		i1_HQ_K_c62606/f3p0/1100	xyloglucan endotransglucosylase/hydrolase 10 [Actinidia deliciosa]
		i1_LQ_K_c6611/f3p4/1759	ADH1 [Actinidia deliciosa]
		i1_LQ_K_c52802/f1p1/1635	PREDICTED: ATP-citrate synthase alpha chain protein 1 [Beta vulgaris subsp. vulgaris]
		i0_LQ_K_c34112/f1p0/535	PREDICTED: cysteine proteinase inhibitor-like [Ziziphus jujuba]
		i0_HQ_K_c17404/f9p0/940	PREDICTED: ADP-ribosylation factor 2 isoform X1 [Nicotiana tomentosiformis]
		i1_LQ_K_c39429/f1p0/1876	PREDICTED: S-adenosylmethionine synthase 2 [Ziziphus jujuba]
		i0_HQ_K_c17451/f8p0/611	PREDICTED: phytosulfokines 3 [Pyrus x bretschneideri]
		i0_HQ_K_c34302/f23p0/719	PREDICTED: 21 kDa protein [Pyrus x bretschneideri]
		i1_HQ_K_c68003/f14p0/1110	ethylene response factor 4 [Actinidia deliciosa]
		i0_HQ_K_c26198/f2p0/744	bet v 1 related allergen [Actinidia deliciosa]
		i1_LQ_K_c70323/f1p1/1890	PREDICTED: pectinesterase [Juglans regia]
		i0_HQ_K_c1213/f6p1/827	PREDICTED: stem-specific protein TSJT1 [Nicotiana tomentosiformis]
		i0_LQ_K_c19777/f1p0/724	bet v 1 related allergen [Actinidia deliciosa]
		i1_HQ_K_c87531/f6p0/1200	ethylene response factor 4 [Actinidia deliciosa]
		i2_HQ_K_c122139/f38p9/2100	PREDICTED: pyruvate kinase, cytosolic isozyme [Jatropha curcas]
		i0_LQ_K_c5437/f1p4/901	Universal stress protein A [Corchorus olitorius]
		i0_HQ_K_c2320/f5p2/653	Translation initiation factor 1A [Zostera marina]
		i2_LQ_K_c112614/f1p0/2175	#N/A
		i2_LQ_K_c72031/f1p0/2068	putative pyruvate decarboxylase 1, partial [Diospyros kaki]
		i1_LQ_K_c84263/f1p0/1039	PREDICTED: LOB domain-containing protein 41 [Sesamum indicum]
		i1_LQ_K_c12779/f1p0/1618	PREDICTED: epidermis-specific secreted glycoprotein EP1-like [Nelumbo nucifera]
		i1_HQ_K_c87279/f11p0/1772	PREDICTED: beta-amyrin 28-oxidase-like [Sesamum indicum]
		i0_LQ_K_c24187/f1p0/493	PREDICTED: cysteine proteinase inhibitor-like [Ziziphus jujuba]
		i1_HQ_K_c87844/f75p1/1282	PREDICTED: probable aldo-keto reductase 2 [Gossypium raimondii]
		i1_LQ_K_c78298/f1p0/1706	PREDICTED: diphosphomevalonate decarboxylase MVD2-like [Capsicum annuum]
		i0_HQ_K_c34260/f53p0/902	PREDICTED: protein EARLY RESPONSIVE TO DEHYDRATION 15-like [Daucus carota subsp. sativus]
		i0_HQ_K_c114/f17p0/741	bet v 1 related allergen [Actinidia deliciosa]
		i1_LQ_K_c74922/f1p0/1808	PREDICTED: lysine histidine transporter-like 8 [Theobroma cacao]
		i1_LQ_K_c62825/f1p0/1576	S-locus glycoprotein [Corchorus capsularis]
		i2_LQ_K_c136446/f1p1/2366	PREDICTED: ferredoxin--nitrite reductase, chloroplastic [Sesamum indicum]
		i0_HQ_K_c12135/f2p0/711	PREDICTED: universal stress protein A-like protein [Ricinus communis]
		i1_LQ_K_c16557/f1p0/1133	PREDICTED: probable calcium-binding protein CML49 [Solanum tuberosum]
		i2_LQ_K_c37924/f1p10/2211	acetyl-CoA C-acetyltransferase protein [Camellia oleifera]
		i1_HQ_K_c49284/f53p1/1329	PREDICTED: cysteine synthase [Vitis vinifera]
		i0_HQ_K_c17422/f3p0/706	bet v 1 related allergen [Actinidia deliciosa]
		i1_HQ_K_c23181/f2p0/1177	PREDICTED: protein BPS1, chloroplastic-like [Juglans regia]
		i2_HQ_K_c121769/f9p0/2288	PREDICTED: long chain acyl-CoA synthetase 1 [Solanum pennellii]
		i0_LQ_K_c33765/f6p0/470	PREDICTED: basic 7S globulin-like [Phoenix dactylifera]
		i0_HQ_K_c8346/f2p0/779	PREDICTED: zinc finger A20 and AN1 domain-containing stress-associated protein 4-like [Daucus carota subsp. sativus]
		i1_LQ_K_c82019/f2p0/1026	PREDICTED: LOB domain-containing protein 41 [Sesamum indicum]
		i1_HQ_K_c88489/f18p6/1644	PREDICTED: stress response protein NST1 [Vitis vinifera]
		i1_HQ_K_c88660/f43p0/1879	PREDICTED: pectinesterase [Juglans regia]
		i1_LQ_K_c36811/f1p6/1629	PREDICTED: UDP-glycosyltransferase 73C2 [Vitis vinifera]
		i1_LQ_K_c79396/f1p1/1504	glyceraldehyde-3-phosphate dehydrogenase C [Shorea beccariana]
		i2_LQ_K_c47291/f1p0/2219	Hydroxymethylglutaryl-CoA reductase, class I/II [Cynara cardunculus var. scolymus]
		i2_LQ_K_c61599/f1p0/2155	PDC1 [Actinidia deliciosa]
		i0_HQ_K_c16644/f11p0/649	PREDICTED: uncharacterized protein At2g27730, mitochondrial-like [Sesamum indicum]
		i1_HQ_K_c68382/f8p6/1056	isopentenyl diphosphate isomerase [Actinidia arguta]
		i1_HQ_K_c45677/f2p1/1030	PREDICTED: major allergen Mal d 1-like [Sesamum indicum]
		i1_LQ_K_c54987/f1p0/1279	glyceraldehyde-3-phosphate dehydrogenase C [Shorea beccariana]
		i0_HQ_K_c1448/f4p0/936	bet v 1 related allergen [Actinidia deliciosa]
		i1_HQ_K_c49246/f26p2/1916	UGP-glucose pyrophosphorylase [Actinidia eriantha]
		i1_LQ_K_c88395/f1p12/1842	RecName: Full=3-hydroxy-3-methylglutaryl-coenzyme A reductase; Short=HMG-CoA reductase
		i0_HQ_K_c33303/f12p0/683	Globin [Corchorus capsularis]
		i0_HQ_K_c977/f6p0/744	putative universal stress protein [Catharanthus roseus]
		i1_HQ_K_c1871/f7p3/1238	MYB transcription factor 1 [Camellia sinensis]
		i1_LQ_K_c51805/f1p0/1323	PREDICTED: UDP-glycosyltransferase 73C2 [Vitis vinifera]
		i1_HQ_K_c8157/f8p0/1187	PREDICTED: E3 ubiquitin-protein ligase RMA1H1 [Vitis vinifera]
		i2_HQ_K_c172491/f2p87/2328	PREDICTED: glutamate synthase 1 [NADH], chloroplastic isoform X1 [Vitis vinifera]
		i2_LQ_K_c107549/f1p2/2628	#N/A
		i2_LQ_K_c85773/f1p13/2283	3-hydroxy-3-methylglutaryl-CoA synthase [Camellia sinensis]
		i2_LQ_K_c95995/f1p0/2018	#N/A
		i4_HQ_K_c69181/f80p0/4724	PREDICTED: pleiotropic drug resistance protein 2-like [Sesamum indicum]
		i1_HQ_K_c87290/f20p0/1250	D-galacturonic acid reductase 1 [Actinidia deliciosa]
		i1_LQ_K_c40001/f1p2/1243	PREDICTED: stem-specific protein TSJT1-like [Nicotiana attenuata]
		i2_HQ_K_c123454/f103p0/2134	PREDICTED: 2,3-bisphosphoglycerate-independent phosphoglycerate mutase [Ziziphus jujuba]
		i1_HQ_K_c68060/f10p0/1148	ethylene response factor 4 [Actinidia deliciosa]
		i0_HQ_K_c2151/f3p6/865	PREDICTED: zinc finger A20 and AN1 domain-containing stress-associated protein 5-like [Nicotiana tabacum]
		i1_LQ_K_c68121/f11p1/1342	PREDICTED: peroxidase 73 [Eucalyptus grandis]
		i0_HQ_K_c737/f10p0/990	PREDICTED: LOB domain-containing protein 41 [Sesamum indicum]
		i2_HQ_K_c172661/f245p15/2470	PREDICTED: stress response protein NST1 [Vitis vinifera]
		i1_HQ_K_c87836/f4p1/1168	PREDICTED: protein GDAP2 homolog [Nelumbo nucifera]
		i5_LQ_K_c6230/f1p2/5065	#N/A
		i1_LQ_K_c48139/f1p0/1034	ethylene response factor 4 [Actinidia deliciosa]
		i2_LQ_K_c53686/f1p0/2191	PDC1 [Actinidia deliciosa]
		i2_HQ_K_c99111/f3p1/2961	sucrose synthase [Actinidia deliciosa]
		i2_LQ_K_c58694/f1p4/2180	PREDICTED: pyruvate decarboxylase 1 [Sesamum indicum]
		i1_LQ_K_c14090/f1p1/1743	Mn/Fe superoxide dismutase [Tetradium ruticarpum]
		i2_HQ_K_c171325/f20p0/2198	alanine aminotransferase 1 [Camellia sinensis]
		i1_HQ_K_c63061/f2p0/1082	PREDICTED: chaperone protein dnaJ 20, chloroplastic-like isoform X1 [Nelumbo nucifera]
		i0_HQ_K_c34333/f13p0/885	PREDICTED: zinc finger protein ZAT10 [Vitis vinifera]
		i2_LQ_K_c47420/f1p21/2269	ADH1 [Actinidia deliciosa]
		i1_HQ_K_c25046/f2p0/1700	PREDICTED: ferredoxin--nitrite reductase, chloroplastic [Sesamum indicum]
		i1_LQ_K_c77636/f1p3/1785	glyceraldehyde-3-phosphate dehydrogenase C [Shorea beccariana]
		i1_LQ_K_c83251/f1p0/1027	PREDICTED: chaperone protein dnaJ 20, chloroplastic-like isoform X1 [Nelumbo nucifera]
		i0_HQ_K_c33223/f15p0/938	embryo-abundant family protein [Populus trichocarpa]
		i2_HQ_K_c170823/f23p8/2171	PREDICTED: pyruvate kinase, cytosolic isozyme [Jatropha curcas]
		i1_LQ_K_c72626/f1p5/1431	glyceraldehyde-3-phosphate dehydrogenase C [Shorea beccariana]
		i1_HQ_K_c88881/f33p1/1489	Glyceraldehyde-3-phosphate dehydrogenase, cytosolic [Glycine soja]
		i2_HQ_K_c148894/f10p2/2812	PREDICTED: pyrophosphate-energized vacuolar membrane proton pump 1-like [Nicotiana tabacum]
		i1_LQ_K_c77625/f1p1/1941	PREDICTED: cytochrome P450 714C2 [Eucalyptus grandis]
		i1_LQ_K_c38366/f1p3/1686	PREDICTED: cytochrome P450 CYP72A219-like [Sesamum indicum]
		i0_HQ_K_c30193/f2p16/948	PREDICTED: dehydrin COR410 [Elaeis guineensis]
		i1_LQ_K_c31136/f1p1/1034	PREDICTED: protein YLS9-like [Juglans regia]
		i0_HQ_K_c5352/f2p0/969	ethylene response factor 4 [Actinidia deliciosa]
		i1_HQ_K_c33410/f3p0/1449	PREDICTED: 1-aminocyclopropane-1-carboxylate oxidase homolog 1-like [Sesamum indicum]
		i1_HQ_K_c87860/f71p0/1719	PREDICTED: nematode resistance protein-like HSPRO2 [Nicotiana attenuata]
		i0_HQ_K_c33242/f7p1/697	PREDICTED: protein yippee-like At4g27745 [Nelumbo nucifera]
		i1_HQ_K_c2303/f3p1/1447	PREDICTED: probable prolyl 4-hydroxylase 6 [Nelumbo nucifera]
		i0_HQ_K_c13634/f3p0/594	PREDICTED: auxin-responsive protein SAUR72-like [Ziziphus jujuba]
		i1_LQ_K_c36340/f1p0/1305	D-galacturonic acid reductase 1 [Actinidia deliciosa]
		i1_LQ_K_c50140/f1p0/1472	ADH1 [Actinidia deliciosa]
		i0_LQ_K_c29147/f1p0/965	Universal stress protein A-like protein [Morus notabilis]
		i1_HQ_K_c88794/f43p5/1829	glutamate decarboxylase 2 [Camellia sinensis]
		i2_HQ_K_c171798/f2p2/2682	PREDICTED: dammarenediol II synthase-like [Sesamum indicum]
		i2_HQ_K_c35601/f3p0/2295	Cellular retinaldehyde binding/alpha-tocopherol transport [Corchorus olitorius]
		i2_HQ_K_c36238/f3p1/2124	PREDICTED: ATP-citrate synthase beta chain protein 2 [Ricinus communis]
		i0_HQ_K_c33327/f2p0/846	LRR_1 domain-containing protein/LRRNT_2 domain-containing protein/LRR_8 domain-containing protein [Cephalotus follicularis]
		i2_LQ_K_c26809/f1p0/2865	sucrose synthase [Actinidia chinensis]
		i1_HQ_K_c7240/f4p0/1511	PREDICTED: copper-transporting ATPase 2 [Amborella trichopoda]
		i1_LQ_K_c59483/f1p2/1410	PREDICTED: F-box/kelch-repeat protein At1g15670-like [Nicotiana tomentosiformis]
		i2_HQ_K_c28464/f7p4/2914	lipoxygenase [Camellia sinensis]
		i1_LQ_K_c53707/f1p1/1256	hypothetical protein glysoja_002898 [Glycine soja]
		i1_HQ_K_c69624/f2p2/1260	fructokinase [Actinidia chinensis]
		i1_LQ_K_c7342/f1p10/1778	pyruvate kinase [Diospyros kaki]
		i1_HQ_K_c54506/f2p0/1731	PREDICTED: beta-amyrin 28-oxidase-like [Sesamum indicum]
		i3_LQ_K_c25882/f1p0/3335	#N/A
		i1_LQ_K_c44074/f1p1/1657	PREDICTED: S-adenosylmethionine synthase 1 [Ricinus communis]
		i0_HQ_K_c2078/f2p3/955	PREDICTED: zinc finger protein ZAT10 [Nelumbo nucifera]
		i0_HQ_K_c1772/f4p0/598	snakin-2 [Capsicum annuum]
		i1_HQ_K_c1321/f9p5/1282	PREDICTED: plant cysteine oxidase 1-like isoform X1 [Juglans regia]
		i1_LQ_K_c72219/f1p0/1509	Cytochrome P450 [Theobroma cacao]
		i1_LQ_K_c95833/f1p3/1019	PREDICTED: universal stress protein A-like protein [Ziziphus jujuba]
		i2_HQ_K_c36404/f9p5/2655	PREDICTED: probable aldo-keto reductase 2 [Gossypium raimondii]
		i1_HQ_K_c29567/f3p1/1057	ethylene response factor 7 [Actinidia deliciosa]
		i0_LQ_K_c23272/f1p1/726	hypothetical protein CFOL_v3_00150 [Cephalotus follicularis]
		i0_HQ_K_c2194/f3p0/857	PREDICTED: probable calcium-binding protein CML35 [Vitis vinifera]
		i1_LQ_K_c40620/f1p10/1155	PREDICTED: isopentenyl-diphosphate Delta-isomerase I [Nicotiana tomentosiformis]
		i1_HQ_K_c87512/f6p1/1214	Gly-zipper_Omp domain-containing protein/zf-RING_2 domain-containing protein [Cephalotus follicularis]
		i1_LQ_K_c26372/f1p0/1852	PREDICTED: squalene monooxygenase-like [Ziziphus jujuba]
		i0_HQ_K_c2628/f2p0/711	PREDICTED: universal stress protein PHOS34 [Eucalyptus grandis]
		i1_LQ_K_c84128/f1p6/1082	6-phosphogluconolactonase, DevB-type [Corchorus capsularis]
		i0_HQ_K_c33565/f3p0/796	hypothetical protein PRUPE_ppa011784mg [Prunus persica]
		i1_LQ_K_c16472/f1p1/1029	PREDICTED: polyubiquitin-like [Capsicum annuum]
		i4_LQ_K_c48514/f1p0/4493	#N/A
		i1_HQ_K_c36309/f2p0/1472	ethylene response factor 7 [Actinidia deliciosa]
		i1_LQ_K_c23343/f1p5/1184	PREDICTED: CCG-binding protein 1 [Nicotiana attenuata]
		i0_LQ_K_c7967/f1p0/929	glycine-rich family protein [Populus trichocarpa]
		i1_LQ_K_c7014/f3p30/1600	PREDICTED: F-box/kelch-repeat protein At1g80440 [Vitis vinifera]
		i2_HQ_K_c1495/f4p3/2209	PDC1 [Actinidia deliciosa]
		i1_HQ_K_c81301/f3p2/1048	ethylene response factor 7 [Actinidia deliciosa]
		i1_HQ_K_c66919/f14p0/1831	PREDICTED: lysine histidine transporter 1-like [Sesamum indicum]
		i1_HQ_K_c410/f17p3/1857	PREDICTED: cytochrome P450 714C2-like [Juglans regia]
		i1_LQ_K_c38989/f1p1/1152	Glutamine amidotransferase type 1 [Corchorus capsularis]
		i1_LQ_K_c28100/f1p0/1811	PREDICTED: beta-amyrin 28-oxidase-like [Sesamum indicum]
		i1_HQ_K_c20151/f3p2/1733	PREDICTED: E3 ubiquitin-protein ligase RGLG2-like [Sesamum indicum]
		i2_HQ_K_c1654/f6p14/2849	PREDICTED: beta-amyrin 28-oxidase-like [Juglans regia]
		i0_LQ_K_c2620/f2p0/984	PREDICTED: abscisic acid receptor PYL9-like [Fragaria vesca subsp. vesca]
		i1_LQ_K_c24395/f1p2/1588	S-locus glycoprotein [Corchorus capsularis]
		i1_LQ_K_c27003/f1p2/1574	PREDICTED: NDR1/HIN1-like protein 12 [Pyrus x bretschneideri]
		i1_LQ_K_c60267/f1p3/1860	PAE [Litchi chinensis]
		i1_LQ_K_c8233/f1p0/1457	PREDICTED: beta-amyrin 28-oxidase-like [Erythranthe guttata]
		i2_HQ_K_c125853/f2p0/2393	Cellular retinaldehyde binding/alpha-tocopherol transport [Corchorus capsularis]
		i0_HQ_K_c18635/f2p0/887	PREDICTED: translationally-controlled tumor protein homolog [Vitis vinifera]
		i1_HQ_K_c10258/f2p4/1191	PREDICTED: 1-aminocyclopropane-1-carboxylate oxidase 1 [Jatropha curcas]
		i2_HQ_K_c53061/f36p6/2326	PREDICTED: probable cysteine desulfurase [Nicotiana tabacum]
		i1_LQ_K_c6677/f1p5/1285	6-phosphogluconolactonase, DevB-type [Corchorus capsularis]
		i0_LQ_K_c7482/f1p1/872	E3 ubiquitin-protein ligase, partial [Betula luminifera]
		i1_LQ_K_c21324/f1p3/1484	PREDICTED: cysteine synthase [Vitis vinifera]
		i2_HQ_K_c9043/f2p1/2399	PREDICTED: cysteine-rich receptor-like protein kinase 2 isoform X1 [Vitis vinifera]
		i1_HQ_K_c49273/f7p0/1675	PREDICTED: beta-amyrin 28-oxidase [Theobroma cacao]
		i2_HQ_K_c139631/f3p0/2318	Cellular retinaldehyde binding/alpha-tocopherol transport [Corchorus olitorius]
		i1_LQ_K_c9585/f1p0/1672	PREDICTED: glutamate--tRNA ligase, cytoplasmic-like [Gossypium arboreum]
		i0_HQ_K_c1807/f5p0/922	PREDICTED: universal stress protein A-like protein [Ricinus communis]
		i1_HQ_K_c87299/f12p1/1697	fructose-bisphosphate aldolase 2 [Camellia oleifera]
		i2_HQ_K_c176120/f2p1/2773	PREDICTED: dammarenediol II synthase-like [Sesamum indicum]
		i2_LQ_K_c4521/f1p9/2334	acetyl-CoA C-acetyltransferase protein [Camellia oleifera]
		i0_HQ_K_c13332/f4p5/788	PREDICTED: SUMO-conjugating enzyme SCE1 [Ziziphus jujuba]
		i1_HQ_K_c28632/f6p5/1862	UGP-glucose pyrophosphorylase [Actinidia eriantha]
		i2_HQ_K_c170361/f3p1/2119	pyruvate kinase [Diospyros kaki]
		i2_LQ_K_c43048/f1p0/2730	PREDICTED: dammarenediol II synthase-like [Sesamum indicum]
		i1_LQ_K_c77527/f1p2/1581	ethylene response factor 5 [Actinidia deliciosa]
		i1_LQ_K_c5247/f1p1/1815	PREDICTED: molybdate-anion transporter-like [Tarenaya hassleriana]
		i1_HQ_K_c87044/f2p5/1144	PREDICTED: homeobox-leucine zipper protein HAT22-like [Ipomoea nil]
		i2_HQ_K_c97549/f50p0/2828	PREDICTED: pyrophosphate-energized vacuolar membrane proton pump 1-like [Nicotiana tabacum]
		i1_HQ_K_c18188/f4p0/1889	hexose transport protein [Actinidia deliciosa]
		i2_LQ_K_c63659/f1p1/2409	PREDICTED: acyl-CoA--sterol O-acyltransferase 1 [Vitis vinifera]
		i1_HQ_K_c87799/f19p0/1742	PREDICTED: polyadenylate-binding protein RBP47-like [Ziziphus jujuba]
		i0_LQ_K_c26727/f1p0/711	PREDICTED: translationally-controlled tumor protein homolog [Ipomoea nil]
		i2_LQ_K_c41898/f1p3/2268	#N/A
		i0_HQ_K_c34275/f12p0/525	PREDICTED: ubiquitin-conjugating enzyme E2 2 [Beta vulgaris subsp. vulgaris]
		i1_HQ_K_c990/f7p0/1683	PREDICTED: aspartate aminotransferase, cytoplasmic [Juglans regia]
		i1_HQ_K_c57579/f3p0/1793	PREDICTED: beta-amyrin 28-oxidase-like [Sesamum indicum]
		i2_HQ_K_c1641/f18p18/2143	PREDICTED: beta-amyrin 28-oxidase-like [Sesamum indicum]
		i1_LQ_K_c35778/f1p0/1828	PREDICTED: beta-amyrin 28-oxidase [Theobroma cacao]
		i1_HQ_K_c87966/f18p3/1437	PREDICTED: E3 ubiquitin-protein ligase MIEL1-like isoform X3 [Ziziphus jujuba]
		i1_LQ_K_c18343/f2p0/1514	PREDICTED: LOB domain-containing protein 41 [Sesamum indicum]
		i2_LQ_K_c70269/f1p11/1856	PREDICTED: beta-amyrin 28-oxidase-like [Sesamum indicum]
		i1_LQ_K_c39892/f1p1/1624	PREDICTED: peroxidase 73-like [Gossypium raimondii]
		i0_HQ_K_c8911/f2p2/555	PREDICTED: putative nuclease HARBI1 isoform X2 [Eucalyptus grandis]
		i0_HQ_K_c18481/f2p0/634	hypothetical protein L484_001734 [Morus notabilis]
		i1_LQ_K_c72438/f1p0/1555	PREDICTED: aspartate aminotransferase, cytoplasmic [Theobroma cacao]
		i1_HQ_K_c87414/f49p3/1576	stearoy-l ACP desaturase [Camellia oleifera]
		i1_LQ_K_c35284/f1p4/1760	PREDICTED: stress response protein NST1 [Vitis vinifera]
		i1_HQ_K_c32015/f21p4/1173	PREDICTED: sphinganine C4-monooxygenase 1 [Vitis vinifera]
		i1_LQ_K_c15961/f1p1/1119	Haloacid dehalogenase-like hydrolase domain-containing protein 3 [Morus notabilis]
		i1_LQ_K_c14183/f1p5/1390	stearoy-l ACP desaturase [Camellia oleifera]
		i1_LQ_K_c15761/f1p5/1077	PREDICTED: calmodulin-binding protein 25-like [Daucus carota subsp. sativus]
		i2_LQ_K_c87095/f1p26/1653	ADH1 [Actinidia deliciosa]
		i1_HQ_K_c68023/f19p0/1854	PREDICTED: protein SRC2 homolog [Vitis vinifera]
		i1_LQ_K_c77361/f1p1/1481	PREDICTED: heavy metal-associated isoprenylated plant protein 3-like [Gossypium arboreum]
		i0_HQ_K_c2212/f8p0/986	PREDICTED: auxin-responsive protein SAUR40 [Theobroma cacao]
		i1_LQ_K_c45026/f5p1/1077	hypothetical protein MANES_07G116700 [Manihot esculenta]
		i1_HQ_K_c24831/f2p0/1819	PREDICTED: beta-amyrin 28-oxidase-like [Sesamum indicum]
		i2_LQ_K_c126936/f1p5/2095	#N/A
		i1_LQ_K_c13824/f1p0/1580	PREDICTED: AP2/ERF and B3 domain-containing transcription factor RAV1-like isoform X2 [Ziziphus jujuba]
		i2_HQ_K_c148694/f50p10/2276	PREDICTED: nucleolin 2 isoform X2 [Vitis vinifera]
		i0_HQ_K_c2070/f2p17/850	E3 ubiquitin-protein ligase, partial [Betula luminifera]
		i1_HQ_K_c1736/f4p1/1567	PREDICTED: transcription factor bHLH128-like [Juglans regia]
		i2_LQ_K_c183434/f1p2/2006	PREDICTED: UDP-glycosyltransferase 73C2 [Vitis vinifera]
		i1_LQ_K_c21326/f1p3/1814	PREDICTED: diphosphomevalonate decarboxylase MVD2 [Ipomoea nil]
		i2_HQ_K_c99255/f13p0/2772	PREDICTED: dammarenediol II synthase-like [Sesamum indicum]
		i1_HQ_K_c17847/f5p0/1403	Trichome birefringence-like 37 isoform 1 [Theobroma cacao]
		i0_HQ_K_c18564/f2p3/908	PREDICTED: structural maintenance of chromosomes protein 1A [Sesamum indicum]
		i0_HQ_K_c18154/f2p0/644	PREDICTED: glutaredoxin-C9 [Vitis vinifera]
		i3_HQ_K_c34105/f3p0/3172	PREDICTED: S-adenosylmethionine synthase 2 [Ziziphus jujuba]
		i1_LQ_K_c63389/f1p0/1062	PREDICTED: plant cysteine oxidase 1-like isoform X1 [Juglans regia]
		i0_HQ_K_c2339/f3p0/993	B-cell receptor-associated 31-like protein [Cynara cardunculus var. scolymus]
		i2_LQ_K_c135236/f1p29/2482	#N/A
		i1_HQ_K_c2268/f9p1/1502	PREDICTED: lysM domain-containing GPI-anchored protein 2 [Sesamum indicum]
		i0_LQ_K_c5355/f1p2/972	PREDICTED: vesicle-associated membrane protein 722 [Juglans regia]
		i2_LQ_K_c94519/f1p14/2036	PREDICTED: beta-amyrin 28-oxidase-like [Sesamum indicum]
		i1_LQ_K_c2748/f1p2/1660	PREDICTED: cytochrome P450 714C2 [Eucalyptus grandis]
		i1_LQ_K_c2779/f1p5/1995	D-galacturonic acid reductase 1 [Actinidia deliciosa]
		i0_HQ_K_c16886/f10p0/874	PREDICTED: adenylylsulfatase HINT3 [Vitis vinifera]
		i1_HQ_K_c18743/f2p1/1243	xyloglucan endotransglucosylase/hydrolase 10 [Actinidia deliciosa]
		i1_LQ_K_c34742/f1p2/1964	PREDICTED: F-box/kelch-repeat protein At1g80440 [Vitis vinifera]
		i1_LQ_K_c85082/f1p0/1040	PREDICTED: 1-aminocyclopropane-1-carboxylate oxidase homolog 1-like [Sesamum indicum]
		i1_LQ_K_c31490/f1p0/1048	xyloglucan endotransglucosylase/hydrolase 10 [Actinidia deliciosa]
		i1_HQ_K_c68772/f3p1/1556	PREDICTED: phosphoglycerate kinase, cytosolic [Gossypium arboreum]
		i1_HQ_K_c18048/f5p0/1358	cinnamyl alcohol dehydrogenase [Ocimum tenuiflorum]
		i2_HQ_K_c147406/f9p9/2032	PREDICTED: LOB domain-containing protein 41 [Sesamum indicum]
		i1_HQ_K_c5186/f2p12/1255	PREDICTED: probable prolyl 4-hydroxylase 10 [Solanum tuberosum]
		i1_LQ_K_c74797/f1p0/1477	PREDICTED: heterogeneous nuclear ribonucleoprotein A/B-like [Arachis duranensis]
		i2_LQ_K_c129035/f1p10/2374	#N/A
		i1_HQ_K_c81618/f3p2/1065	PREDICTED: LOB domain-containing protein 41 [Sesamum indicum]
		i1_LQ_K_c87680/f11p6/1355	PREDICTED: mitochondrial dicarboxylate/tricarboxylate transporter DTC [Sesamum indicum]
		i2_LQ_K_c102858/f1p6/2092	#N/A
		i1_HQ_K_c45533/f2p0/1033	PREDICTED: expansin-like B1 [Populus euphratica]
		i1_LQ_K_c71346/f1p0/1241	PREDICTED: F-box/kelch-repeat protein At1g15670-like [Nicotiana tabacum]
		i1_HQ_K_c1507/f15p0/1619	PREDICTED: 26S protease regulatory subunit 8 homolog A-like [Nelumbo nucifera]
		i1_LQ_K_c60348/f1p0/1980	ethylene response factor 5 [Actinidia deliciosa]
		i1_HQ_K_c58984/f2p18/1296	Calcium-dependent lipid-binding family protein isoform 1 [Theobroma cacao]
		i2_HQ_K_c149630/f2p2/2368	Cellular retinaldehyde binding/alpha-tocopherol transport [Corchorus capsularis]
		i1_HQ_K_c1639/f5p3/1786	PREDICTED: protein SRC2 homolog [Vitis vinifera]
		i1_LQ_K_c73916/f1p1/1167	Haloacid dehalogenase-like hydrolase domain-containing protein 3 [Morus notabilis]
		i1_HQ_K_c51670/f2p0/1706	PREDICTED: basic 7S globulin [Eucalyptus grandis]
		i1_HQ_K_c32052/f22p0/1990	beta-fructofuranosidase [Actinidia chinensis]
		i1_HQ_K_c1426/f7p1/1449	gibberellin 2 oxidase 1 [Camellia lipoensis]
		i1_HQ_K_c88560/f4p0/1107	ethylene response factor 4 [Actinidia deliciosa]
		i1_HQ_K_c21557/f4p1/1709	fructose-bisphosphate aldolase 2 [Camellia oleifera]
		i1_HQ_K_c14140/f5p5/1465	PREDICTED: basic 7S globulin [Vitis vinifera]
		i2_HQ_K_c87133/f3p2/2147	PREDICTED: protein EARLY RESPONSIVE TO DEHYDRATION 15-like [Daucus carota subsp. sativus]
		i1_HQ_K_c68527/f7p1/1556	PREDICTED: fructose-bisphosphate aldolase 1, cytoplasmic [Nelumbo nucifera]
		i0_LQ_K_c3027/f1p0/827	PREDICTED: LOB domain-containing protein 41 [Sesamum indicum]
		i1_HQ_K_c2243/f9p2/1372	PREDICTED: zinc finger CCCH domain-containing protein 20 [Nicotiana attenuata]
		i2_LQ_K_c64636/f1p1/2607	PREDICTED: ferredoxin--nitrite reductase, chloroplastic isoform X1 [Daucus carota subsp. sativus]
		i1_LQ_K_c19300/f1p2/2010	PREDICTED: cytochrome P450 714C2-like [Juglans regia]
		i1_HQ_K_c86866/f11p1/1485	PREDICTED: ATP-citrate synthase alpha chain protein 1 [Theobroma cacao]
		i1_HQ_K_c27678/f2p11/1808	PREDICTED: oxygen-dependent coproporphyrinogen-III oxidase, chloroplastic [Citrus sinensis]
		i1_LQ_K_c40942/f1p5/1944	ADP glucose pyrophosphorylase [Actinidia chinensis]
		i0_HQ_K_c1264/f9p3/733	PREDICTED: metallothiol transferase FosB-like [Daucus carota subsp. sativus]
		i1_HQ_K_c87882/f12p4/1550	AAA+ ATPase domain-containing protein [Cynara cardunculus var. scolymus]
		i1_LQ_K_c57759/f1p3/1413	glyceraldehyde-3-phosphate dehydrogenase C [Shorea beccariana]
		i0_HQ_K_c14230/f2p0/792	PREDICTED: glutaredoxin-C9 [Vitis vinifera]
		i2_HQ_K_c79118/f2p3/2359	PREDICTED: beta-glucosidase BoGH3B-like isoform X1 [Prunus mume]
		i2_LQ_K_c160183/f1p14/1872	PREDICTED: lysine histidine transporter-like 8 [Erythranthe guttata]
		i1_LQ_K_c19385/f1p1/1775	PREDICTED: 26S proteasome regulatory subunit 4 homolog A-like [Arachis ipaensis]
		i1_LQ_K_c38328/f1p121/1503	Glutamate synthase [NADH] [Morus notabilis]
		i1_LQ_K_c22342/f1p1/1764	DUF581 domain-containing protein [Cephalotus follicularis]
		i1_LQ_K_c21151/f1p0/1898	PREDICTED: cytochrome P450 714C2-like [Juglans regia]
		i1_LQ_K_c43685/f1p5/1953	hexokinase [Actinidia chinensis]
		i0_HQ_K_c6899/f2p0/730	bet v 1 related allergen [Actinidia deliciosa]
		i2_HQ_K_c170961/f16p2/2565	PREDICTED: E3 ubiquitin protein ligase RIN2 [Vitis vinifera]
		i2_LQ_K_c66423/f1p15/2236	PREDICTED: cytochrome P450 714C2-like [Juglans regia]
		i2_LQ_K_c15932/f1p10/2074	#N/A
		i1_LQ_K_c2679/f4p19/1642	PREDICTED: phosphoribulokinase, chloroplastic-like [Nelumbo nucifera]
		i2_HQ_K_c172400/f75p6/2342	Citrate synthase-like protein [Corchorus olitorius]
		i1_LQ_K_c861/f9p2/1351	PREDICTED: zinc finger CCCH domain-containing protein 20 [Nicotiana attenuata]
		i1_LQ_K_c30024/f1p0/1013	PREDICTED: zinc finger A20 and AN1 domain-containing stress-associated protein 5-like [Ipomoea nil]
		i3_LQ_K_c16712/f1p0/3064	#N/A
		i2_HQ_K_c31784/f2p2/2031	PREDICTED: squalene monooxygenase [Vitis vinifera]
		i1_HQ_K_c89704/f8p2/1737	GDH2 [Actinidia chinensis]
		i1_HQ_K_c87929/f16p3/1833	glutamate decarboxylase 2 [Camellia sinensis]
		i4_HQ_K_c48867/f2p0/4569	PREDICTED: LOW QUALITY PROTEIN: pleiotropic drug resistance protein 2-like [Sesamum indicum]
		i2_HQ_K_c62824/f2p2/2190	PREDICTED: cytochrome P450 CYP72A219-like [Solanum tuberosum]
		i2_LQ_K_c129561/f1p4/2133	#N/A
		i1_HQ_K_c81809/f2p0/1095	Ethylene-responsive transcription factor 1A [Cajanus cajan]
		i0_HQ_K_c21851/f2p0/897	LRR_1 domain-containing protein/LRRNT_2 domain-containing protein/LRR_8 domain-containing protein [Cephalotus follicularis]
		i1_HQ_K_c12783/f3p0/1228	Aluminum induced protein with YGL and LRDR motifs [Theobroma cacao]
		i1_HQ_K_c88154/f3p8/1761	PREDICTED: shaggy-related protein kinase alpha isoform X1 [Vitis vinifera]
		i1_HQ_K_c69940/f2p1/1568	PREDICTED: transmembrane protein 45B-like [Juglans regia]
		i1_LQ_K_c16533/f1p0/1050	PREDICTED: cell number regulator 8 [Vitis vinifera]
		i2_LQ_K_c132787/f1p5/2083	G6PD1 [Actinidia chinensis]
		i2_HQ_K_c146596/f8p24/2358	PREDICTED: pectinesterase [Juglans regia]
		i1_LQ_K_c41102/f1p11/1509	PAE [Litchi chinensis]
		i1_HQ_K_c62665/f3p6/1034	PREDICTED: reticulon-like protein B8 [Nicotiana tabacum]
		i2_LQ_K_c46554/f1p1/2674	Globin [Corchorus capsularis]
		i1_HQ_K_c5158/f2p3/1776	PREDICTED: patatin-like protein 2 [Pyrus x bretschneideri]
		i1_LQ_K_c20469/f1p15/1578	acetyl-CoA C-acetyltransferase [Camellia chekiangoleosa]
		i2_LQ_K_c153004/f1p0/2089	PREDICTED: cysteine-rich receptor-like protein kinase 2 [Daucus carota subsp. sativus]
		i2_HQ_K_c121802/f4p0/2336	PREDICTED: cysteine-rich receptor-like protein kinase 2 [Daucus carota subsp. sativus]
		i1_LQ_K_c16185/f1p4/1112	PREDICTED: vacuolar protein sorting-associated protein 32 homolog 2 [Nicotiana tomentosiformis]
		i1_HQ_K_c67065/f4p1/1503	PREDICTED: protein disulfide-isomerase like 2-1-like [Sesamum indicum]
		i1_LQ_K_c21821/f1p1/1685	PREDICTED: lysine histidine transporter-like 8 [Theobroma cacao]
		i1_HQ_K_c40996/f3p1/1219	PREDICTED: choline-phosphate cytidylyltransferase 2 [Cucumis sativus]
		i2_LQ_K_c110199/f1p2/2280	#N/A
		i0_HQ_K_c11950/f2p0/896	PREDICTED: translationally-controlled tumor protein homolog [Ipomoea nil]
		i2_LQ_K_c81848/f1p2/2442	NADPH-cytochrome P450 reductase [Camptotheca acuminata]
		i1_HQ_K_c14263/f2p0/1484	PREDICTED: protein trichome birefringence-like 38 [Jatropha curcas]
		i4_LQ_K_c23039/f1p4/4773	#N/A
		i1_HQ_K_c89371/f2p0/1834	PREDICTED: protein SRC2 homolog [Vitis vinifera]
		i1_LQ_K_c33798/f2p0/1190	nam-like protein [Camellia sinensis]
		i2_LQ_K_c85173/f1p2/2709	mixed amyrin synthase [Olea europaea]
		i1_HQ_K_c1588/f2p1/1799	PREDICTED: pectin acetylesterase 8-like isoform X2 [Solanum lycopersicum]
		i2_LQ_K_c145880/f1p3/2079	PREDICTED: uncharacterized protein LOC109011949 [Juglans regia]
		i0_HQ_K_c2164/f2p0/875	PREDICTED: GTP-binding protein YPTM2 [Ricinus communis]
		i2_HQ_K_c26201/f5p2/2498	Kinase superfamily protein [Theobroma cacao]
		i3_HQ_K_c44244/f38p0/3574	PREDICTED: LOW QUALITY PROTEIN: receptor-like protein kinase HSL1 [Sesamum indicum]
		i1_HQ_K_c971/f5p0/1572	stearoy-l ACP desaturase [Camellia oleifera]
		i1_HQ_K_c2465/f6p5/1464	PREDICTED: F-box/kelch-repeat protein At1g80440 [Vitis vinifera]
		i2_LQ_K_c158930/f1p6/2185	PREDICTED: protein SRC2 homolog [Vitis vinifera]
		i2_LQ_K_c7322/f1p19/2855	PREDICTED: universal stress protein A-like protein [Ziziphus jujuba]
		i1_LQ_K_c83303/f1p0/1022	PREDICTED: E3 ubiquitin-protein ligase RMA1H1 [Ziziphus jujuba]
		i1_LQ_K_c86881/f1p6/1269	xyloglucan endotransglucosylase/hydrolase 10 [Actinidia deliciosa]
		i1_LQ_K_c37994/f2p3/1169	MYB transcription factor 1 [Camellia sinensis]
		i1_LQ_K_c59495/f1p1/1163	PREDICTED: reticulon-like protein B5 [Nicotiana sylvestris]
		i1_HQ_K_c87668/f11p1/1851	PREDICTED: cytochrome P450 714C2-like [Juglans regia]
		i2_LQ_K_c105831/f1p5/2191	#N/A
		i1_HQ_K_c87739/f2p2/1205	PREDICTED: vesicle-associated protein 4-2-like [Daucus carota subsp. sativus]
		i1_HQ_K_c20197/f3p2/1773	PREDICTED: tubulin alpha-3 chain [Brassica napus]
		i2_LQ_K_c42455/f1p1/2134	#N/A
		i0_HQ_K_c1601/f3p0/971	PREDICTED: putative GEM-like protein 8 [Prunus mume]
		i2_LQ_K_c13217/f1p10/2892	PREDICTED: dammarenediol II synthase-like [Sesamum indicum]
		i0_LQ_K_c4953/f1p0/901	PREDICTED: pleckstrin homology domain-containing protein 1 [Sesamum indicum]
		i1_HQ_K_c43734/f2p3/1468	PREDICTED: secretory carrier-associated membrane protein 3 [Citrus sinensis]
		i1_LQ_K_c27457/f1p2/1238	RecName: Full=Carboxylesterase 1; Short=AeCXE1
		i1_HQ_K_c40236/f3p8/1552	PREDICTED: pyruvate dehydrogenase E1 component subunit beta-1, mitochondrial-like [Juglans regia]
		i2_LQ_K_c82159/f1p6/2230	PREDICTED: stress response protein NST1 [Vitis vinifera]
		i1_LQ_K_c52824/f1p2/1663	GDH2 [Actinidia chinensis]
		i2_HQ_K_c1982/f12p6/2237	squalene epoxidase [Morus alba]
		i2_LQ_K_c30527/f1p3/2764	stearoy-l ACP desaturase [Camellia oleifera]
		i1_LQ_K_c24520/f1p1/1912	uricase [Lotus japonicus]
		i1_HQ_K_c55131/f3p0/1631	nucleotide/sugar transporter family protein [Medicago truncatula]
		i1_LQ_K_c46419/f1p0/1159	PREDICTED: protein BPS1, chloroplastic-like [Vitis vinifera]
		i3_HQ_K_c11875/f4p1/3335	PREDICTED: ABC transporter A family member 2-like isoform X2 [Prunus mume]
		i0_HQ_K_c2348/f4p0/674	PREDICTED: transmembrane protein 230 [Fragaria vesca subsp. vesca]
		i1_LQ_K_c57252/f1p1/1466	MYB transcription factor 1 [Camellia sinensis]
		i2_LQ_K_c66089/f1p2/2373	PREDICTED: pyrophosphate-energized vacuolar membrane proton pump 1-like [Solanum tuberosum]
		i0_HQ_K_c33658/f20p2/667	late embryogenesis abundant protein 3L-1 [Camellia sinensis]
		i1_LQ_K_c70474/f1p1/1653	Glutamate-1-semialdehyde 2,1-aminomutase 2, chloroplastic -like protein [Gossypium arboreum]
		i1_LQ_K_c34195/f1p1/2087	PREDICTED: cytochrome P450 714C2-like [Juglans regia]
		i1_HQ_K_c87025/f2p4/1488	PREDICTED: mevalonate kinase [Jatropha curcas]
		i0_HQ_K_c14365/f3p2/768	PREDICTED: histone H1-like [Nelumbo nucifera]
		i1_LQ_K_c18830/f1p1/1549	PREDICTED: CBS domain-containing protein CBSX5-like [Solanum pennellii]
		i1_LQ_K_c31197/f1p2/1094	PREDICTED: carbonic anhydrase 2-like isoform X2 [Nicotiana attenuata]
		i0_LQ_K_c28726/f1p0/1003	carbonyl reductase-like [Solanum lycopersicum]
		i1_HQ_K_c69930/f2p2/1739	PREDICTED: arabinosyltransferase RRA3-like [Nelumbo nucifera]
		i2_HQ_K_c34429/f2p4/2271	Signal recognition particle receptor alpha subunit family protein [Theobroma cacao]
		i1_LQ_K_c4982/f5p2/1394	PREDICTED: zinc finger CCCH domain-containing protein 20-like [Nicotiana tabacum]
		i1_HQ_K_c37936/f2p0/1827	PREDICTED: BTB/POZ domain-containing protein At5g41330-like isoform X1 [Daucus carota subsp. sativus]
		i2_HQ_K_c74814/f17p3/2563	PREDICTED: U-box domain-containing protein 16 [Nicotiana attenuata]
		i1_LQ_K_c96001/f1p0/1007	PREDICTED: E3 ubiquitin-protein ligase RNF185 isoform X1 [Vitis vinifera]
		i1_LQ_K_c16233/f1p1/1066	ethylene responsive element binding factor 1 [Paeonia lactiflora]
		i2_HQ_K_c86997/f2p0/2727	sucrose synthase [Actinidia deliciosa]
		i0_LQ_K_c7796/f1p3/837	PREDICTED: reticulon-like protein B8 [Nicotiana tomentosiformis]
		i2_HQ_K_c115012/f2p3/2071	pyruvate kinase [Diospyros kaki]
		i1_HQ_K_c1032/f11p0/1969	PREDICTED: AAA-ATPase At2g46620-like [Daucus carota subsp. sativus]
		i1_HQ_K_c39440/f2p0/1777	PREDICTED: protein SRC2 homolog [Vitis vinifera]
		i2_HQ_K_c148301/f31p0/2906	PREDICTED: pyrophosphate-energized vacuolar membrane proton pump [Glycine max]
		i0_LQ_K_c24428/f1p5/745	bet v 1 related allergen [Actinidia deliciosa]
		i1_HQ_K_c10846/f5p0/1323	NAC transcription factor [Diospyros kaki]
		i2_HQ_K_c121392/f12p1/2512	PREDICTED: oligopeptide transporter 3 [Nicotiana tabacum]
		i1_HQ_K_c87724/f4p2/1491	PREDICTED: secretory carrier-associated membrane protein 3 [Citrus sinensis]
		i0_HQ_K_c18155/f2p0/656	PREDICTED: glycine cleavage system H protein 2, mitochondrial [Vitis vinifera]
		i2_LQ_K_c70069/f1p2/2021	pyruvate kinase [Diospyros kaki]
		i3_LQ_K_c34733/f1p3/3389	#N/A
		i1_HQ_K_c1512/f4p0/1253	Glycosyltransferase 39 like protein, partial [Cynara cardunculus var. scolymus]
		i1_HQ_K_c49330/f20p2/1658	PREDICTED: probable receptor-like protein kinase At5g24010 [Vitis vinifera]
		i2_LQ_K_c135177/f1p6/2455	Shaggy-related protein kinase zeta [Morus notabilis]
		i1_LQ_K_c89671/f4p10/1604	PREDICTED: plant cysteine oxidase 2 [Cucumis melo]
		i2_HQ_K_c148271/f20p3/2140	PREDICTED: T-complex protein 1 subunit beta [Vitis vinifera]
		i1_LQ_K_c23488/f1p7/1786	PREDICTED: fructose-bisphosphate aldolase cytoplasmic isozyme [Sesamum indicum]
		i3_HQ_K_c3740/f2p5/3478	PREDICTED: pyruvate decarboxylase 1 [Sesamum indicum]
		i1_HQ_K_c8420/f2p11/1145	PREDICTED: probable protein phosphatase 2C 58 [Daucus carota subsp. sativus]
		i1_LQ_K_c25948/f1p5/1675	PREDICTED: lysM domain-containing GPI-anchored protein 2 [Sesamum indicum]
		i1_HQ_K_c92390/f2p1/1180	PREDICTED: probable protein phosphatase 2C 58 [Daucus carota subsp. sativus]
		i1_HQ_K_c52154/f2p0/1645	PREDICTED: IAA-amino acid hydrolase ILR1-like 4 [Vitis vinifera]
		i1_HQ_K_c87973/f27p2/1167	PREDICTED: probable aquaporin PIP1-2 [Sesamum indicum]
		i0_LQ_K_c14321/f1p5/954	thaumatin-like protein [Actinidia deliciosa]
		i1_LQ_K_c96584/f1p0/1008	PREDICTED: 14-3-3-like protein GF14 kappa [Daucus carota subsp. sativus]
		i1_LQ_K_c15696/f1p0/1081	PREDICTED: REF/SRPP-like protein At3g05500 [Juglans regia]
		i1_HQ_K_c88873/f32p0/1141	PREDICTED: REF/SRPP-like protein At3g05500 [Juglans regia]
		i0_LQ_K_c18549/f1p0/852	glycine-rich protein [Oryza sativa Japonica Group]
		i1_LQ_K_c96268/f1p0/1002	PREDICTED: endo-1,3;1,4-beta-D-glucanase-like [Nicotiana tabacum]
		i0_HQ_K_c16788/f9p0/965	PREDICTED: lachrymatory-factor synthase-like [Sesamum indicum]
		i0_LQ_K_c21266/f1p1/797	bet v 1 related allergen [Actinidia deliciosa]
		i0_LQ_K_c23742/f1p0/926	bet v 1 related allergen [Actinidia deliciosa]
		i0_LQ_K_c28775/f1p0/941	thaumatin-like protein [Actinidia deliciosa]
		i0_HQ_K_c34314/f111p0/754	bet v 1 related allergen [Actinidia deliciosa]
		i0_LQ_K_c39392/f1p4/720	bet v 1 related allergen [Actinidia deliciosa]
		i0_HQ_K_c33706/f16p0/828	bet v 1 related allergen [Actinidia deliciosa]
		i0_LQ_K_c34105/f2p0/965	thaumatin-like protein [Actinidia chinensis]
		i0_LQ_K_c6580/f1p4/477	bet v 1 related allergen [Actinidia deliciosa]
		i1_LQ_K_c31714/f1p0/1103	PREDICTED: peroxidase 51-like [Gossypium raimondii]
		i1_LQ_K_c68802/f1p0/1312	PREDICTED: peroxidase 73-like [Gossypium raimondii]
		i2_HQ_K_c170928/f57p1/2158	PREDICTED: ferredoxin--nitrite reductase, chloroplastic [Sesamum indicum]
		i1_HQ_K_c80957/f5p0/1040	Expansin-related protein 1 precursor [Populus trichocarpa]
		i0_HQ_K_c460/f7p0/797	PREDICTED: pro-hevein [Ricinus communis]
		i1_HQ_K_c88641/f4p3/1305	PREDICTED: glucan endo-1,3-beta-glucosidase, basic vacuolar isoform-like [Juglans regia]
		i2_LQ_K_c102896/f1p13/1857	#N/A
		i1_HQ_K_c87855/f15p0/1080	PREDICTED: reticulon-like protein B5 [Nicotiana sylvestris]
		i1_LQ_K_c78940/f1p15/1947	bet v 1 related allergen [Actinidia deliciosa]
		i0_LQ_K_c34637/f3p1/750	bet v 1 related allergen [Actinidia deliciosa]
		i1_LQ_K_c70624/f1p1/1565	3-hydroxy-3-methylglutaryl-CoA synthase [Camellia sinensis]
		i0_LQ_K_c8851/f1p0/466	bet v 1 related allergen [Actinidia deliciosa]
		i0_HQ_K_c1260/f6p0/918	PREDICTED: abscisic acid receptor PYL4-like [Solanum tuberosum]
		i0_LQ_K_c21544/f1p0/974	thaumatin-like protein [Actinidia deliciosa]
		i4_LQ_K_c26088/f1p0/4736	#N/A
		i1_HQ_K_c88043/f16p0/1749	PREDICTED: shaggy-related protein kinase alpha [Vitis vinifera]
		i0_HQ_K_c2335/f2p0/723	PREDICTED: thiamine thiazole synthase, chloroplastic [Juglans regia]
		i1_HQ_K_c80950/f4p0/1093	PREDICTED: vacuolar protein sorting-associated protein 32 homolog 2-like [Pyrus x bretschneideri]
		i0_HQ_K_c1258/f4p0/940	PREDICTED: abscisic acid receptor PYL4 [Solanum lycopersicum]
		i0_LQ_K_c5883/f2p0/942	PREDICTED: cytochrome b5 isoform E-like [Sesamum indicum]
		i0_HQ_K_c7700/f3p0/817	PREDICTED: lachrymatory-factor synthase [Vitis vinifera]
		i0_HQ_K_c33957/f3p0/829	Translation initiation factor SUI1 [Corchorus olitorius]
		i1_HQ_K_c87787/f24p1/1697	eukaryotic initiation factor 4A-14-like [Dorcoceras hygrometricum]
		i1_LQ_K_c73340/f1p3/1854	PREDICTED: cytochrome b561 and DOMON domain-containing protein At5g47530-like [Capsicum annuum]
		i0_LQ_K_c21995/f1p0/951	putative glycine-rich RNA binding protein-like [Solanum tuberosum]
		i1_LQ_K_c5695/f1p11/1277	putative glycine-rich RNA binding protein-like [Solanum tuberosum]
		i2_HQ_K_c170235/f20p1/2786	raffinose synthase 1 [Camellia sinensis]
		i1_HQ_K_c88935/f11p7/1939	pyruvate kinase [Diospyros kaki]
		i0_LQ_K_c10514/f1p1/975	glutathione peroxidase 2 [Panax ginseng]
		i1_LQ_K_c31160/f1p0/1061	PREDICTED: guanine deaminase [Ziziphus jujuba]
		i1_LQ_K_c58511/f1p26/1529	bet v 1 related allergen [Actinidia deliciosa]
		i1_HQ_K_c80514/f6p3/1080	PREDICTED: abscisic acid receptor PYL4-like [Nicotiana tabacum]
		i0_HQ_K_c33695/f15p0/871	PREDICTED: heavy metal-associated isoprenylated plant protein 26 [Gossypium raimondii]
		i1_LQ_K_c20074/f1p16/1154	bet v 1 related allergen [Actinidia deliciosa]
		i2_LQ_K_c127889/f1p7/2441	#N/A
		i1_HQ_K_c86821/f10p3/1516	PREDICTED: probable protein phosphatase 2C 10 [Daucus carota subsp. sativus]
		i0_LQ_K_c26270/f1p0/672	PREDICTED: ubiquitin-conjugating enzyme E2-17 kDa [Cucumis melo]
		i1_HQ_K_c6428/f3p2/1626	PREDICTED: ectonucleotide pyrophosphatase/phosphodiesterase family member 3 [Juglans regia]
		i2_HQ_K_c171143/f99p8/2563	PREDICTED: protein STRUBBELIG-RECEPTOR FAMILY 6 [Vitis vinifera]
		i1_HQ_K_c88172/f36p0/1855	PREDICTED: cytochrome P450 714C2-like [Juglans regia]
		i1_LQ_K_c56501/f1p17/1364	bet v 1 related allergen [Actinidia deliciosa]
		i1_HQ_K_c18032/f8p2/1627	PREDICTED: ectonucleotide pyrophosphatase/phosphodiesterase family member 3 [Juglans regia]
		i1_LQ_K_c36412/f1p1/1462	actinidin Act2d [Actinidia eriantha]
		i1_HQ_K_c32937/f3p0/1438	glyceraldehyde-3-phosphate dehydrogenase C [Shorea beccariana]
		i1_LQ_K_c82359/f1p8/1050	PREDICTED: 1-aminocyclopropane-1-carboxylate oxidase 1-like isoform X1 [Juglans regia]
		i1_HQ_K_c1584/f5p1/1276	PREDICTED: stem-specific protein TSJT1 [Cicer arietinum]
		i1_LQ_K_c83216/f1p2/1081	PREDICTED: early nodulin-93 [Theobroma cacao]
		i0_LQ_K_c24906/f1p0/741	PREDICTED: stem-specific protein TSJT1 [Nicotiana attenuata]
		i1_HQ_K_c68418/f6p4/1046	ascorbate peroxidase [Camellia japonica]
		i1_LQ_K_c55005/f1p118/1782	PREDICTED: stem-specific protein TSJT1-like [Juglans regia]
		i0_LQ_K_c6818/f2p1/710	bet v 1 related allergen [Actinidia deliciosa]
		i1_LQ_K_c78990/f1p2/1935	PREDICTED: stem-specific protein TSJT1-like [Juglans regia]
		i1_LQ_K_c48226/f1p0/1020	PREDICTED: ABC transporter I family member 17 [Daucus carota subsp. sativus]
		i0_HQ_K_c1914/f3p0/643	PREDICTED: protein translation factor SUI1 homolog 2 [Glycine max]
		i1_LQ_K_c66390/f1p1/1081	PREDICTED: 1-aminocyclopropane-1-carboxylate oxidase 1 [Vitis vinifera]
		i1_HQ_K_c1620/f3p0/1422	PREDICTED: ABC transporter I family member 17 [Daucus carota subsp. sativus]
		i1_HQ_K_c86715/f20p2/1553	PREDICTED: formate dehydrogenase, mitochondrial [Vitis vinifera]
		i1_LQ_K_c96070/f1p0/1001	glutathione S-transferase U45 [Populus euphratica]
		i3_LQ_K_c26386/f1p14/3631	#N/A
		i1_HQ_K_c10113/f5p1/1946	PREDICTED: zeatin O-glucosyltransferase-like [Vitis vinifera]
		i1_LQ_K_c57345/f1p0/1406	ADH2 [Actinidia deliciosa]
		i0_LQ_K_c1736/f1p0/978	PREDICTED: proactivator polypeptide-like 1 [Theobroma cacao]
		i2_HQ_K_c146831/f7p5/2147	alanine aminotransferase 1 [Camellia sinensis]
		i2_HQ_K_c72218/f3p0/2248	glyceraldehyde-3-phosphate dehydrogenase C [Shorea beccariana]
		i1_LQ_K_c59053/f1p0/1257	PREDICTED: glyceraldehyde-3-phosphate dehydrogenase, cytosolic [Gossypium hirsutum]
		i2_HQ_K_c172144/f4p0/2044	PREDICTED: alanine aminotransferase 2 [Ricinus communis]
		i1_HQ_K_c22156/f3p14/1355	PREDICTED: persulfide dioxygenase ETHE1 homolog, mitochondrial isoform X1 [Gossypium arboreum]
		i2_HQ_K_c75385/f20p3/2091	PREDICTED: protein RCC2 isoform X1 [Nicotiana attenuata]
		i0_HQ_K_c13941/f2p0/726	PREDICTED: small nuclear ribonucleoprotein Sm D2 isoform X1 [Nelumbo nucifera]
		i0_HQ_K_c9253/f3p3/994	dehydrin [Rhododendron catawbiense]
		i1_HQ_K_c88553/f3p1/1659	PREDICTED: developmentally-regulated G-protein 3 isoform X2 [Vitis vinifera]
		i2_LQ_K_c149350/f1p0/2114	#N/A
		i2_HQ_K_c162960/f2p4/2019	PREDICTED: 6-phosphogluconate dehydrogenase, decarboxylating 3 [Citrus sinensis]
		i0_HQ_K_c18338/f2p10/603	Early nodulin-93 [Theobroma cacao]
		i0_HQ_K_c1371/f11p0/462	Early nodulin-93 [Theobroma cacao]
		i0_HQ_K_c33418/f2p0/749	PREDICTED: snakin-2 isoform X2 [Ricinus communis]
		i1_HQ_K_c12468/f6p5/1294	PREDICTED: glyceraldehyde-3-phosphate dehydrogenase, cytosolic [Gossypium arboreum]
		i0_HQ_K_c865/f5p0/470	PREDICTED: thioredoxin-like protein CXXS1 [Jatropha curcas]
		i2_LQ_K_c43684/f1p3/2862	sucrose synthase [Actinidia deliciosa]
		i1_HQ_K_c7664/f4p1/1878	PREDICTED: fructose-bisphosphate aldolase 1, cytoplasmic [Nelumbo nucifera]
		i1_LQ_K_c54338/f1p1/1173	PREDICTED: CCG-binding protein 1 [Nicotiana attenuata]
		i2_HQ_K_c19349/f2p0/2658	sucrose synthase [Actinidia deliciosa]
		i0_LQ_K_c25644/f1p0/806	PREDICTED: pleckstrin homology domain-containing protein 1-like [Populus euphratica]
		i1_LQ_K_c37513/f1p6/1065	PREDICTED: tropinone reductase homolog At5g06060-like isoform X1 [Nelumbo nucifera]
		i2_LQ_K_c43468/f1p5/2200	PREDICTED: glucose-6-phosphate isomerase 1, chloroplastic [Vitis vinifera]
		i1_LQ_K_c15718/f1p0/1057	14-3-3 protein [Vitis vinifera]
		i1_LQ_K_c52487/f1p0/1430	jasmonate ZIM-domain protein 2 [Vitis quinquangularis]
		i1_HQ_K_c83856/f5p4/1128	PREDICTED: eukaryotic translation initiation factor 6-2 [Lupinus angustifolius]
		i1_HQ_K_c11969/f3p1/1218	PREDICTED: bZIP transcription factor 53-like [Daucus carota subsp. sativus]
		i1_HQ_K_c1315/f5p0/1389	PREDICTED: hevein-like preproprotein [Citrus sinensis]
		i0_HQ_K_c1077/f5p0/791	PREDICTED: 28 kDa heat- and acid-stable phosphoprotein isoform X2 [Daucus carota subsp. sativus]
		i1_HQ_K_c87749/f6p0/1284	PREDICTED: auxin-induced protein 22D [Vitis vinifera]
		i0_HQ_K_c608/f5p0/989	Succinate dehydrogenase 5 [Theobroma cacao]
		i1_HQ_K_c32125/f18p0/1927	PREDICTED: lysine histidine transporter-like 8 [Theobroma cacao]
		i1_HQ_K_c87671/f7p0/1770	cysteine protease Cp6 [Actinidia deliciosa]
		i1_HQ_K_c87713/f80p1/1447	PREDICTED: zinc finger CCCH domain-containing protein 20 [Citrus sinensis]
		i1_HQ_K_c3387/f5p3/1361	PREDICTED: NDR1/HIN1-like protein 12 [Pyrus x bretschneideri]
		i0_LQ_K_c12871/f1p0/897	PREDICTED: universal stress protein A-like protein [Sesamum indicum]
		i1_HQ_K_c24803/f4p0/1431	sucrose responsive element binding protein [Vitis vinifera]
		i1_HQ_K_c22555/f2p0/1756	PREDICTED: universal stress protein A-like protein [Sesamum indicum]
		i0_HQ_K_c23058/f2p3/814	PREDICTED: ubiquitin-conjugating enzyme E2 28-like [Nelumbo nucifera]
		i0_HQ_K_c2513/f2p24/798	PREDICTED: universal stress protein A-like protein [Sesamum indicum]
		i0_LQ_K_c8784/f1p12/937	glutathione S-transferase 1 [Diospyros kaki]
		i1_HQ_K_c33903/f8p0/1656	PREDICTED: basic 7S globulin [Eucalyptus grandis]
		i1_LQ_K_c84854/f1p1/1096	PREDICTED: glutathione S-transferase U17-like [Nicotiana attenuata]
		i1_LQ_K_c96637/f1p0/1015	Pectinesterase inhibitor [Corchorus olitorius]
		i1_LQ_K_c84636/f1p2/1082	PREDICTED: 60S ribosomal protein L7-2-like [Ipomoea nil]
		i2_HQ_K_c139236/f4p0/2278	PREDICTED: probable methylenetetrahydrofolate reductase [Sesamum indicum]
		i1_HQ_K_c87730/f3p0/1290	nam-like protein [Camellia sinensis]
		i2_LQ_K_c118692/f1p9/2067	#N/A
		i0_HQ_K_c2072/f7p7/973	Ribosomal_L6e domain-containing protein/Ribosomal_L6e_N domain-containing protein [Cephalotus follicularis]
		i1_HQ_K_c66916/f13p0/1838	PREDICTED: flavin-dependent oxidoreductase FOX2-like [Ziziphus jujuba]
		i1_HQ_K_c49102/f9p0/1210	aquaporin PIP2;2 [Quercus petraea]
		i1_LQ_K_c77537/f1p0/1135	ripening-related protein-like [Vitis vinifera]
		i0_LQ_K_c10080/f1p44/478	Plant peroxidase [Corchorus capsularis]
		i2_HQ_K_c122100/f4p3/2083	chitodextrinase [Eucommia ulmoides]
		i2_LQ_K_c56231/f1p5/2218	PREDICTED: pyrophosphate--fructose 6-phosphate 1-phosphotransferase subunit beta-like [Nicotiana tabacum]
		i0_LQ_K_c34632/f1p0/851	PREDICTED: actin-depolymerizing factor 2-like isoform X2 [Gossypium hirsutum]
		i1_LQ_K_c30728/f1p5/1078	ADH2 [Actinidia deliciosa]
		i1_LQ_K_c14510/f1p0/1156	Alcohol dehydrogenase 1 [Ananas comosus]
		i1_LQ_K_c50459/f1p1/1641	peroxidase [Populus sieboldii x Populus grandidentata]
		i1_HQ_K_c683/f15p1/1237	fructokinase [Actinidia chinensis]
		i0_HQ_K_c18669/f2p0/812	late embryogenesis abundant protein 3L-1 [Camellia sinensis]
		i0_LQ_K_c13538/f1p0/713	bet v 1 related allergen [Actinidia deliciosa]
		i1_LQ_K_c95961/f1p0/1014	PREDICTED: polyubiquitin 11 isoform X2 [Brachypodium distachyon]
		i2_LQ_K_c150587/f1p183/2170	#N/A
		i0_HQ_K_c1843/f4p9/613	PREDICTED: small ubiquitin-related modifier 1-like [Juglans regia]
		i1_LQ_K_c55933/f1p0/1305	ethylene response factor 7 [Actinidia deliciosa]
		i2_HQ_K_c172010/f30p6/2465	PDC1 [Actinidia deliciosa]
		i1_HQ_K_c88178/f61p5/1583	PREDICTED: phosphoglycerate kinase, cytosolic [Gossypium arboreum]
		i0_HQ_K_c2567/f6p3/957	PREDICTED: GTP-binding nuclear protein Ran-3-like [Juglans regia]
		i1_LQ_K_c13009/f1p0/1283	ADH2 [Actinidia deliciosa]
		i1_HQ_K_c1909/f9p1/1620	Mitochondrial carrier protein [Corchorus olitorius]
		i0_HQ_K_c10485/f2p0/722	histone H1-like protein [Camellia sinensis]
[truncated: 148 more rows]

## Sheet: Table S8
Table S8 Top 60 hub gene in the blue module obtained by WGCNA.
ID	Rank	Score	NR
i1_LQ_K_c9585/f1p0/1672	1	196	PREDICTED: glutamate--tRNA ligase, cytoplasmic-like [Gossypium arboreum]
i1_LQ_K_c38965/f1p0/1342	2	177	ADH2 [Actinidia deliciosa]
i1_LQ_K_c39892/f1p1/1624	3	176	PREDICTED: peroxidase 73-like [Gossypium raimondii]
i1_LQ_K_c79396/f1p1/1504	4	175	glyceraldehyde-3-phosphate dehydrogenase C [Shorea beccariana]
i2_HQ_K_c9043/f2p1/2399	5	171	PREDICTED: cysteine-rich receptor-like protein kinase 2 isoform X1 [Vitis vinifera]
i1_HQ_K_c49284/f53p1/1329	6	170	PREDICTED: cysteine synthase [Vitis vinifera]
i1_HQ_K_c4804/f3p19/1387	7	167	ADH2 [Actinidia deliciosa]
i1_HQ_K_c11053/f7p1/1889	8	164	PREDICTED: fructose-bisphosphate aldolase cytoplasmic isozyme [Sesamum indicum]
i1_LQ_K_c77636/f1p3/1785	9	164	glyceraldehyde-3-phosphate dehydrogenase C [Shorea beccariana]
i2_HQ_K_c122139/f38p9/2100	10	163	PREDICTED: pyruvate kinase, cytosolic isozyme [Jatropha curcas]
i1_LQ_K_c71850/f1p0/1621	11	162	PREDICTED: fructose-bisphosphate aldolase cytoplasmic isozyme [Sesamum indicum]
i2_HQ_K_c170823/f23p8/2171	12	162	PREDICTED: pyruvate kinase, cytosolic isozyme [Jatropha curcas]
i3_LQ_K_c25882/f1p0/3335	13	162	PREDICTED: fructose-bisphosphate aldolase cytoplasmic isozyme [Sesamum indicum]
i1_LQ_K_c84128/f1p6/1082	14	161	6-phosphogluconolactonase, DevB-type [Corchorus capsularis]
i2_LQ_K_c129561/f1p4/2133	15	161	signal recognition particle receptor protein, putative [Medicago truncatula]
i1_HQ_K_c88154/f3p8/1761	16	160	PREDICTED: shaggy-related protein kinase alpha isoform X1 [Vitis vinifera]
i1_LQ_K_c89671/f4p10/1604	17	160	PREDICTED: plant cysteine oxidase 2 [Cucumis melo]
i1_LQ_K_c88258/f1p0/1915	18	159	PREDICTED: pyruvate kinase, cytosolic isozyme [Jatropha curcas]
i1_HQ_K_c87531/f6p0/1200	19	159	ethylene response factor 4 [Actinidia deliciosa]
i1_LQ_K_c68121/f11p1/1342	20	159	PREDICTED: peroxidase 73 [Eucalyptus grandis]
i0_HQ_K_c34260/f53p0/902	21	158	PREDICTED: protein EARLY RESPONSIVE TO DEHYDRATION 15-like [Daucus carota subsp. sativus]
i1_LQ_K_c70323/f1p1/1890	22	156	PREDICTED: pectinesterase [Juglans regia]
i2_LQ_K_c26809/f1p0/2865	23	156	sucrose synthase [Actinidia chinensis]
i3_HQ_K_c44244/f38p0/3574	24	156	PREDICTED: LOW QUALITY PROTEIN: receptor-like protein kinase HSL1 [Sesamum indicum]
i1_LQ_K_c74053/f1p0/1659	25	155	PREDICTED: fructose-bisphosphate aldolase cytoplasmic isozyme [Sesamum indicum]
i1_HQ_K_c971/f5p0/1572	26	154	stearoy-l ACP desaturase [Camellia oleifera]
i1_LQ_K_c2779/f1p5/1995	27	153	D-galacturonic acid reductase 1 [Actinidia deliciosa]
i1_LQ_K_c54987/f1p0/1279	28	151	glyceraldehyde-3-phosphate dehydrogenase C [Shorea beccariana]
i1_LQ_K_c67155/f1p0/1459	29	150	ADH1 [Actinidia deliciosa]
i3_HQ_K_c34105/f3p0/3172	30	150	PREDICTED: S-adenosylmethionine synthase 2 [Ziziphus jujuba]
i3_LQ_K_c16712/f1p0/3064	31	150	PREDICTED: universal stress protein A-like protein [Ziziphus jujuba]
i1_LQ_K_c70474/f1p1/1653	32	150	Glutamate-1-semialdehyde 2,1-aminomutase 2, chloroplastic -like protein [Gossypium arboreum]
i2_HQ_K_c148393/f23p0/2257	33	149	PREDICTED: pyruvate decarboxylase 1 [Sesamum indicum]
i1_LQ_K_c6677/f1p5/1285	34	149	6-phosphogluconolactonase, DevB-type [Corchorus capsularis]
i1_LQ_K_c72438/f1p0/1555	35	149	PREDICTED: aspartate aminotransferase, cytoplasmic [Theobroma cacao]
i1_LQ_K_c23488/f1p7/1786	36	149	PREDICTED: fructose-bisphosphate aldolase cytoplasmic isozyme [Sesamum indicum]
i1_LQ_K_c53707/f1p1/1256	37	148	hypothetical protein glysoja_002898 [Glycine soja]
i1_LQ_K_c74797/f1p0/1477	38	148	PREDICTED: heterogeneous nuclear ribonucleoprotein A/B-like [Arachis duranensis]
i1_LQ_K_c95833/f1p3/1019	39	147	PREDICTED: universal stress protein A-like protein [Ziziphus jujuba]
i1_LQ_K_c21324/f1p3/1484	40	147	PREDICTED: cysteine synthase [Vitis vinifera]
i1_LQ_K_c44074/f1p1/1657	41	146	PREDICTED: S-adenosylmethionine synthase 1 [Ricinus communis]
i1_LQ_K_c15961/f1p1/1119	42	146	Haloacid dehalogenase-like hydrolase domain-containing protein 3 [Morus notabilis]
i1_LQ_K_c14183/f1p5/1390	43	146	stearoy-l ACP desaturase [Camellia oleifera]
i1_LQ_K_c68802/f1p0/1312	44	146	PREDICTED: peroxidase 73-like [Gossypium raimondii]
i1_LQ_K_c84263/f1p0/1039	45	145	PREDICTED: LOB domain-containing protein 41 [Sesamum indicum]
i1_HQ_K_c25046/f2p0/1700	46	145	PREDICTED: ferredoxin--nitrite reductase, chloroplastic [Sesamum indicum]
i1_HQ_K_c87512/f6p1/1214	47	145	Gly-zipper_Omp domain-containing protein/zf-RING_2 domain-containing protein [Cephalotus follicularis]
i2_HQ_K_c1654/f6p14/2849	48	145	PREDICTED: beta-amyrin 28-oxidase-like [Juglans regia]
i2_LQ_K_c47420/f1p21/2269	49	144	ADH1 [Actinidia deliciosa]
i2_LQ_K_c7322/f1p19/2855	50	144	PREDICTED: universal stress protein A-like protein [Ziziphus jujuba]
i1_LQ_K_c12806/f1p2/1245	51	143	ADH2 [Actinidia deliciosa]
i2_HQ_K_c171325/f20p0/2198	52	143	alanine aminotransferase 1 [Camellia sinensis]
i1_HQ_K_c87739/f2p2/1205	53	143	PREDICTED: vesicle-associated protein 4-2-like [Daucus carota subsp. sativus]
i1_HQ_K_c10258/f2p4/1191	54	142	PREDICTED: 1-aminocyclopropane-1-carboxylate oxidase 1 [Jatropha curcas]
i0_HQ_K_c1807/f5p0/922	55	142	PREDICTED: universal stress protein A-like protein [Ricinus communis]
i1_HQ_K_c1736/f4p1/1567	56	142	PREDICTED: transcription factor bHLH128-like [Juglans regia]
i2_LQ_K_c82159/f1p6/2230	57	142	PREDICTED: stress response protein NST1 [Vitis vinifera]
i1_HQ_K_c68382/f8p6/1056	58	141	isopentenyl diphosphate isomerase [Actinidia arguta]
i0_HQ_K_c33303/f12p0/683	59	141	Globin [Corchorus capsularis]
i2_LQ_K_c145880/f1p3/2079	60	141	PREDICTED: uncharacterized protein LOC109011949 [Juglans regia]
