# Supplementary material for: Full-Length Transcriptome and RNA-Seq Analyses Reveal the Mechanisms Underlying Waterlogging Tolerance in Kiwifruit (Actinidia valvata)
Source: Int J Mol Sci. 2022 Mar 17;23(6):3237. doi: 10.3390/ijms23063237 (PMC8951935; doi:10.3390/ijms23063237)
Supplement: Supplementary file 1 [file ijms-23-03237-s001.zip › Additional file 11.xlsx]

## Sheet: Table S9
Table S9 Primers used for qRT-PCR.
Gene	Forward (5’-3’)	Reverse (5’-3’)
i2_HQ_K_c148393/f23p0/2257 (PDC1)	AAGGTCAAAGGCACAAAAGGCGT	ACCAGTCCTTTACCTGACGGCAT
i2_LQ_K_c26809/f1p0/2865 (SUS1)	TATCATTCCTCGCATTCTCATCGT	TATGCGAATGTTCTGCTCCGTAAA
i2_HQ_K_c171325/f20p0/2198 (AlaAT1)	AAATGTGAGTATGCTGTCCGTGGT	TGCAGTAAAGTATCTCGTCAAAAGG
i1_HQ_K_c1736/f4p1/1567 (bHLH128-like)	ATCAAACCCCAAACAGCACCATA	AGATGACGCCAGATGATTGAGAA
i1_LQ_K_c84263/f1p0/1039 (LOB41)	TGTAGCGACAACTGTAGCATAAGGC	GTAGAACTTGGCGAGGAAGACGG
i1_LQ_K_c68121/f11p1/1342 (POD73)	GTGTTTATTCCCTCATTCGGCGT	GAAGCAATCGTGGAAGAAGAGAC
i1_HQ_K_c87531/f6p0/1200 (ERF77)	AATGGAGGCTTTCGTGACAATCT	CCCAAAAACTTCTTCGCTGTGA
i1_LQ_K_c67155/f1p0/1459 (ADH1)	TGCGGGTGCTTCAAGGATTAT	CAATCACCTCTTGAACGGGCT
i1_LQ_K_c38965/f1p0/1342 (ADH2)	TCCCCCACAAAGATGCTGTATTC	GGGATGTCTGAACGGGGCTTAT
i2_HQ_K_c146831/f7p5/2147 (AlaAT)	TCTTCTTCTGTGTTGCATCATCCTC	CCACGGACAGCATACTCACATTTC
i3_LQ_K_c32001/f1p1/3012 (NADH-GOGAT)	GCTGCTGCTGACCAGTTGAATA	CCTCCTGCTCCATAAGGTCAAC
i4_LQ_K_c24284/f1p0/4938 (NADH-GOGAT)	GGCAAGATTGTTGTCTATCCTCCT	GCACAACAACAGTCCCACCAGT
i1_LQ_K_c14090/f1p1/1743 (Mn-SOD)	TGCCCTAAGAGCATCTCCAACA	CATTTATTGGTTGACCAGCCTCC
i2_HQ_K_c5632/f4p6/2696 (Mn-SOD)	AAAATCGCTAAAAGGCGGGCTA	CTGGAGGGCGTTGTTGTAGTTG
i1_HQ_K_c28263/f2p2/1591 (POD)	CCTACGCTCAACAAAACATACGC	AGACATTGTCAAAGGTTCTCGGA
actin	TGCATGAGCGATCAAGTTTCAAG	TGTCCCATGTCTGGTTGATGACT
